# Supplementary material
Source: MDPI journal article supplement (https://www.mdpi.com/2076-0752/8/3/118)

## SUPPLEMENTARY 2

# Tests of the Facsimiles

1. Nested Squares instead of Circles
2. Vanishing Vertical Axis on Actual Walls
3. Vanishing Vertical Axis on Facsimiles

# 1. Nested Squares instead of Circles

House of Augustus

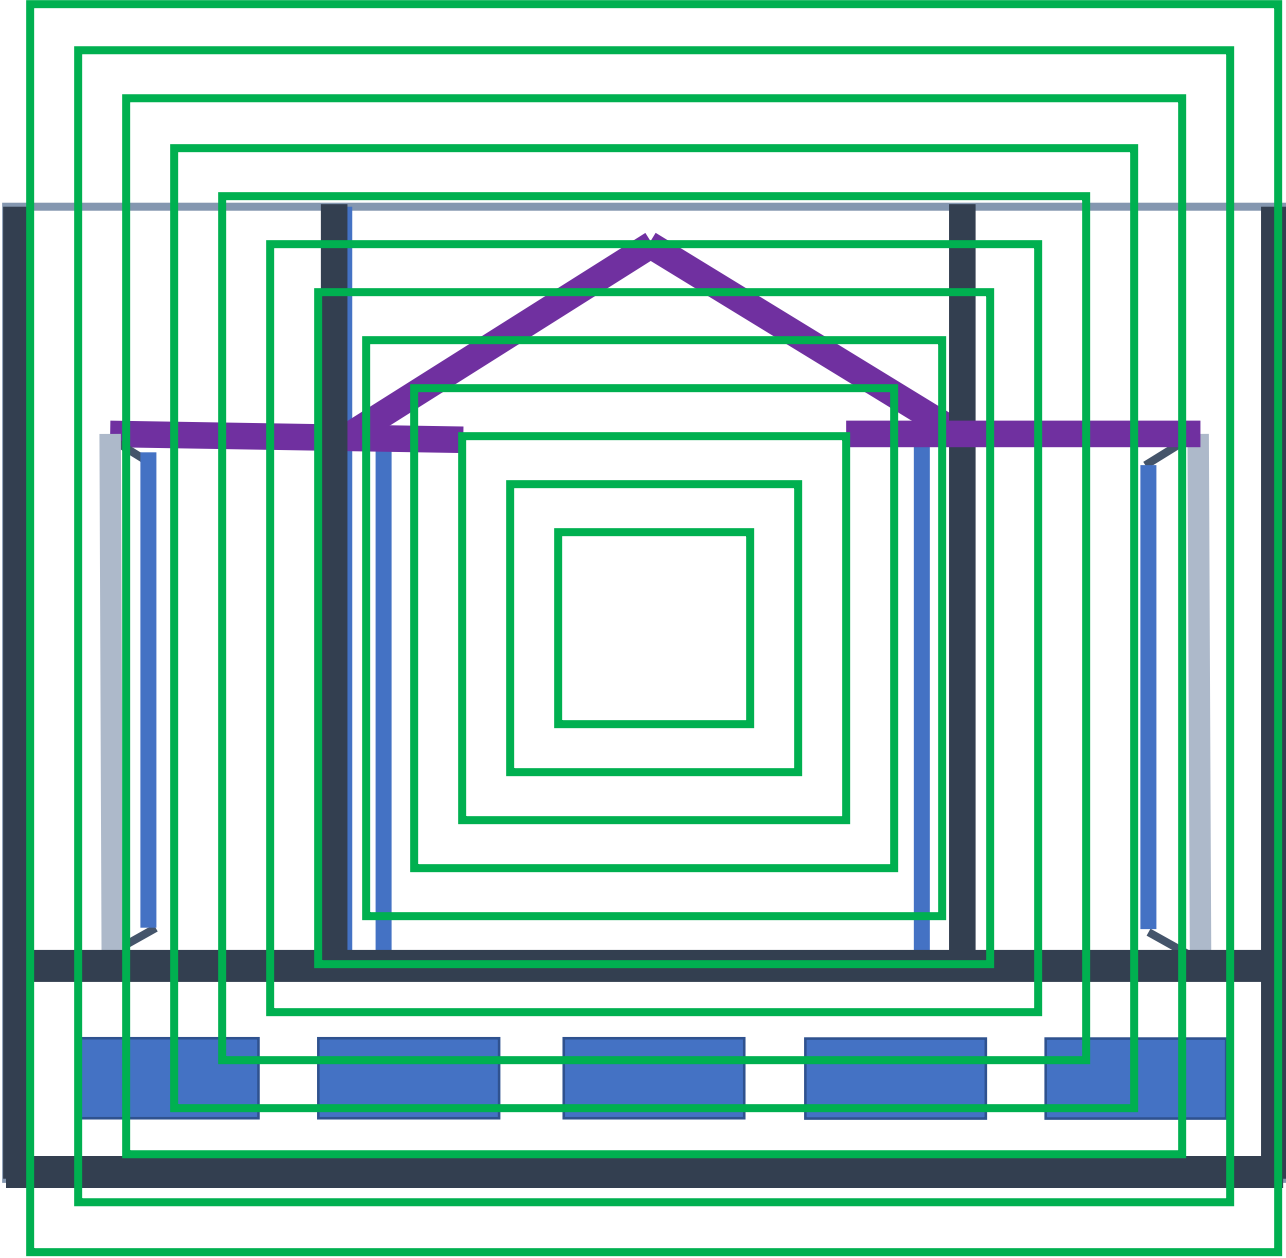

# Oplontis

## 1.2

Boscoreale

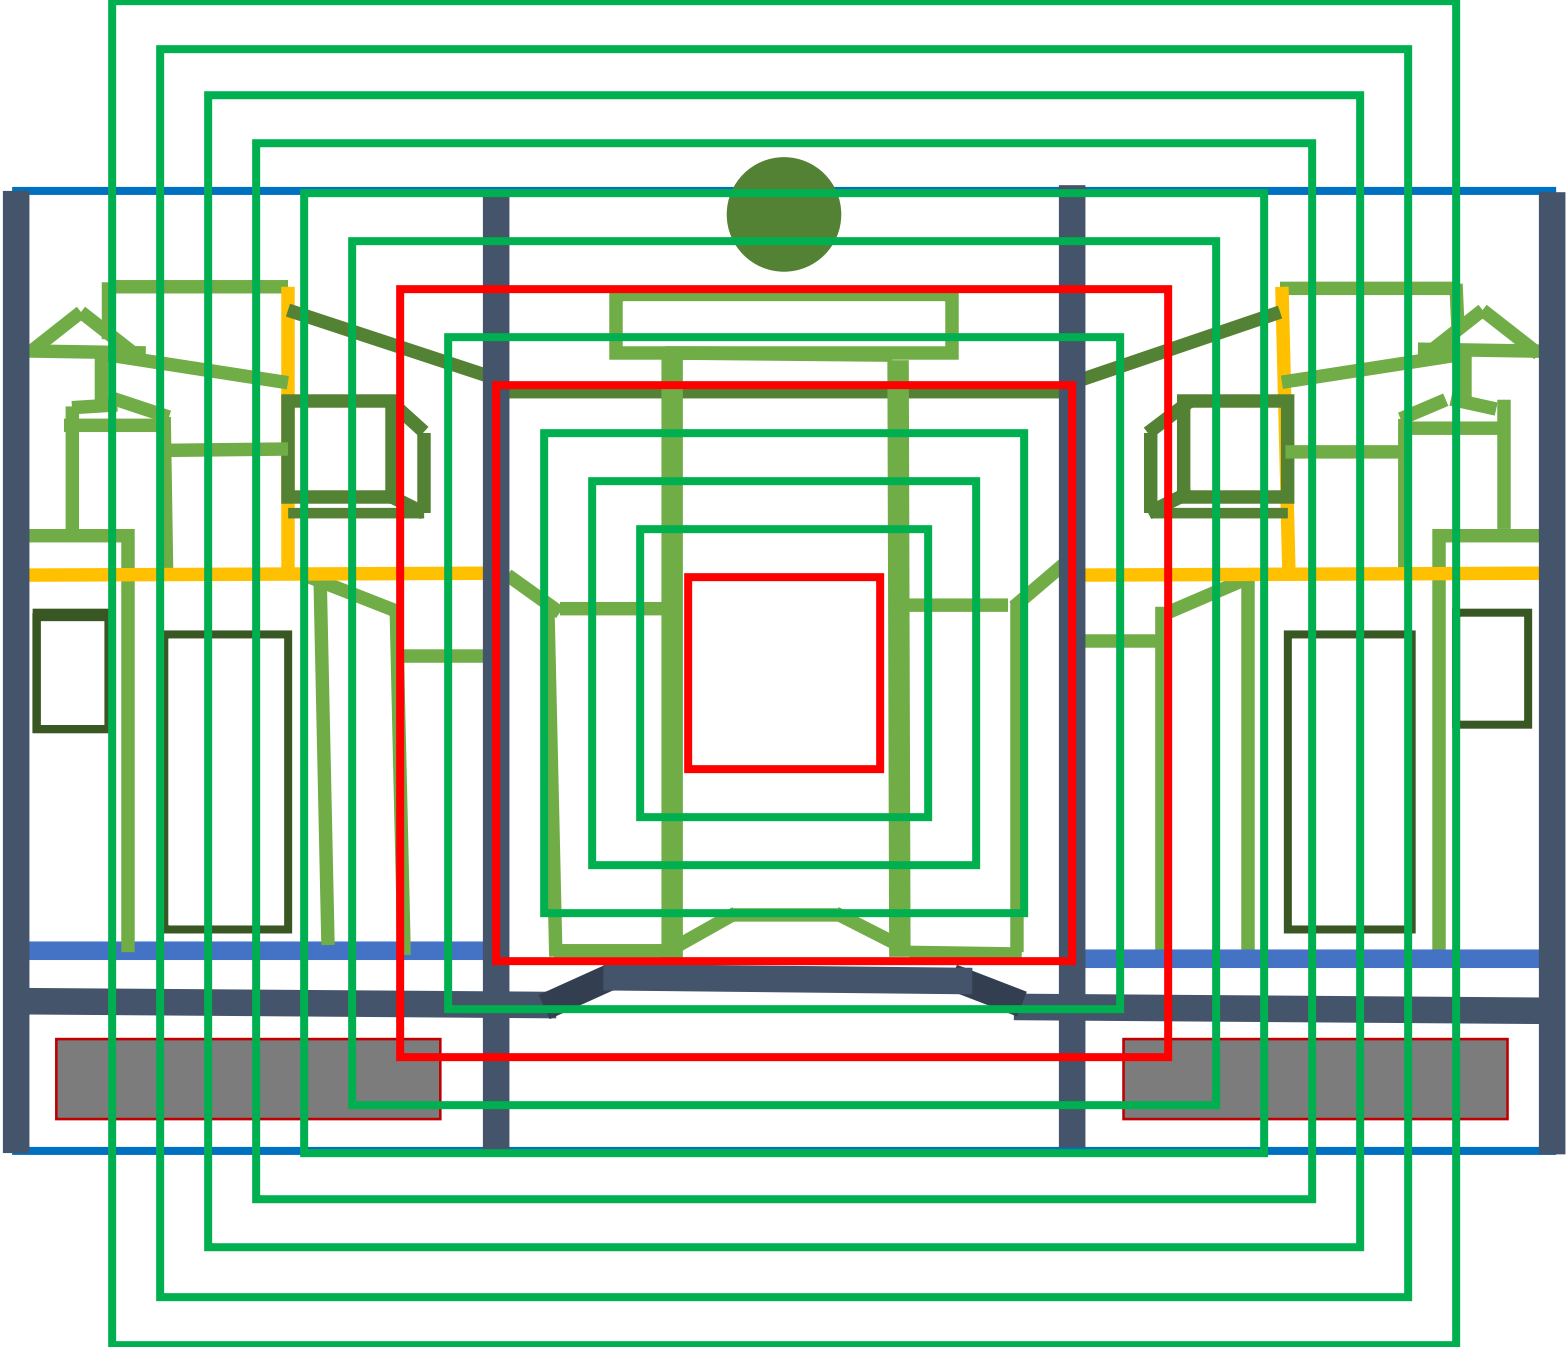

House of the  
Cryptoporticus

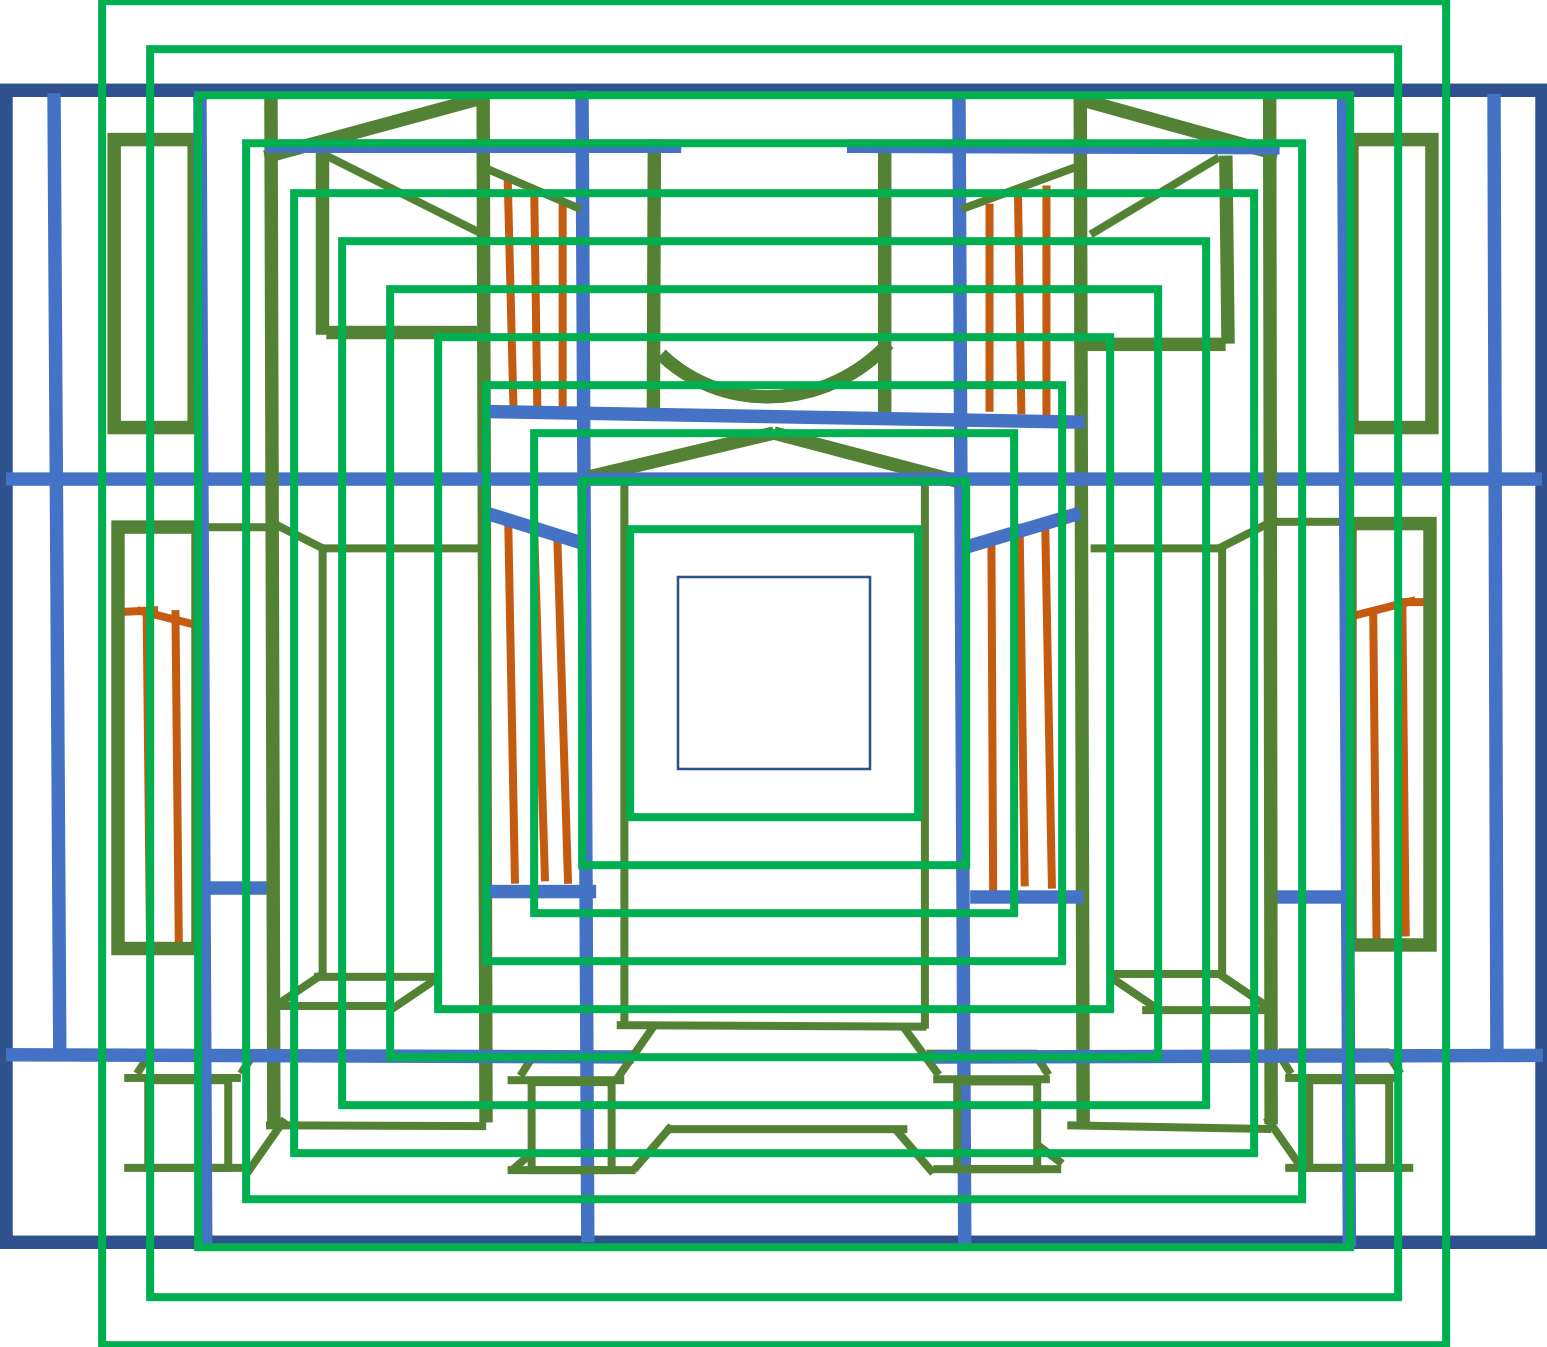

House of Marcus  
Lucretius Fronto

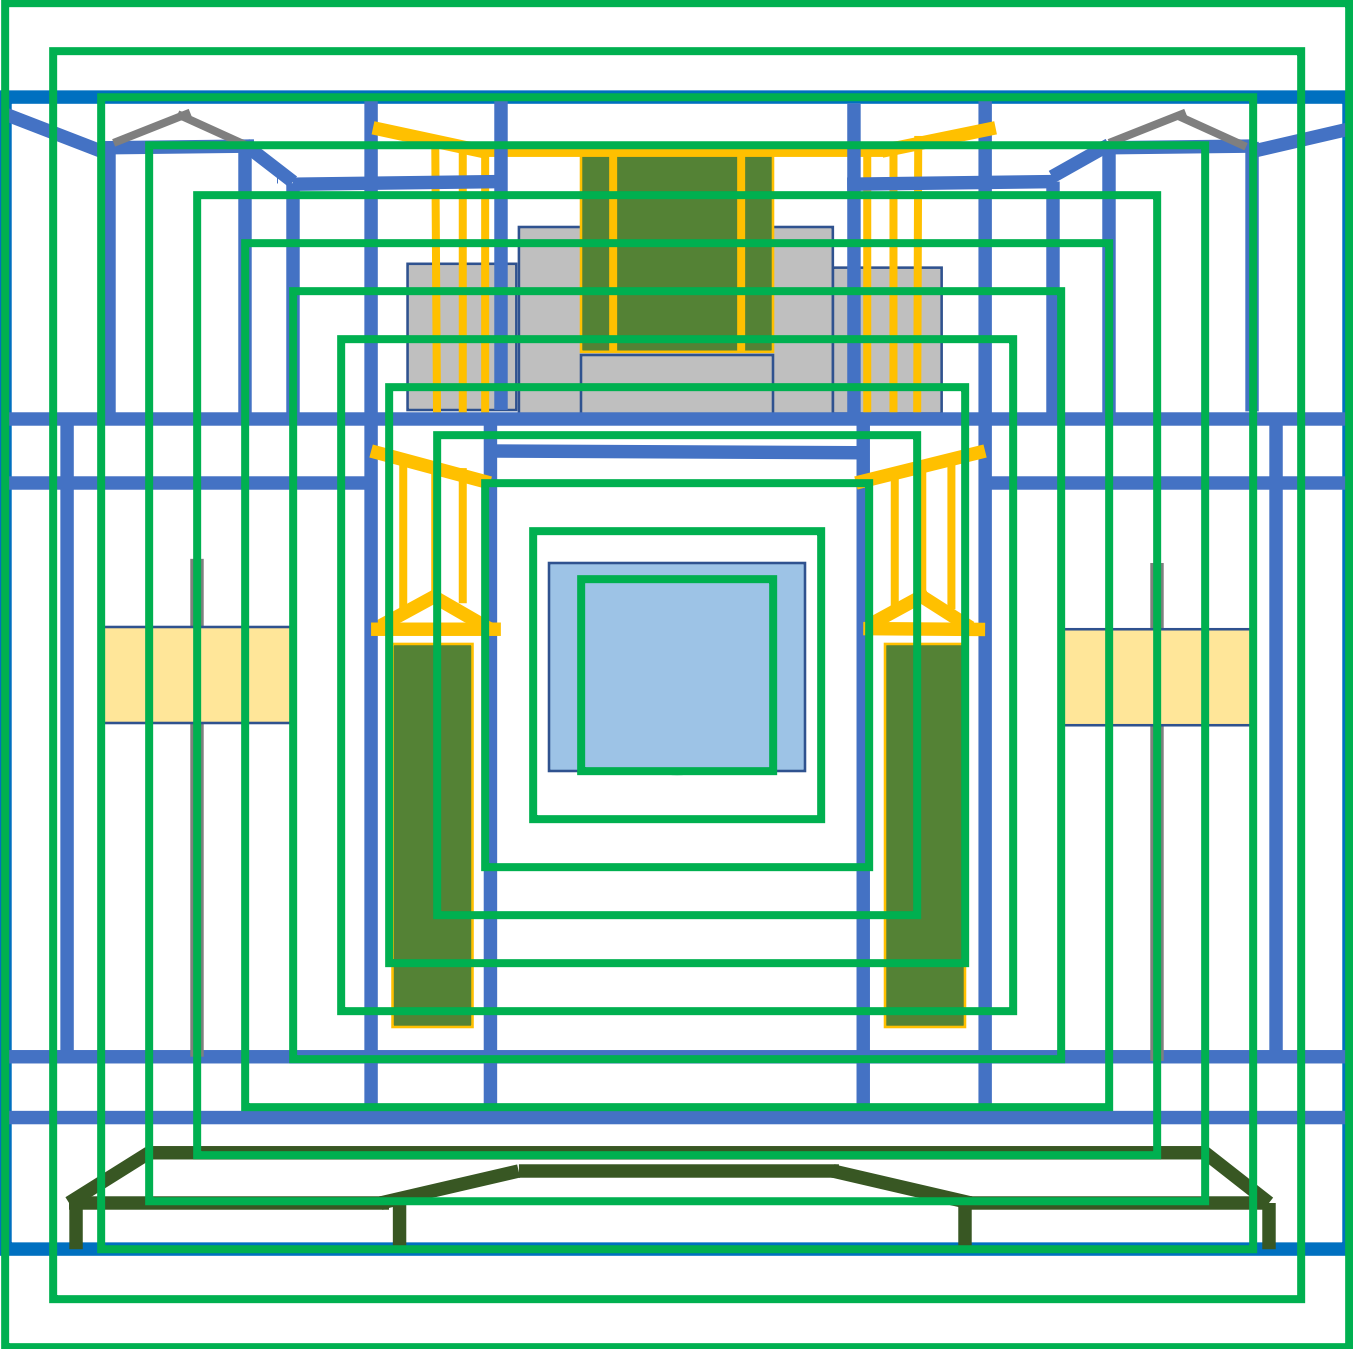

House of the Vettii

1.6

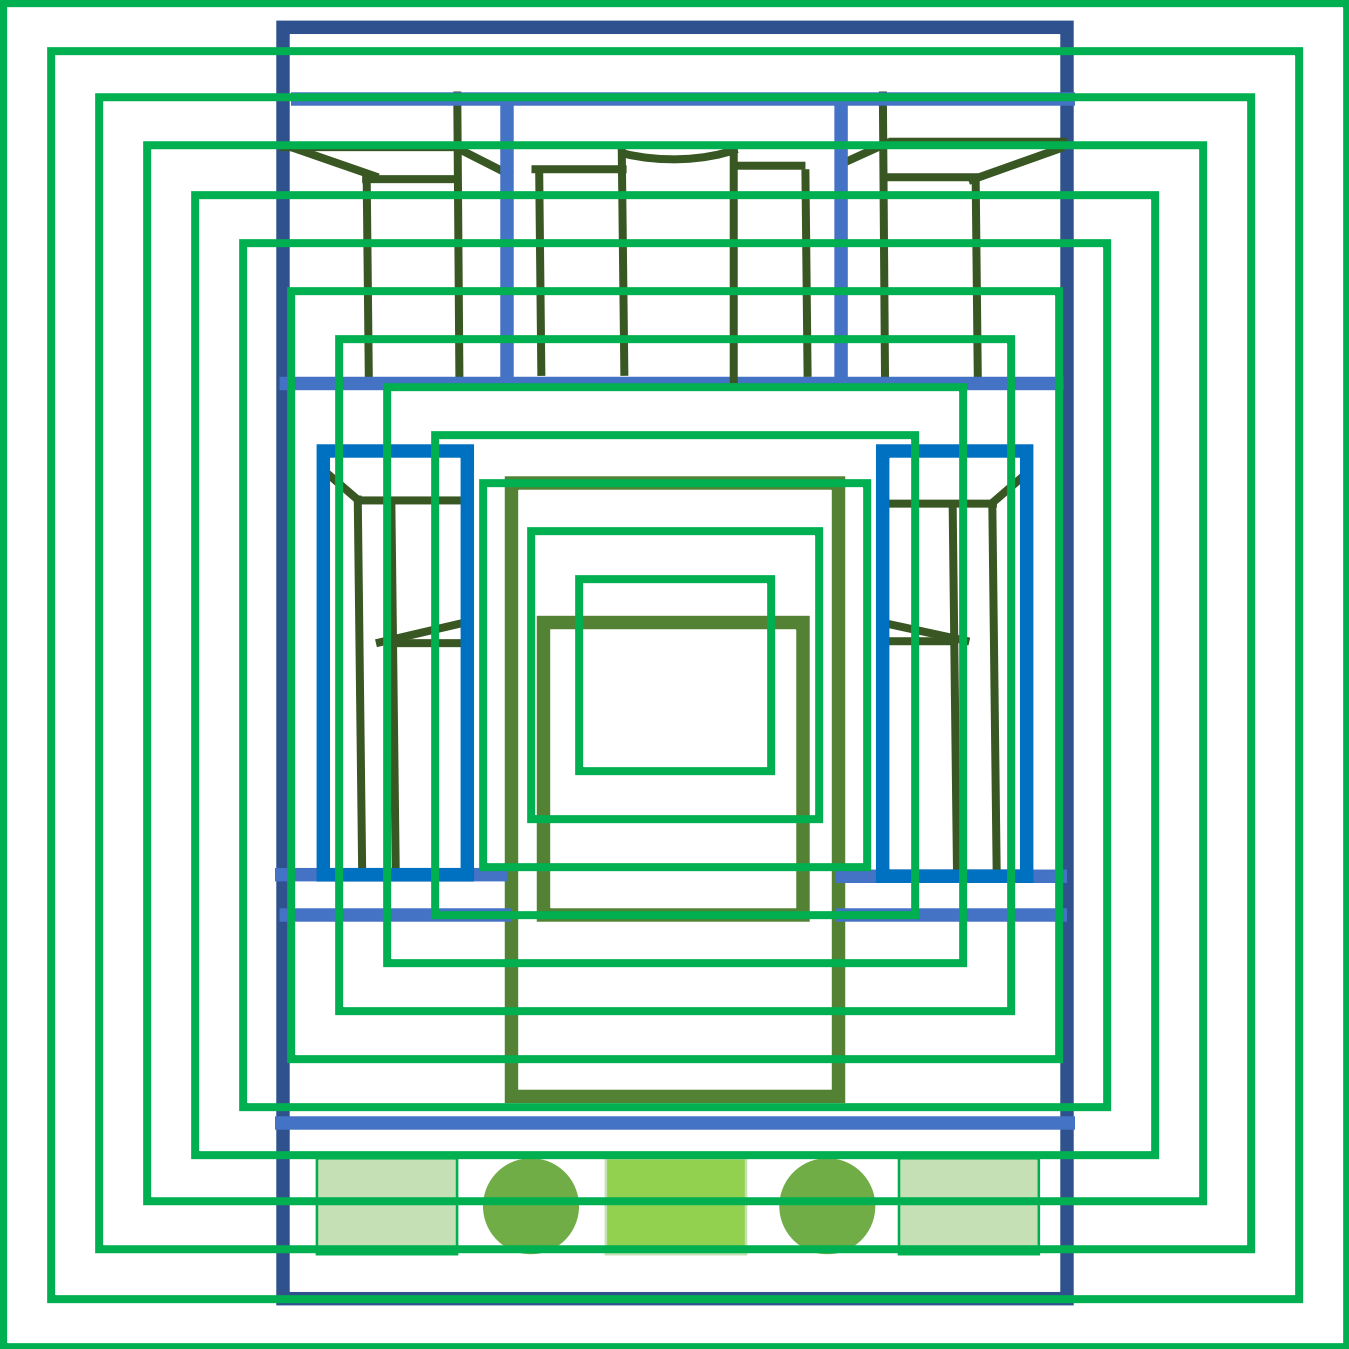



## 2. Vanishing Vertical Axis on Actual Walls ("Surface Geometry")

## House of Augustus

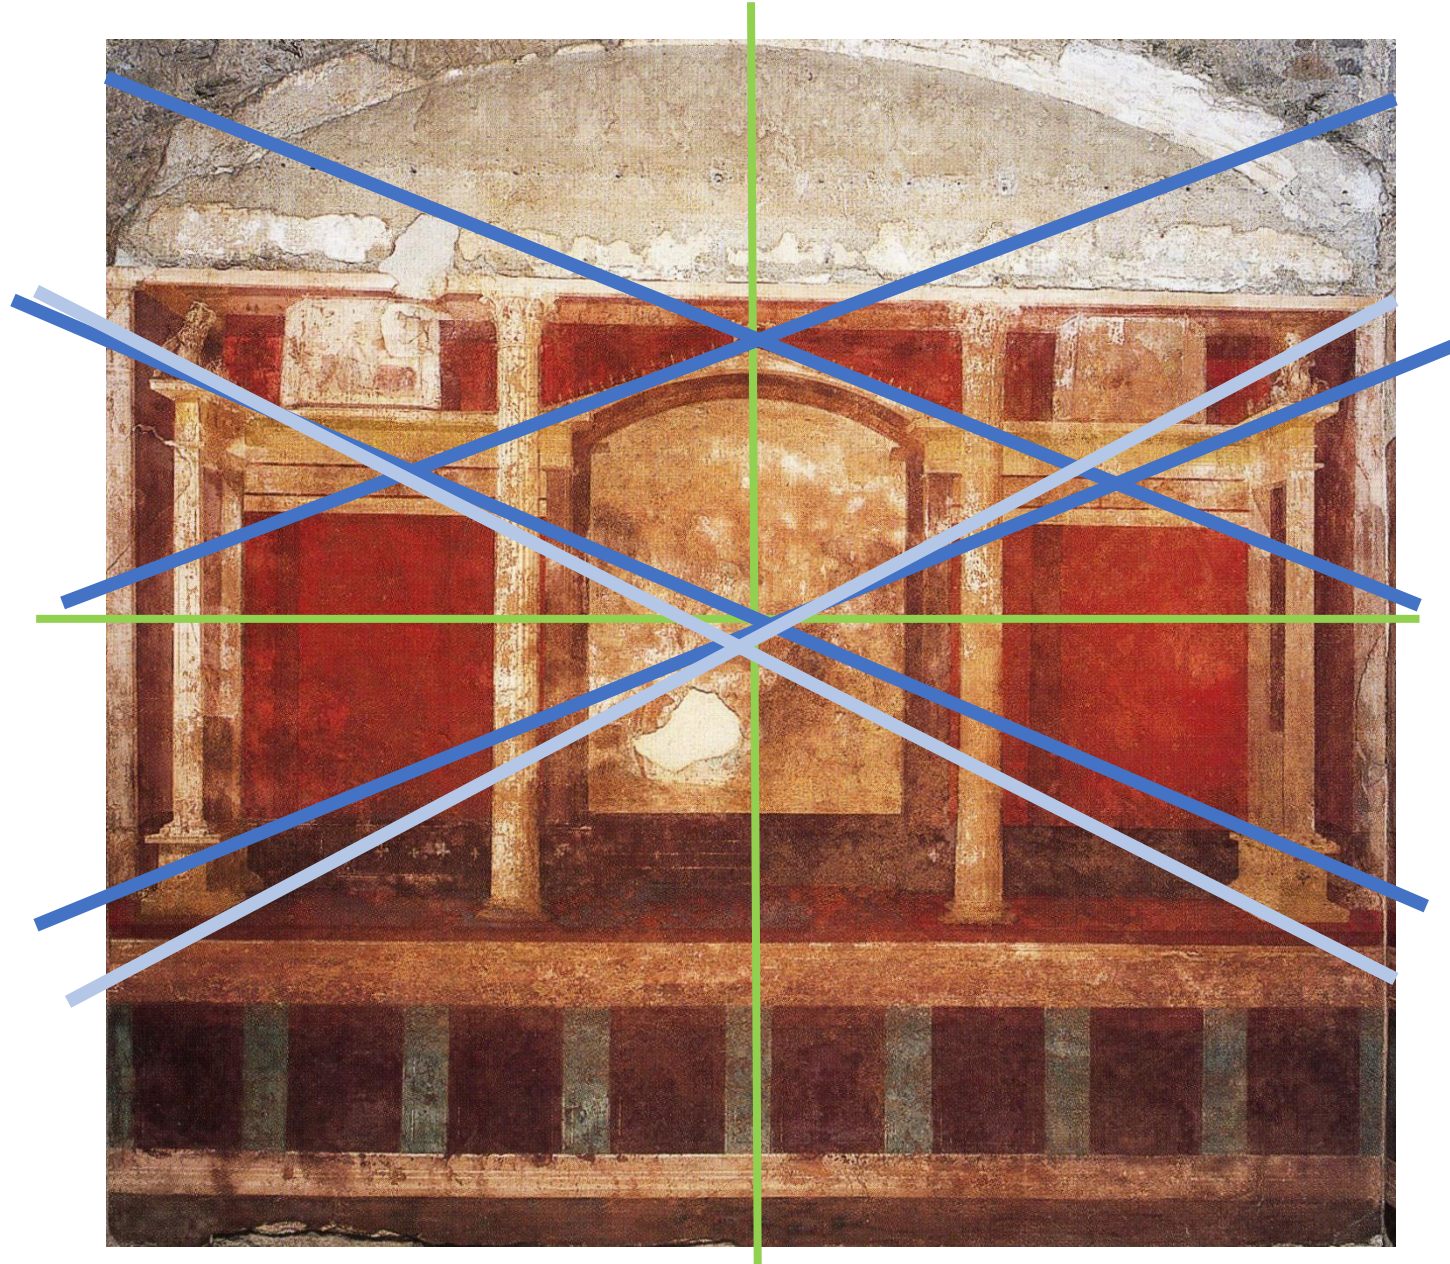

2.1



Oplontis

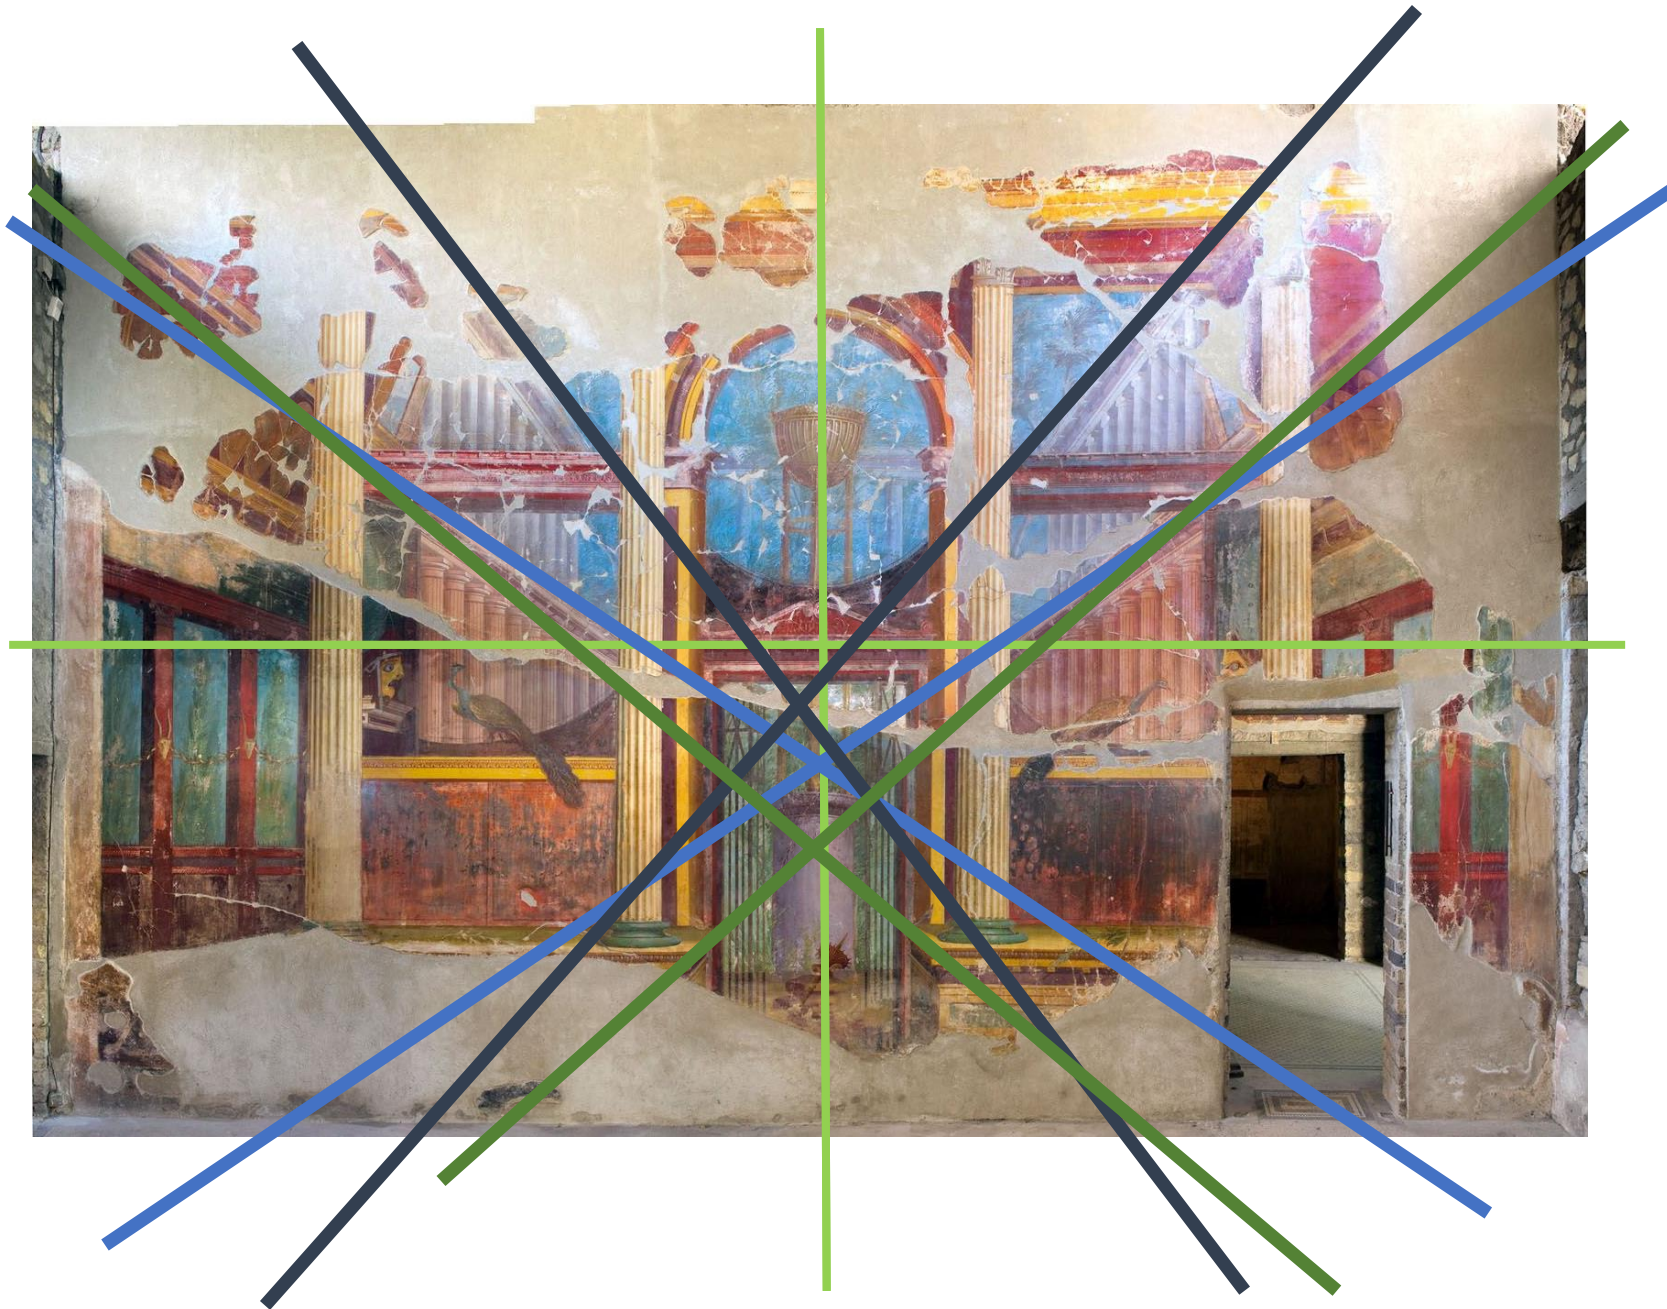

2.2



Boscoreale

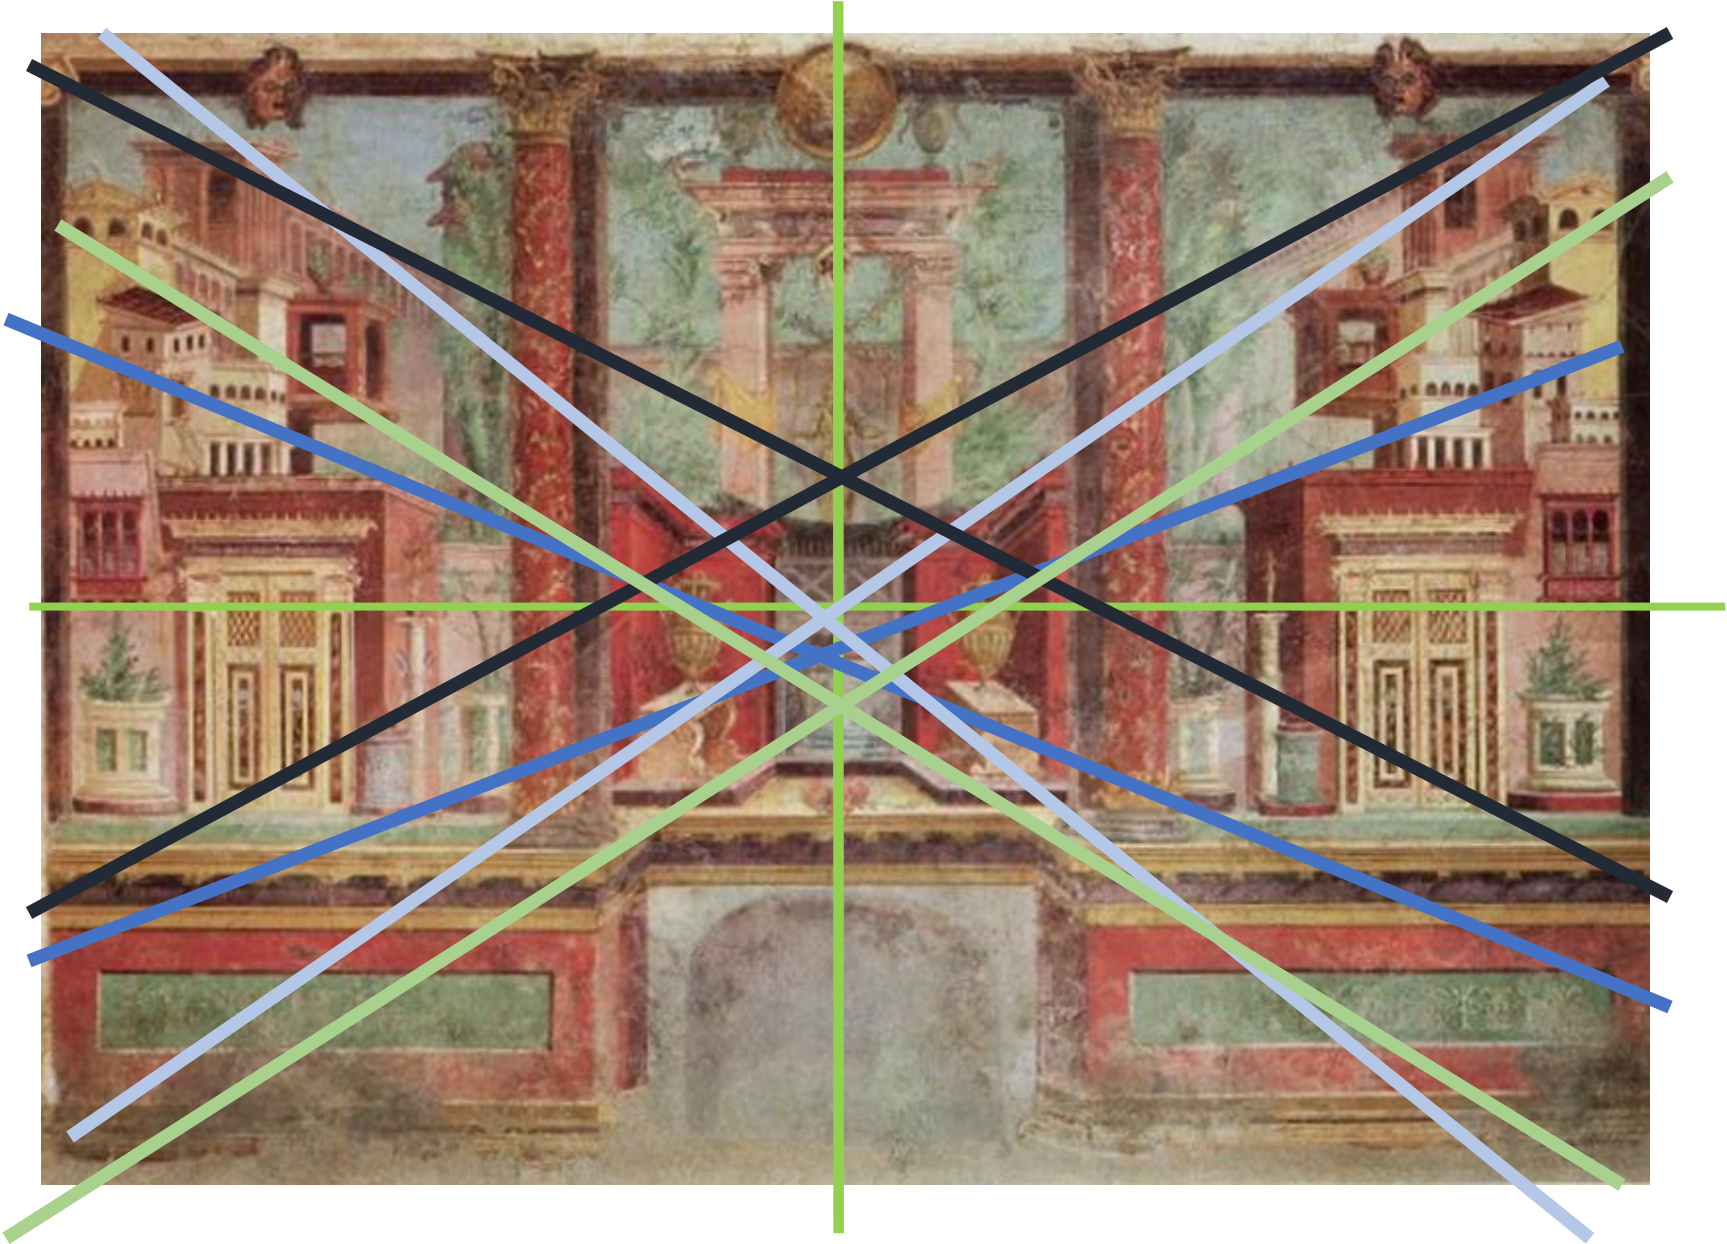

2.3

## Boscoreale

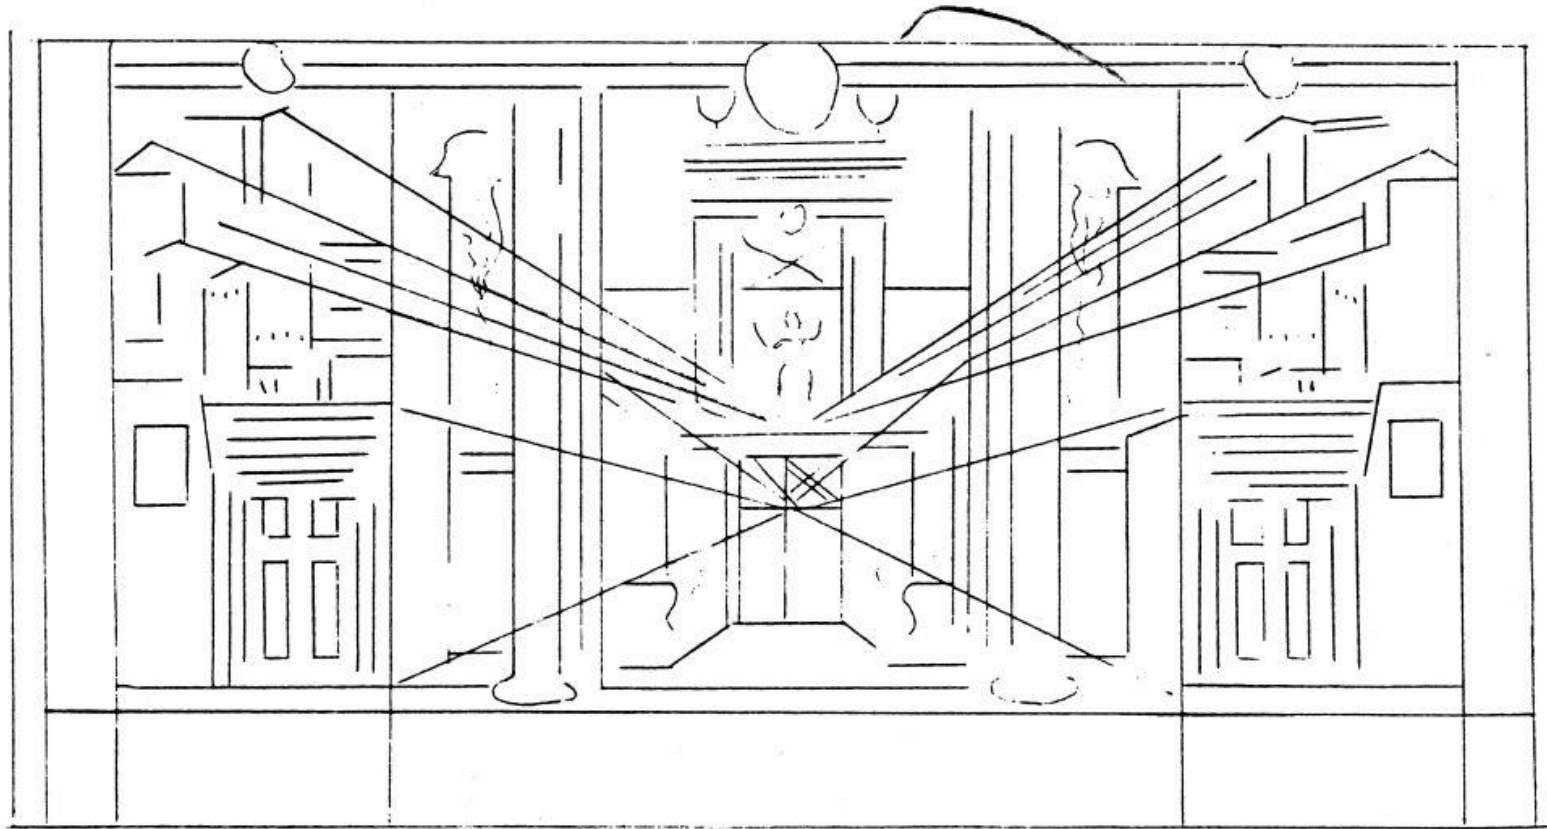

From: Little 1971, plate III, figure 2.

House of the  
Cryptoporticus

2.4

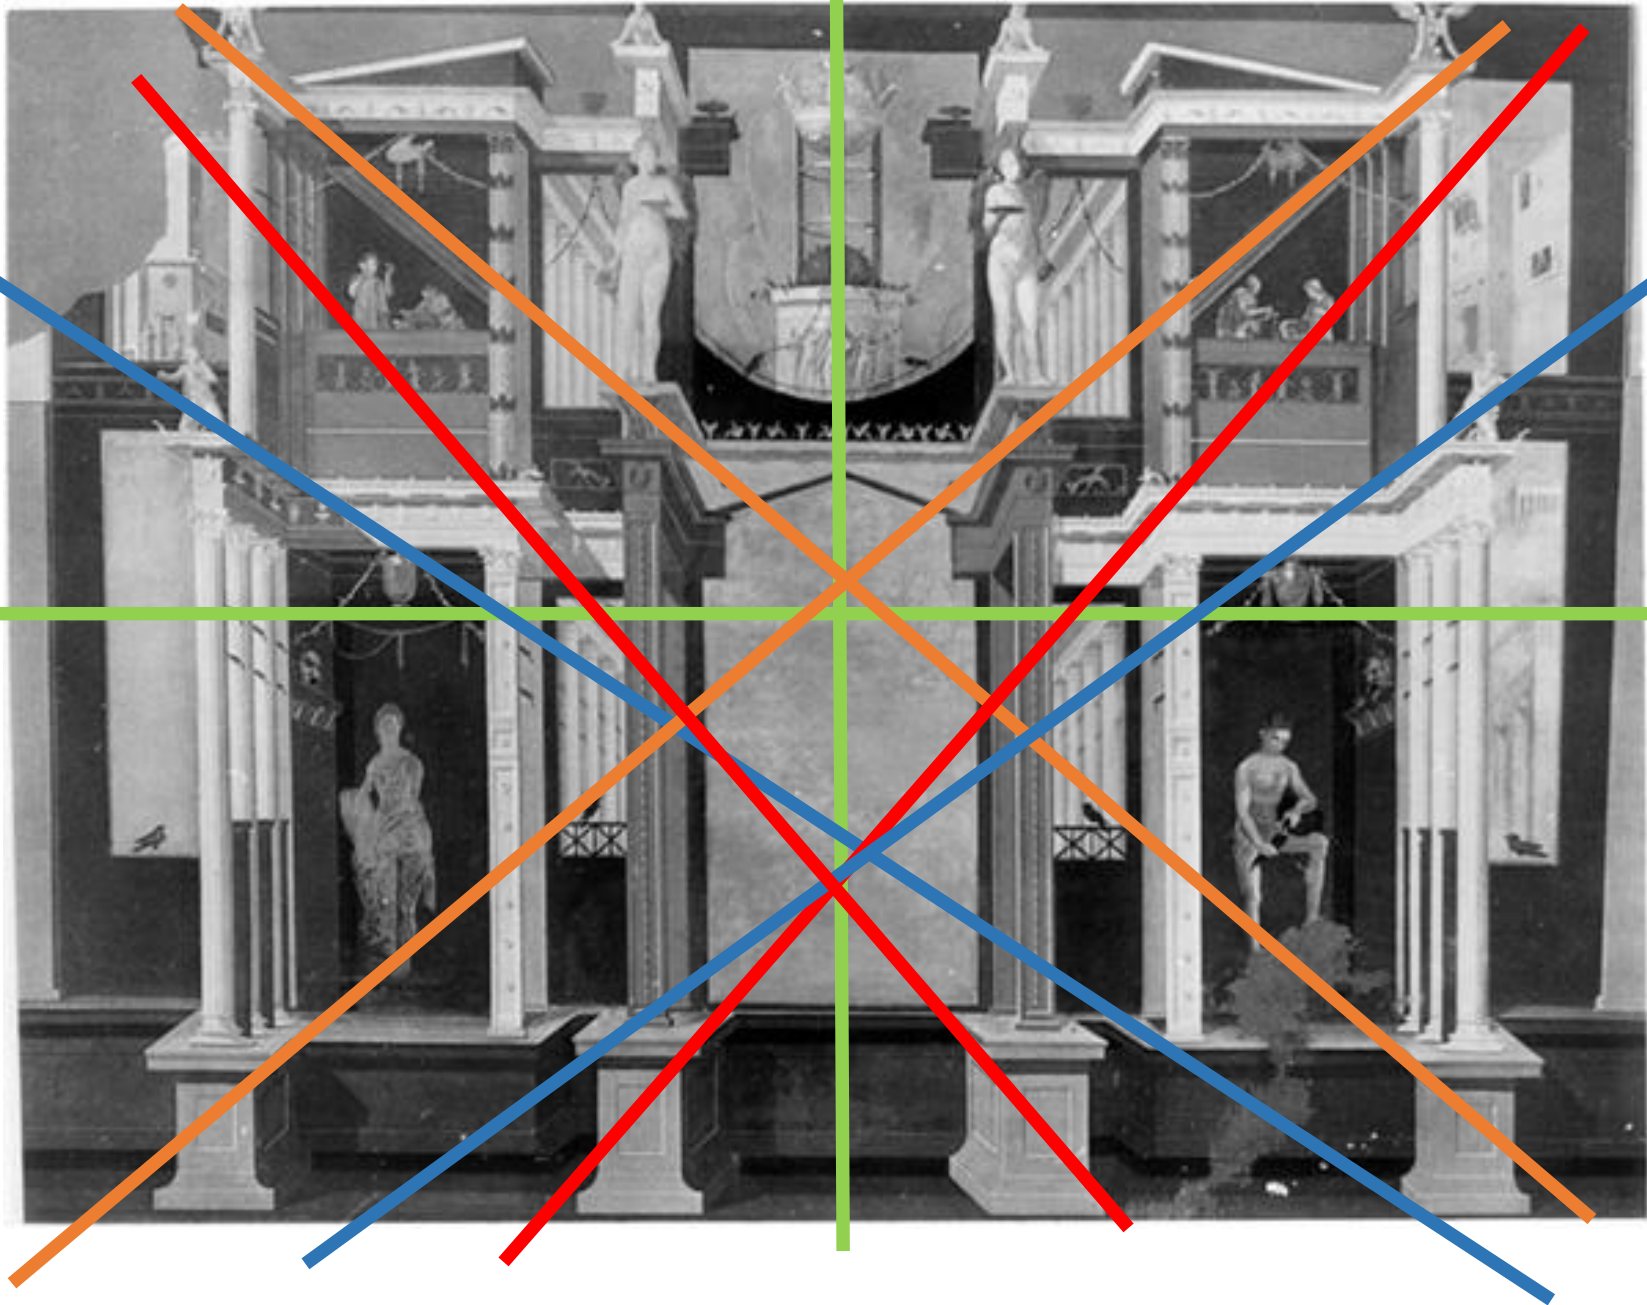



House of Marcus  
Lucretius Fronto

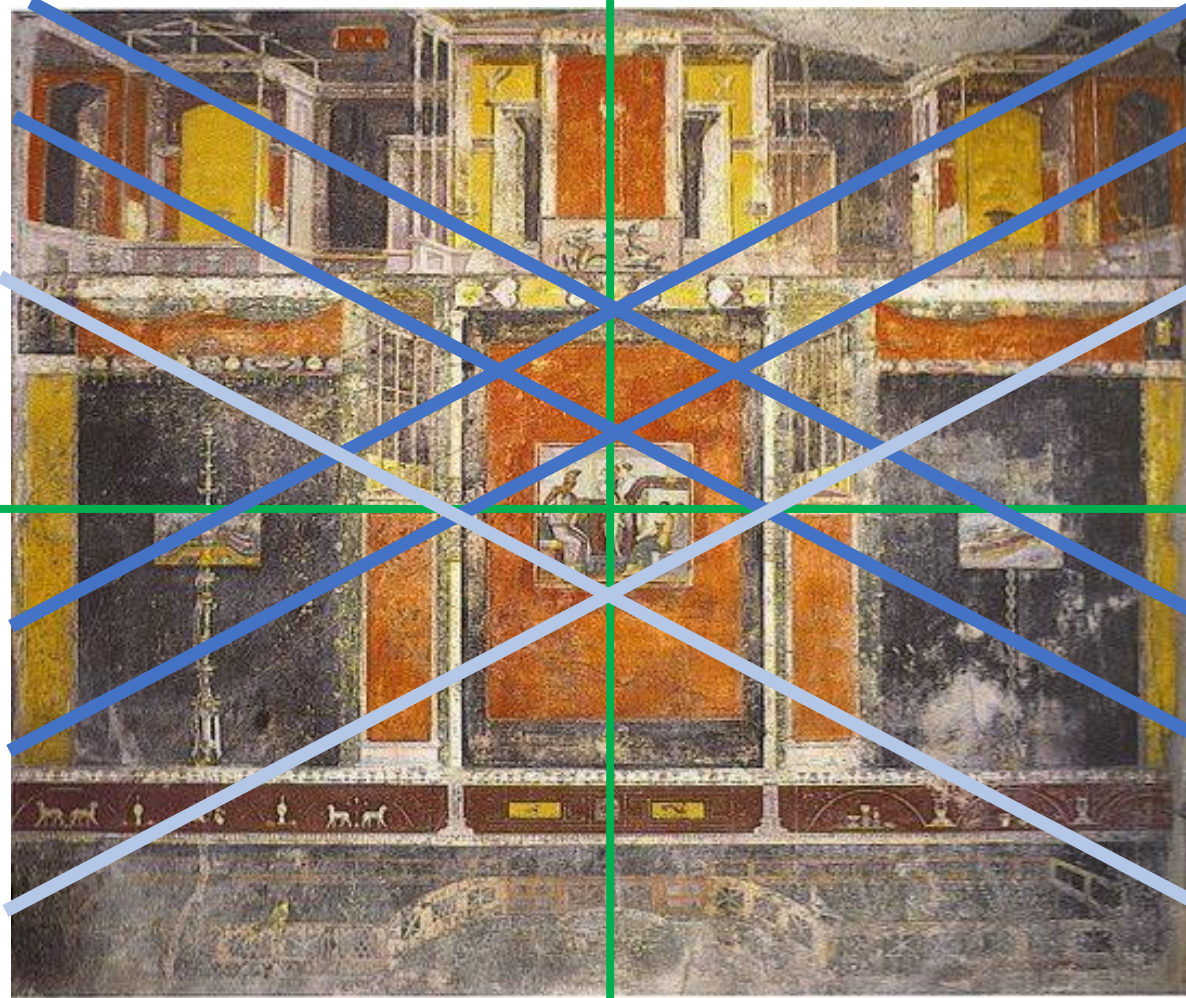

2.5

## House of the Vettii

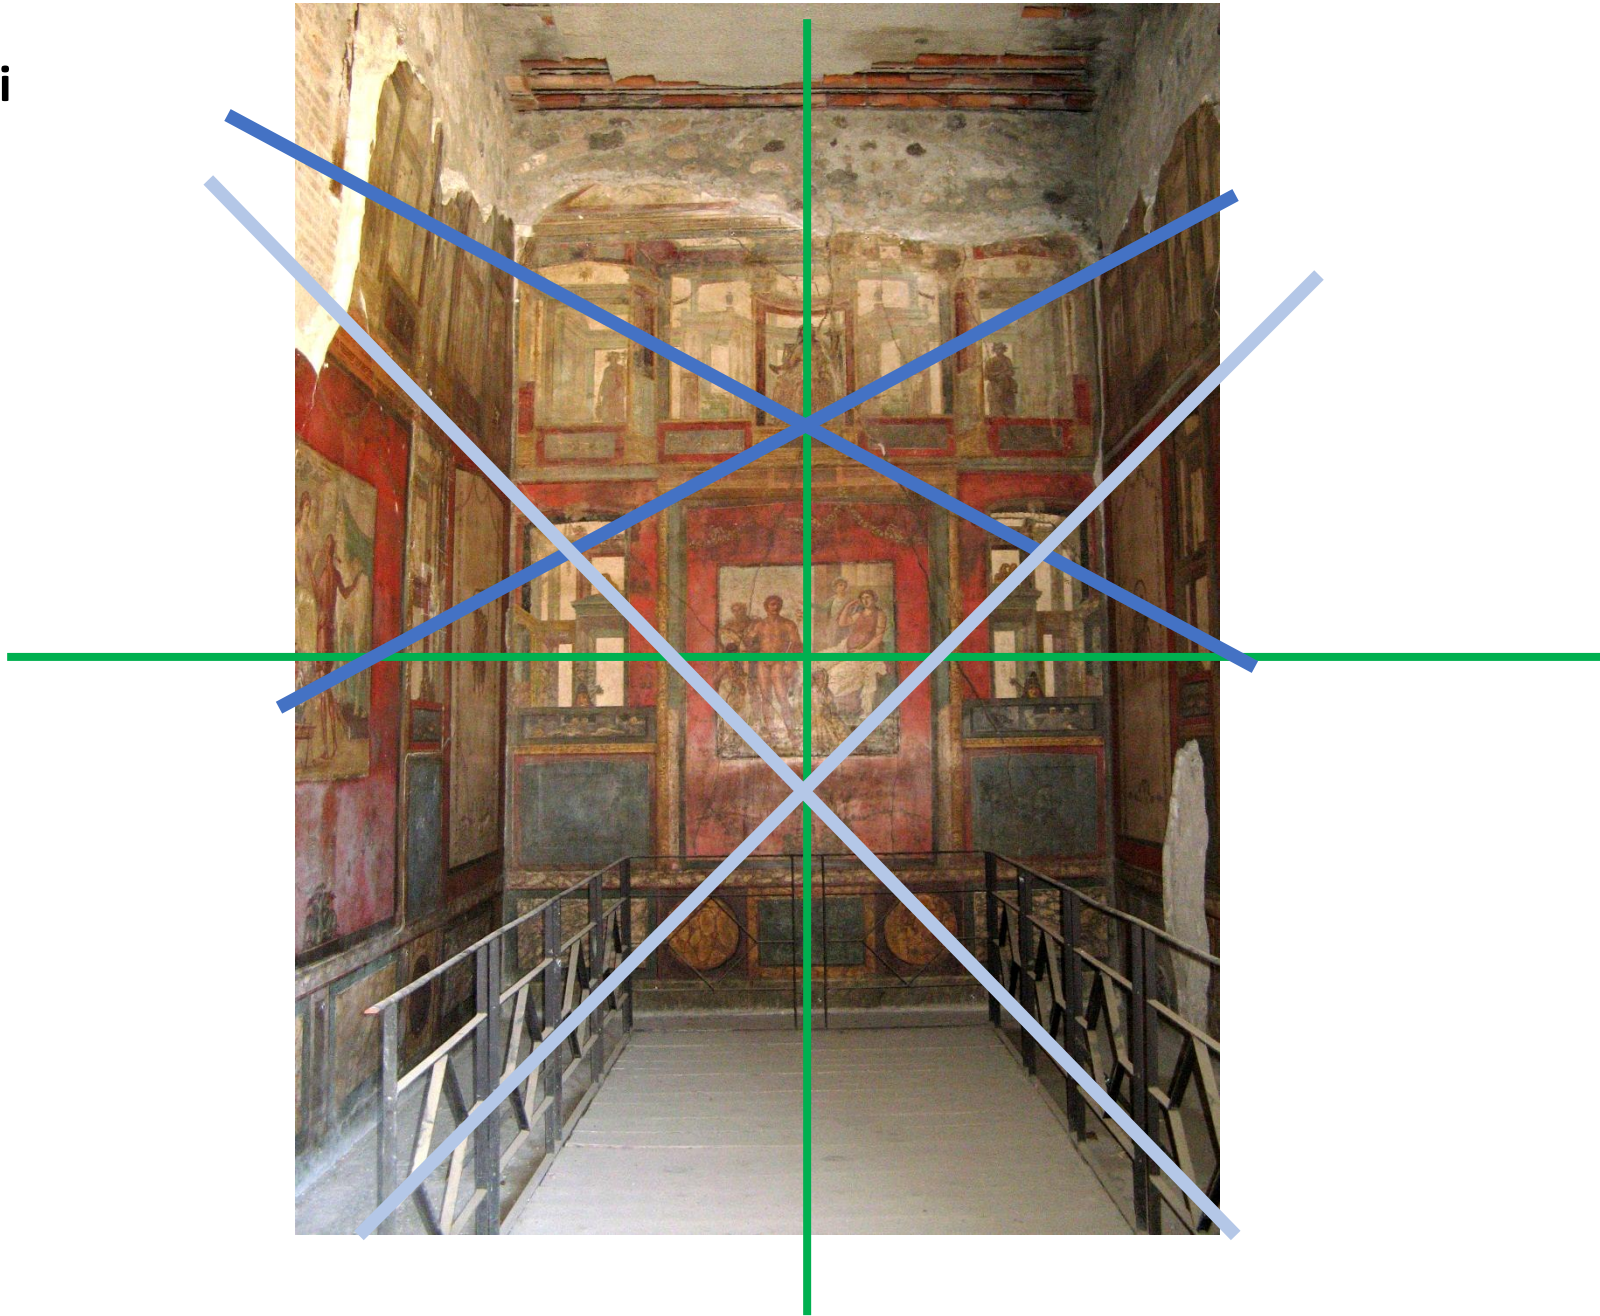

2.6



# 3. Vanishing Vertical Axis On Facsimiles

House of Augustus

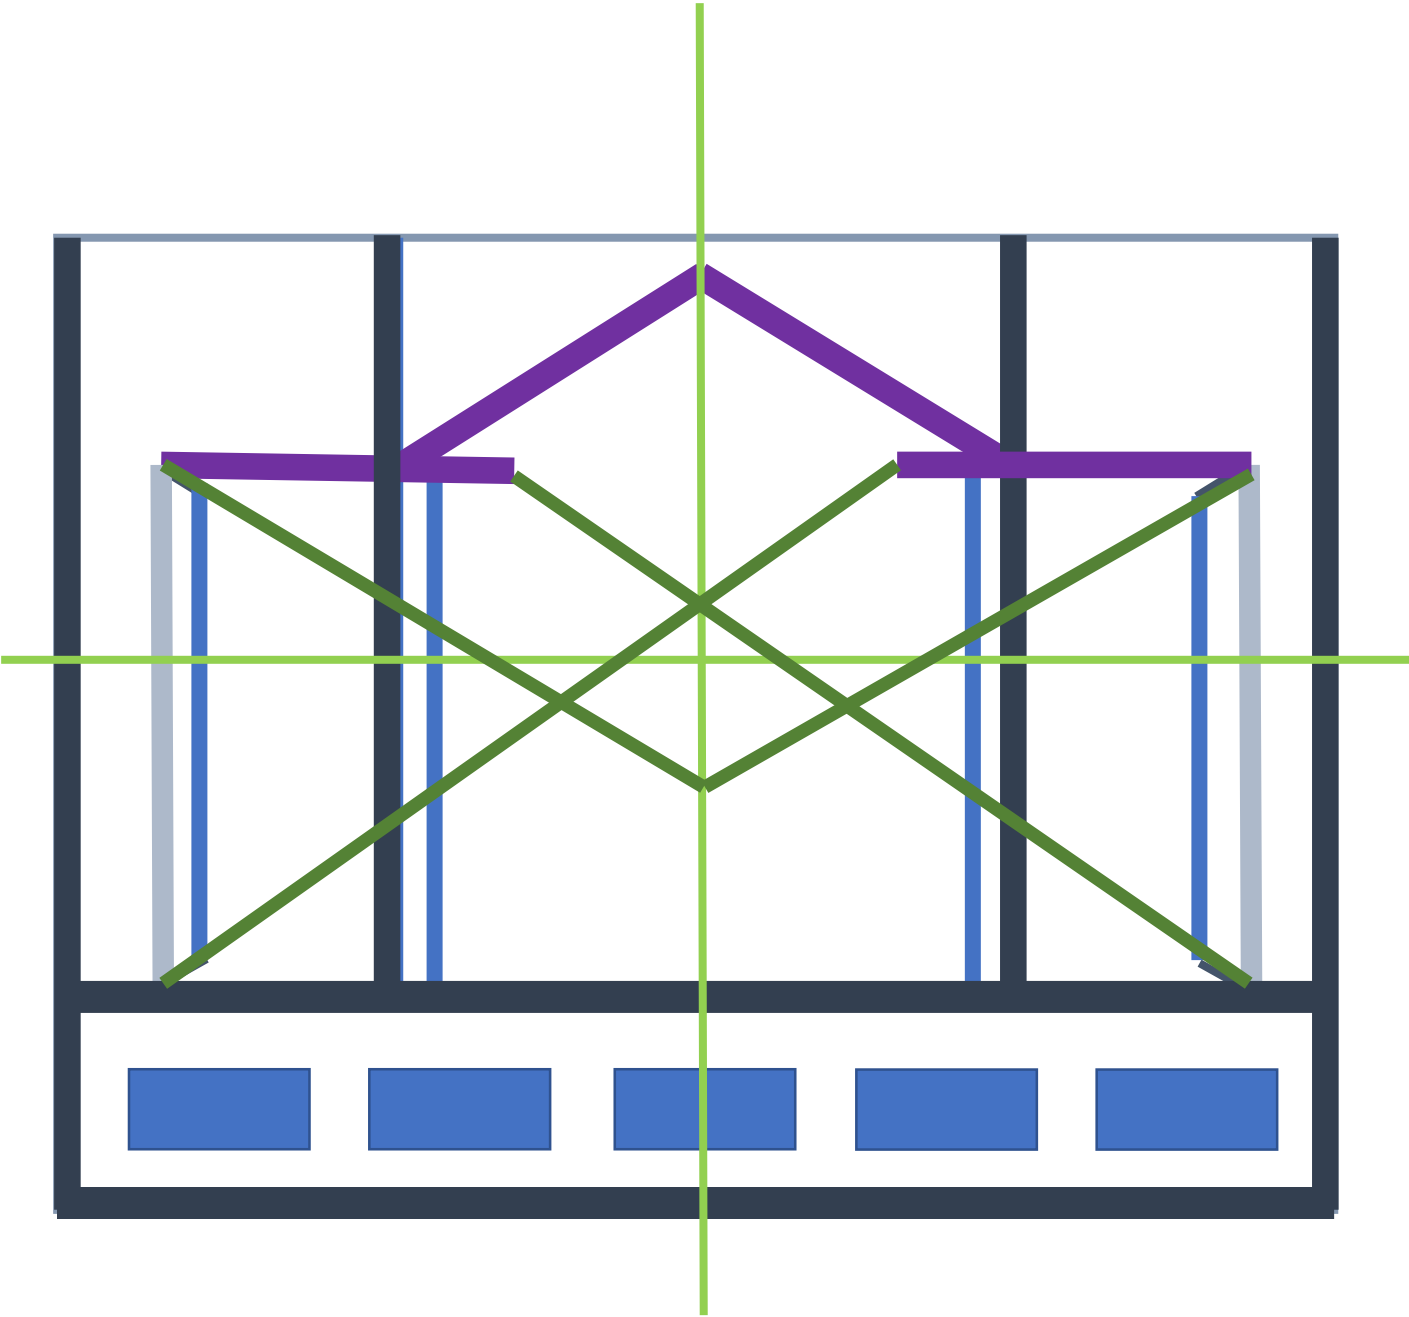

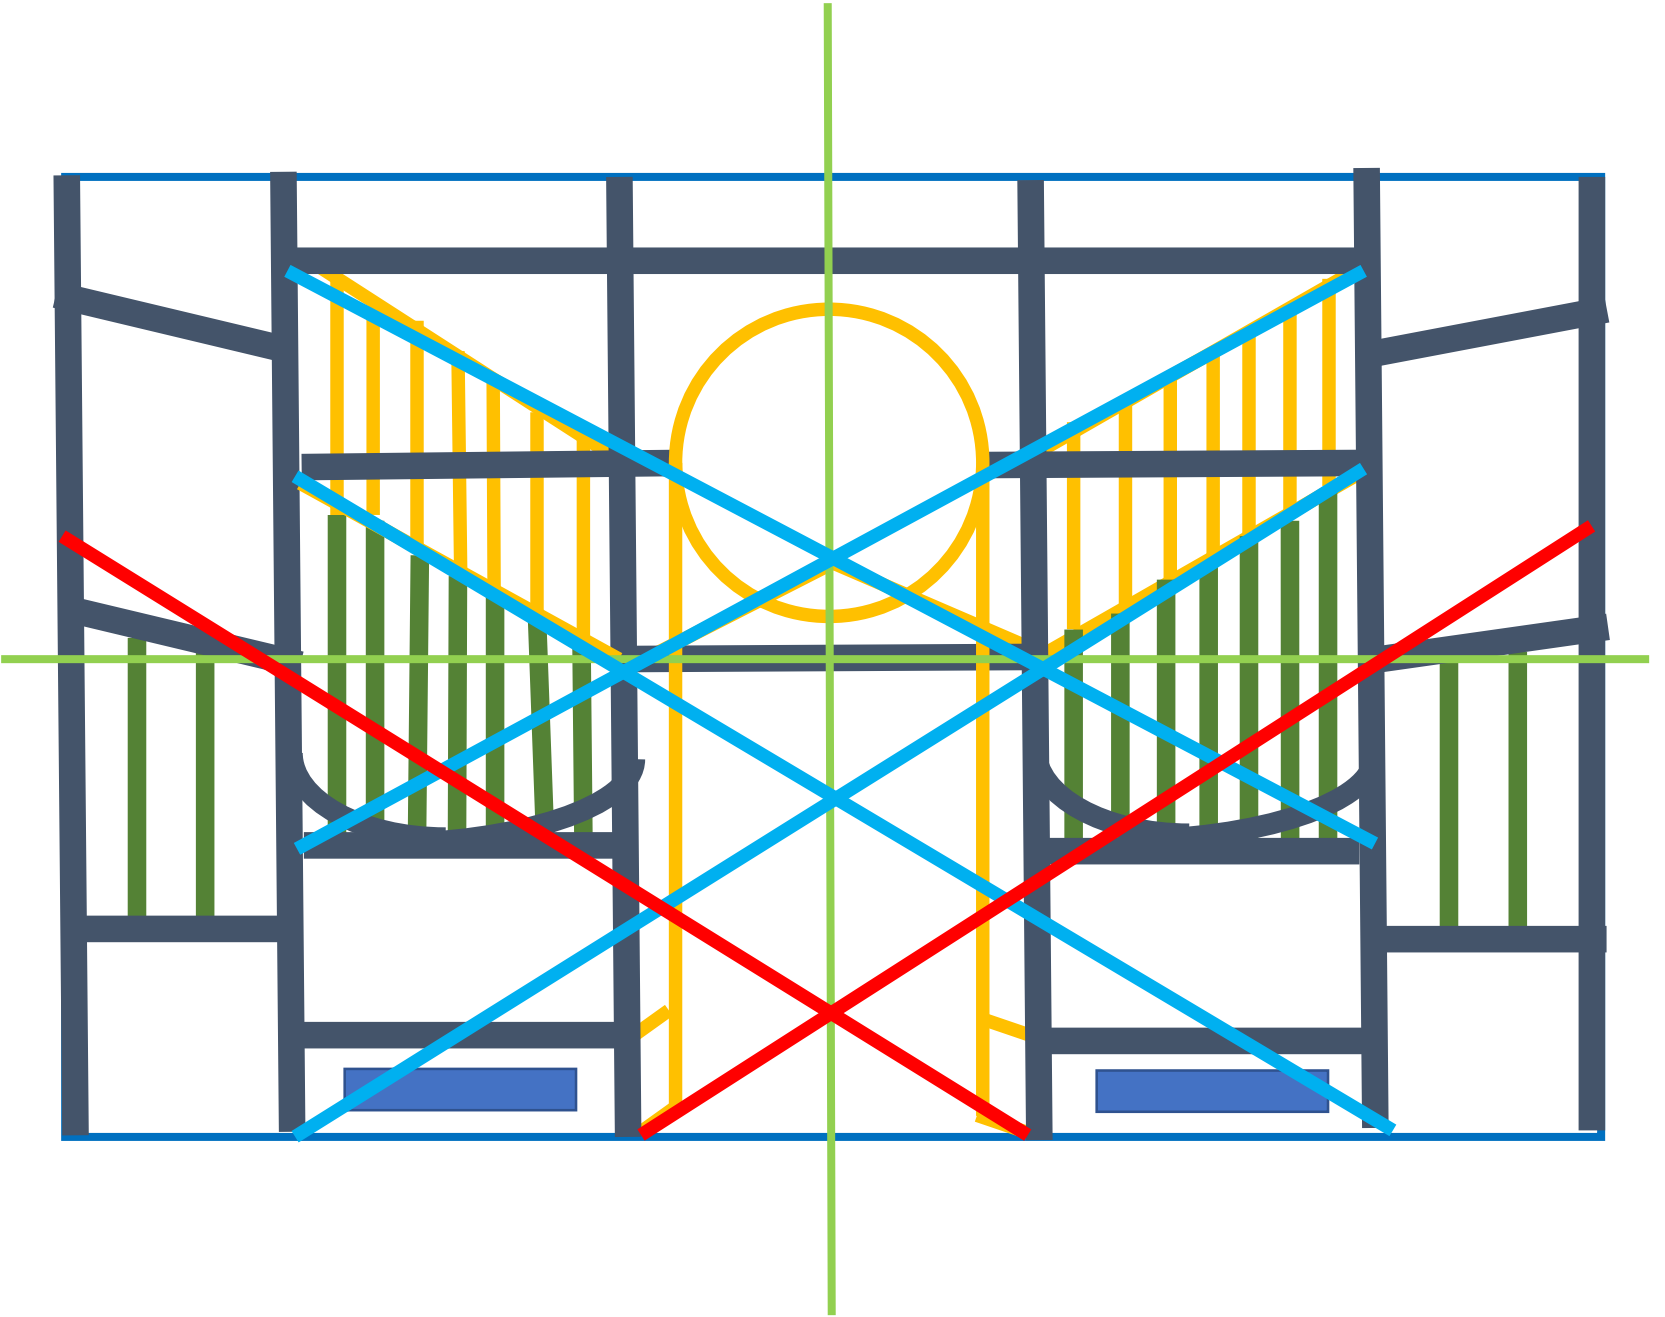

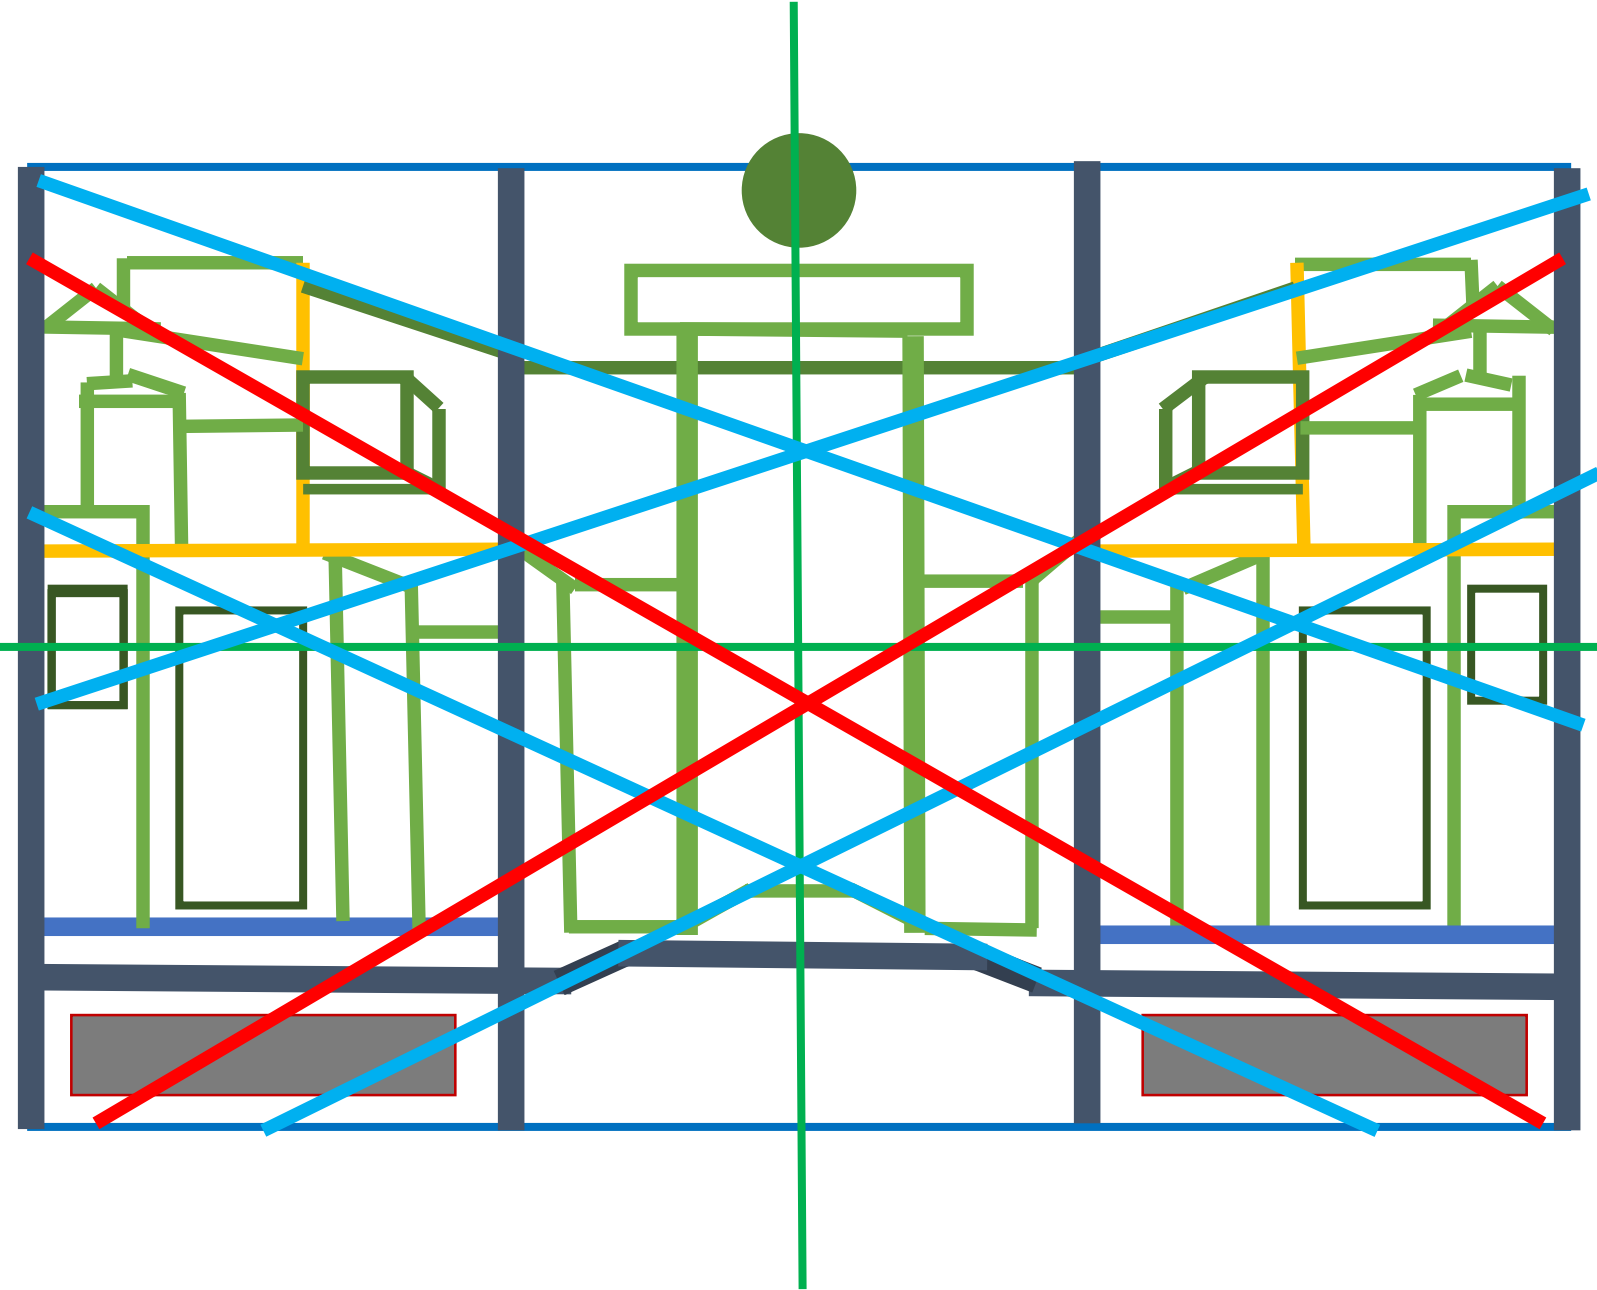

House of the  
Cryptoporticus

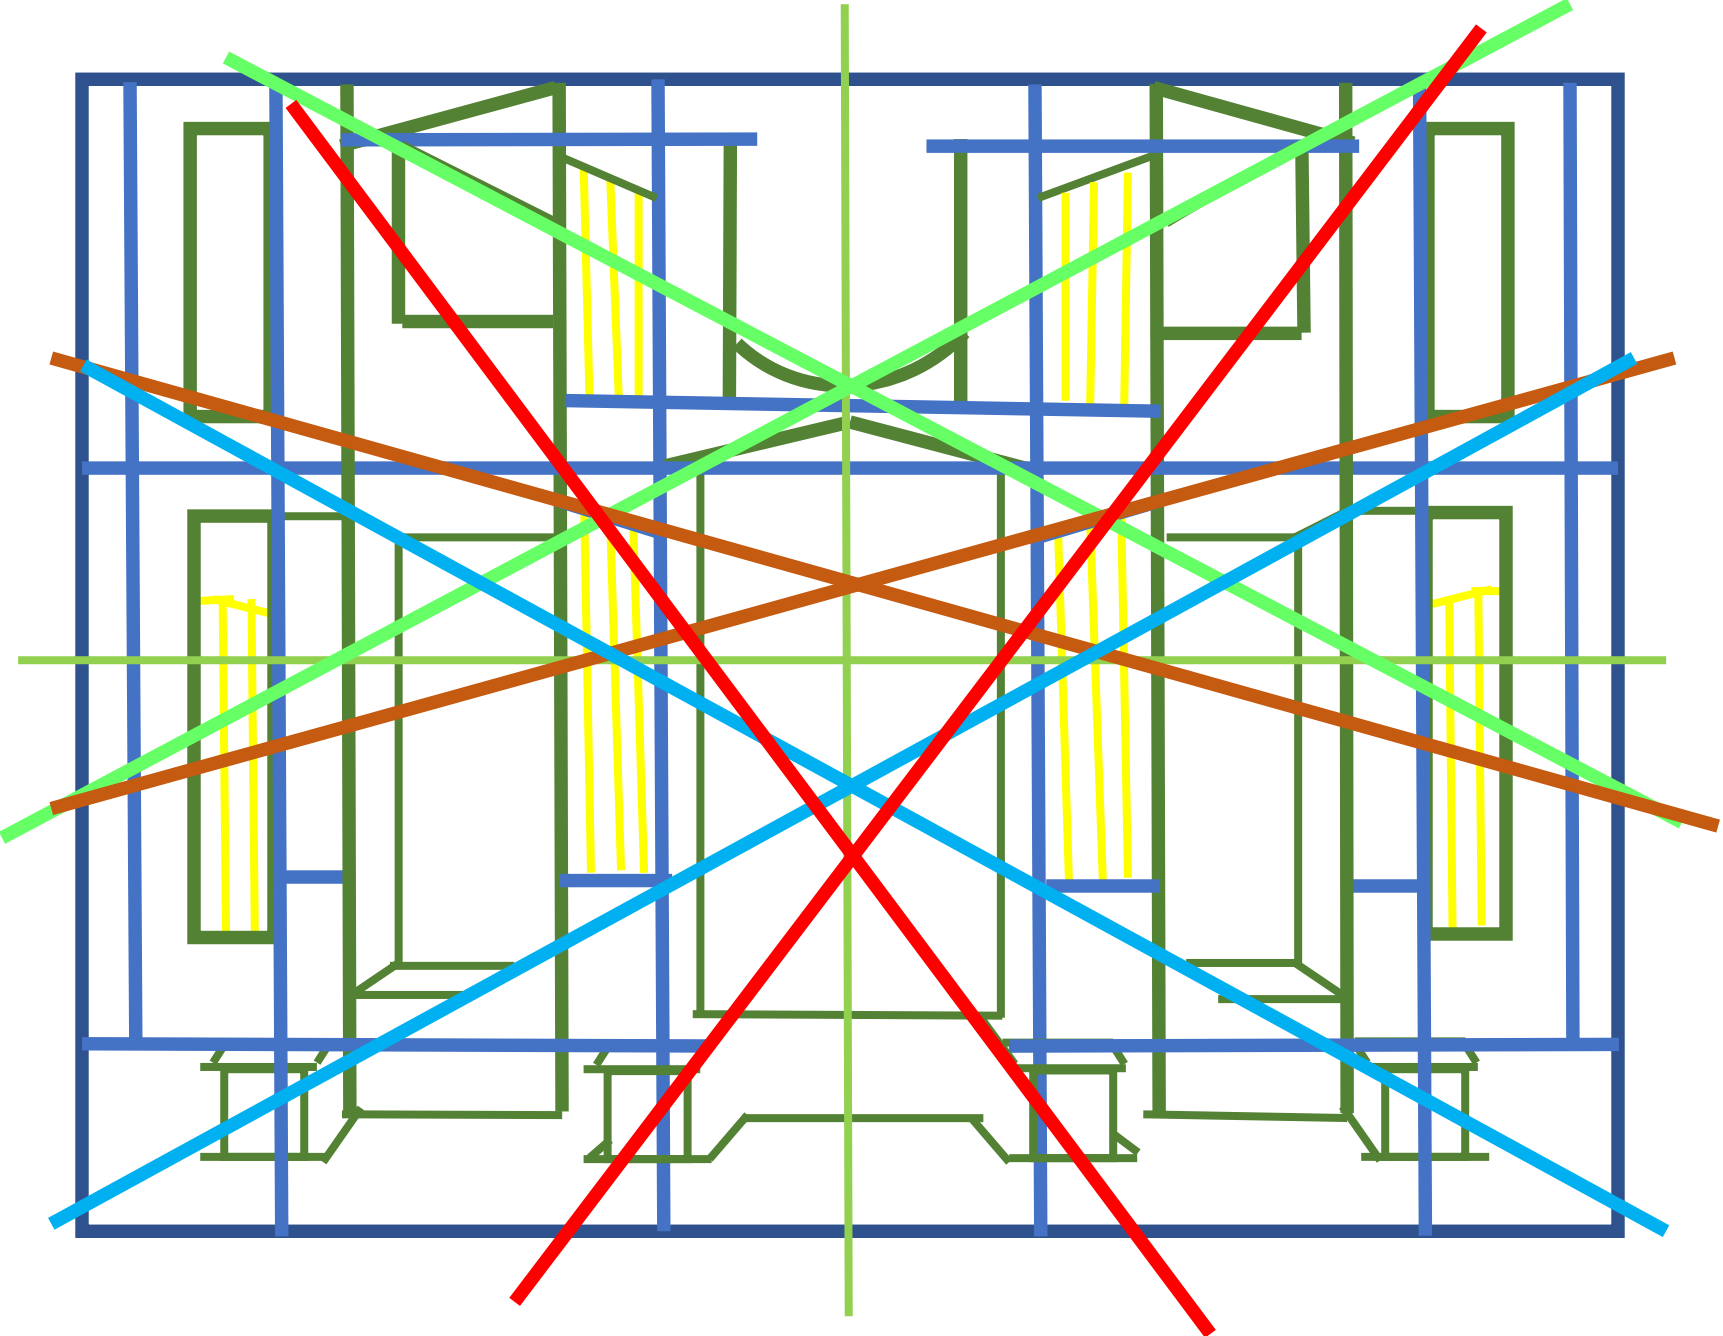

House of Marcus  
Lucretius Fronto

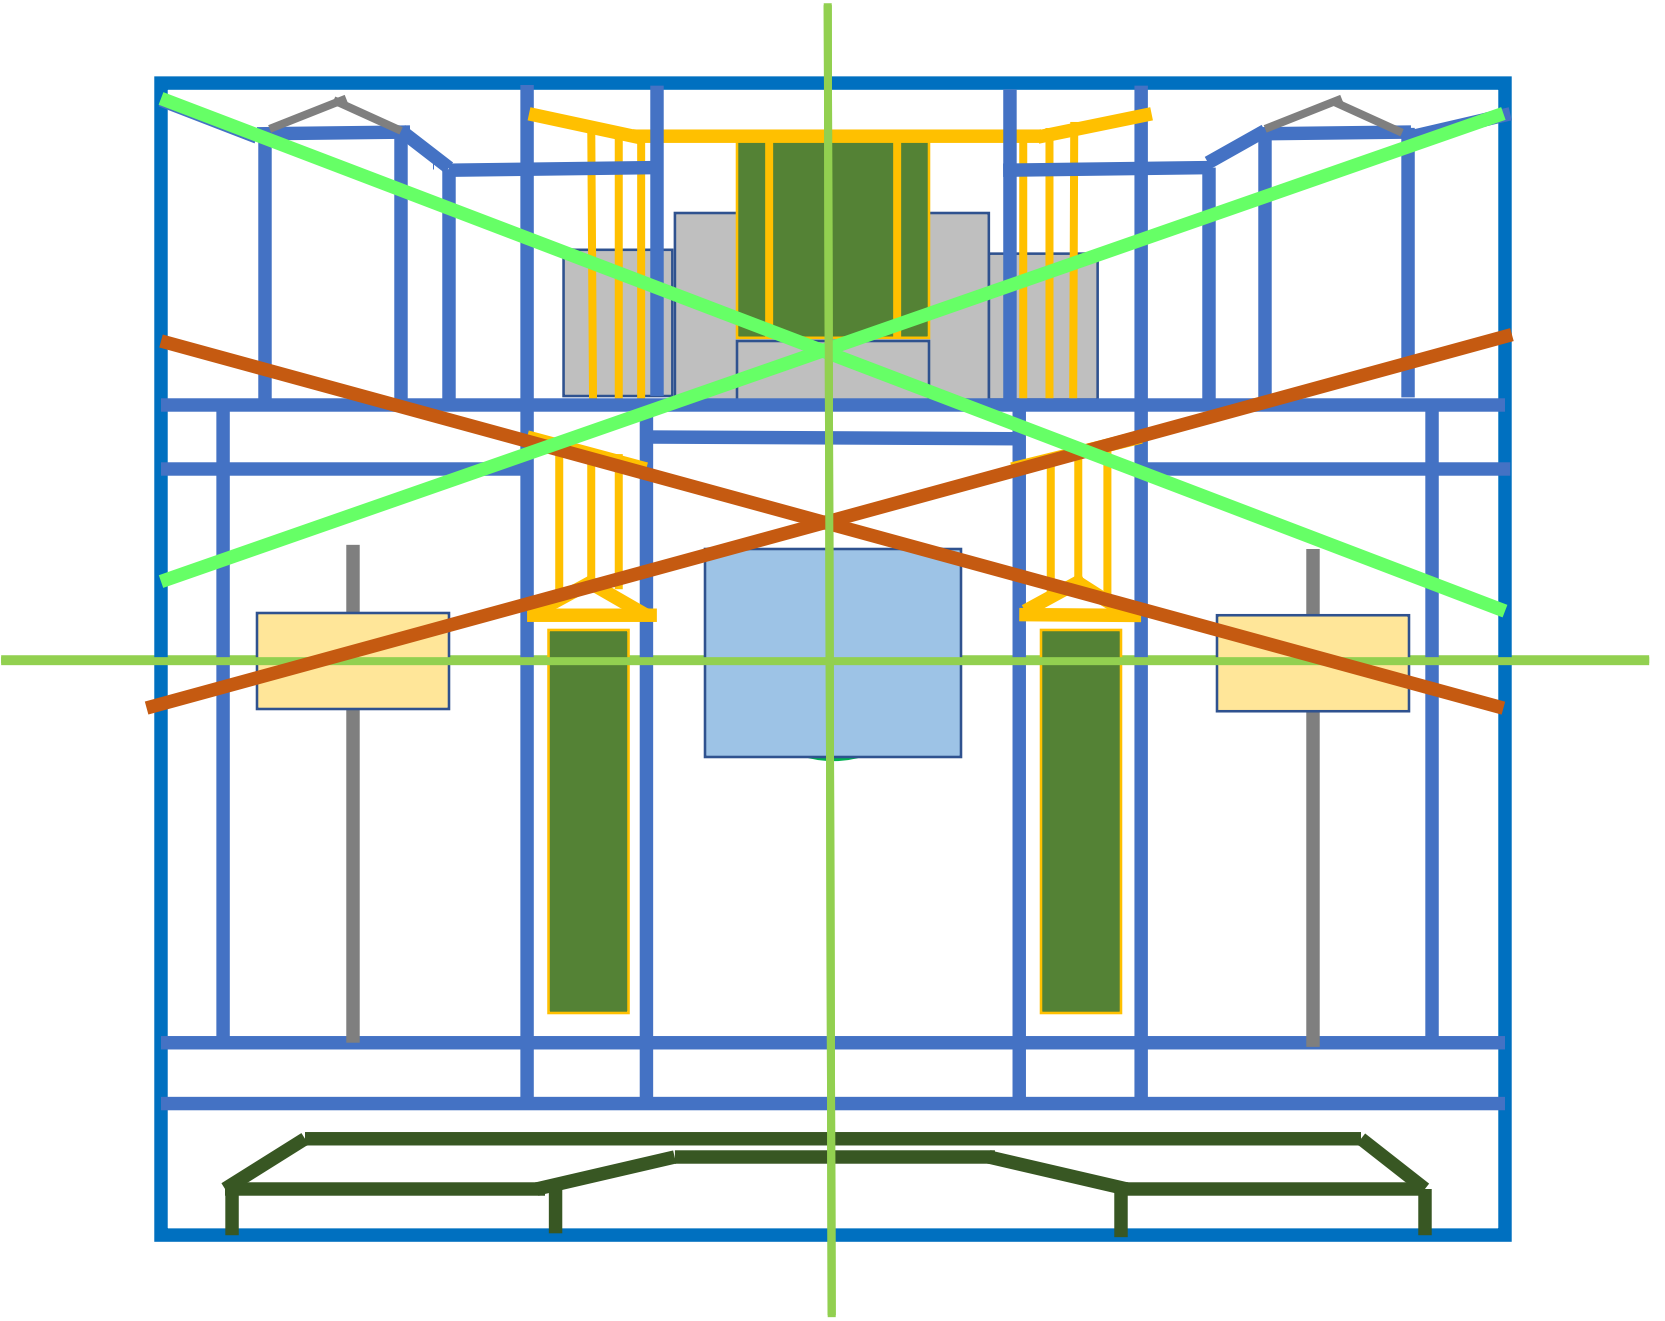

House of the Vettii

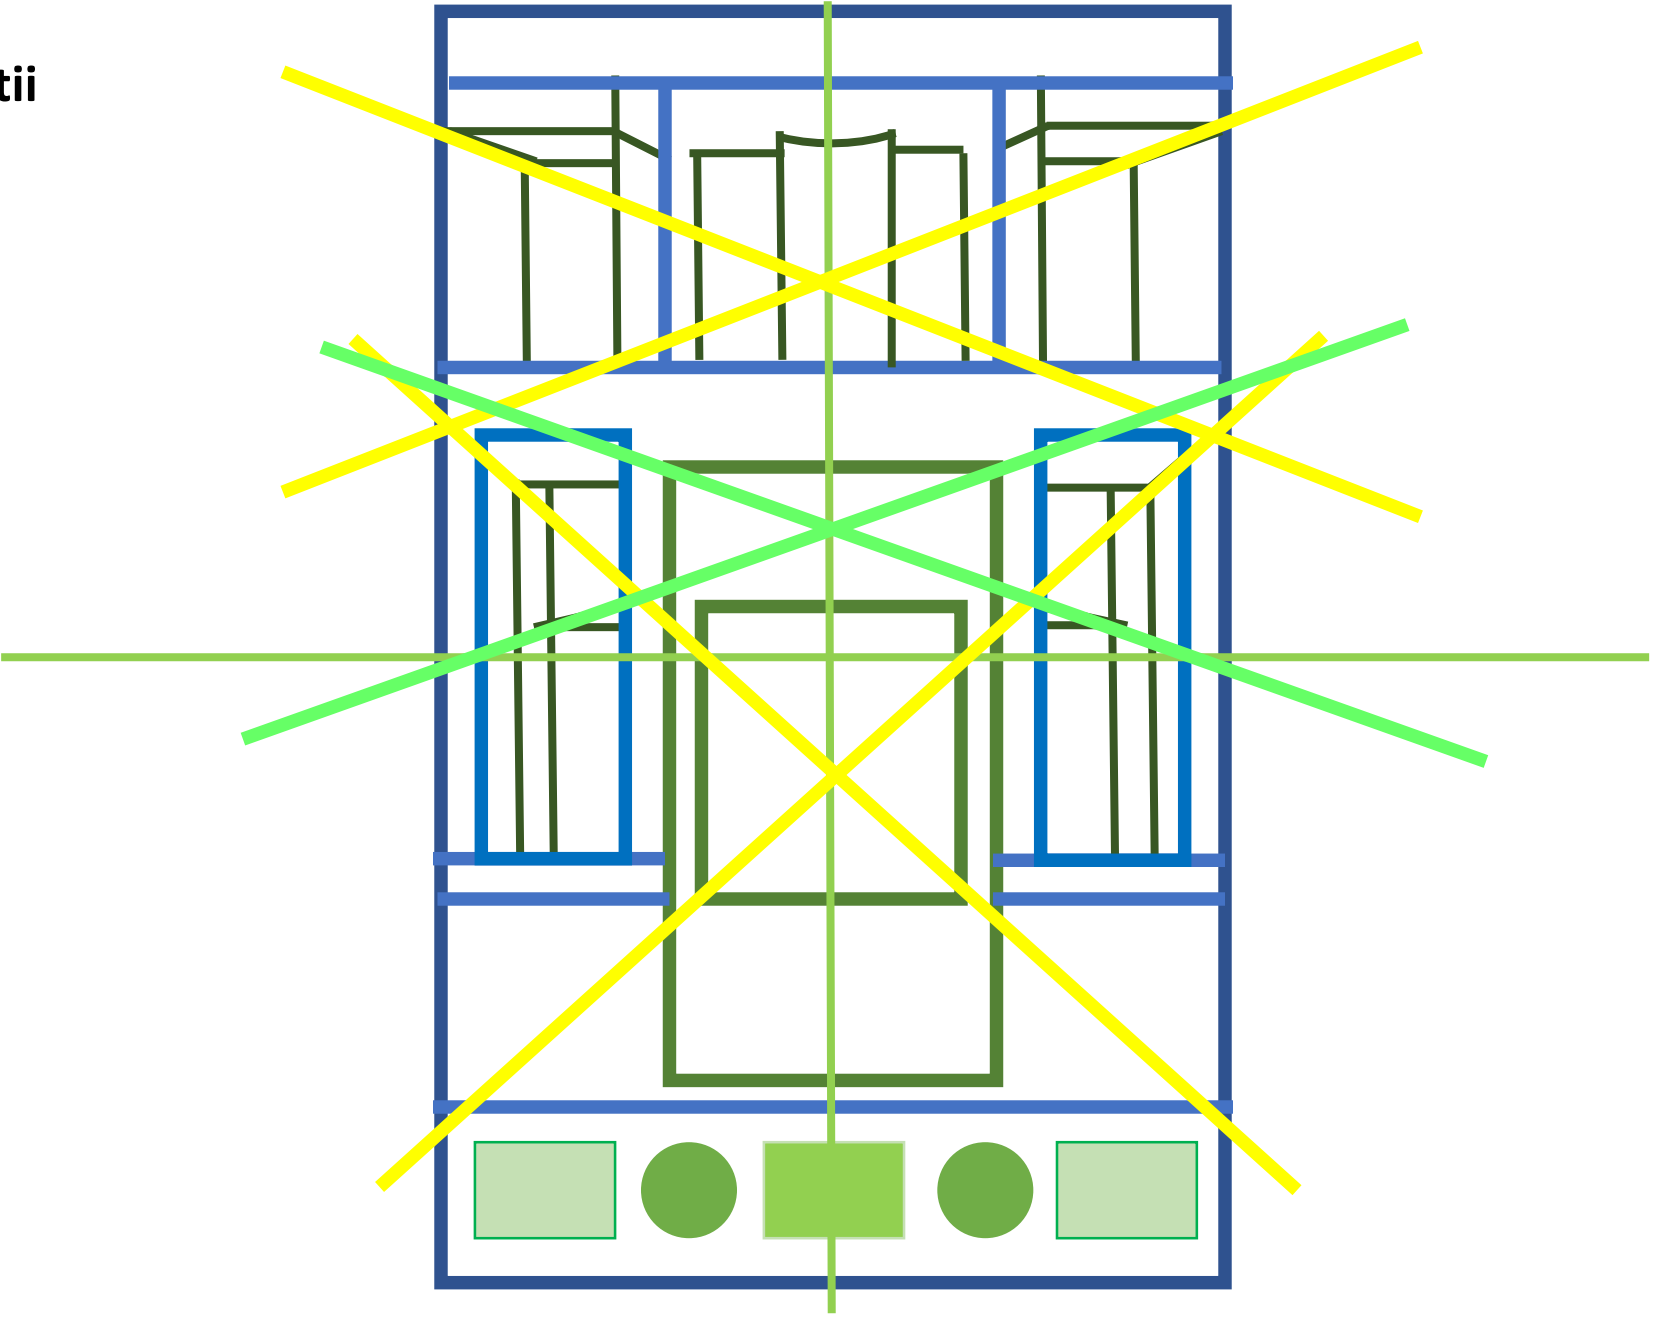

Supplement: s1 [file s1]
