# Supplementary material
Source: MDPI journal article supplement (https://www.mdpi.com/2076-0752/8/3/118)

# **SUPPLEMENTARY 1**

# **FACSIMILES**

# List of Facsimiles

## Second Style

[Boscotreale — Cubiculum — See text.]

1. Oplontis — Room 15, East Wall

Slides 5-10: detailed analysis for design of columns

2. House of the Cryptoporticus (Pompeii) — Frigidarium

## Third Style

3. House of M. Lucretius Fronto (Pompeii) — Tablinum

## Fourth Style

4. House of the Vettii (Pompeii) — Triclinium

## GENERAL COMMENTS

1. These are *facsimiles*, not reproductions. In other words, they are not exact replicas, because their purpose is solely to demonstrate that the system of circles works. Hence the final facsimile in each set should sufficiently resemble its model to be easily recognizable.
2. Second Style has more walls than the other styles, because its walls are complex and often cited by scholars.
3. Colors used were chosen arbitrarily. I was only concerned about how well the “line drawings” reflected the design of the original walls.
4. All sets end with a clean up. That is, extraneous guidelines are removed, all parts are examined to make sure they “fit”, etc.

# **Second Style**

## **1. Oplontis**

Room 15, East Wall

East wall of Room 5/15

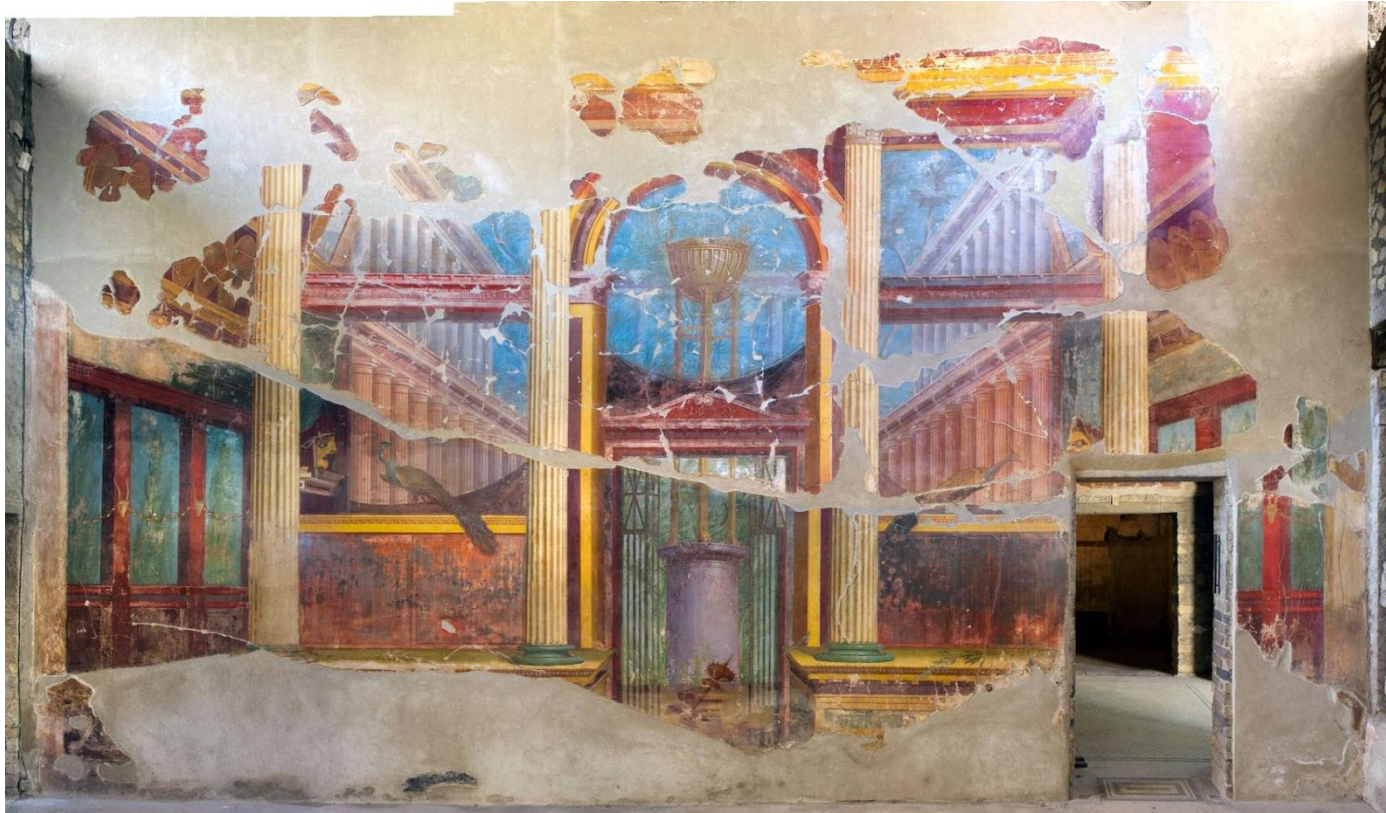



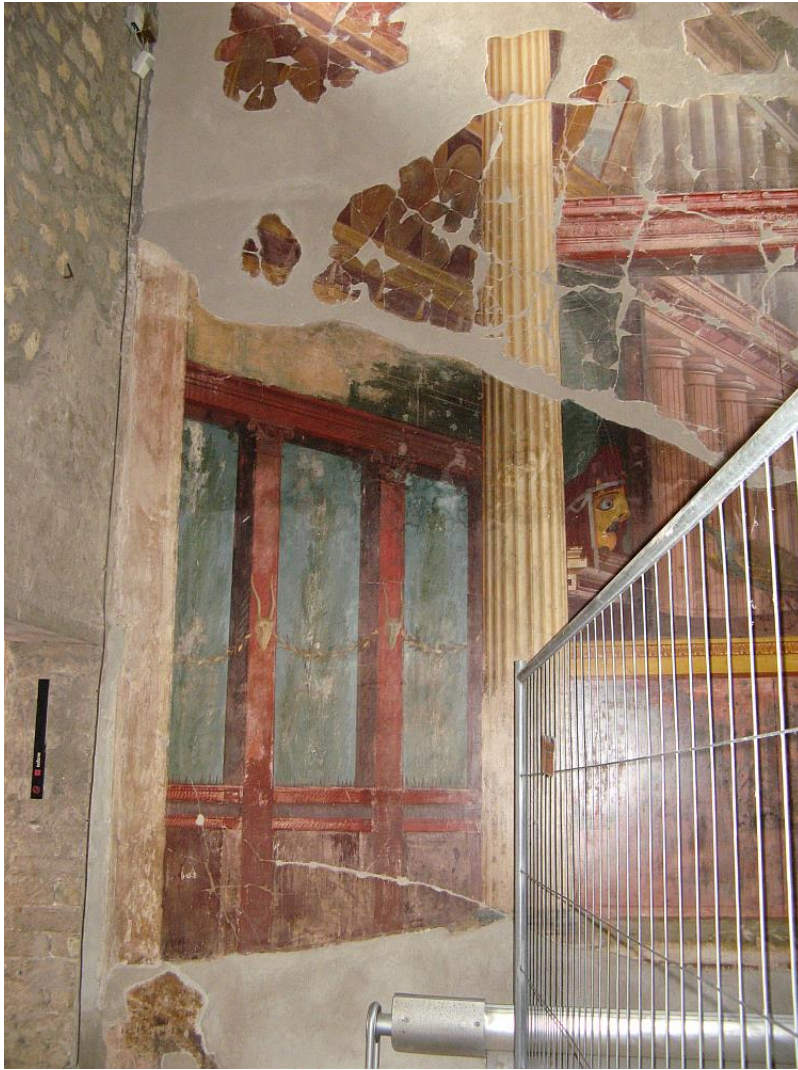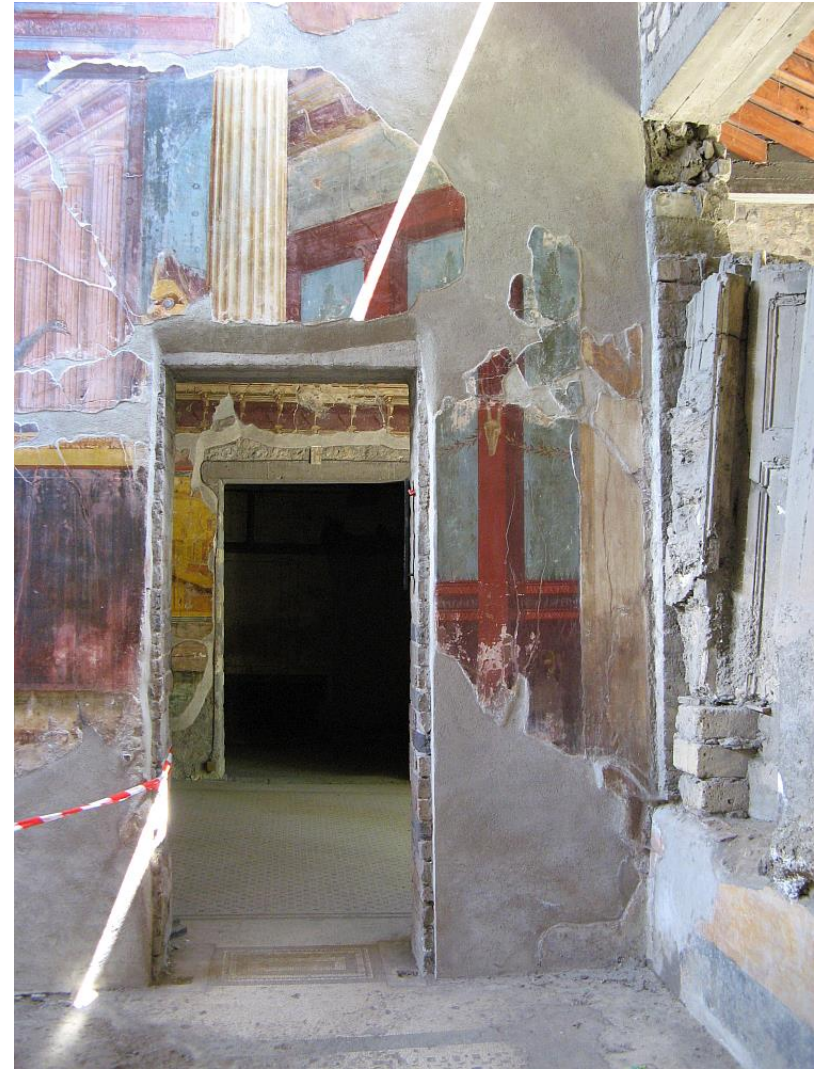

Left- and rightmost sections

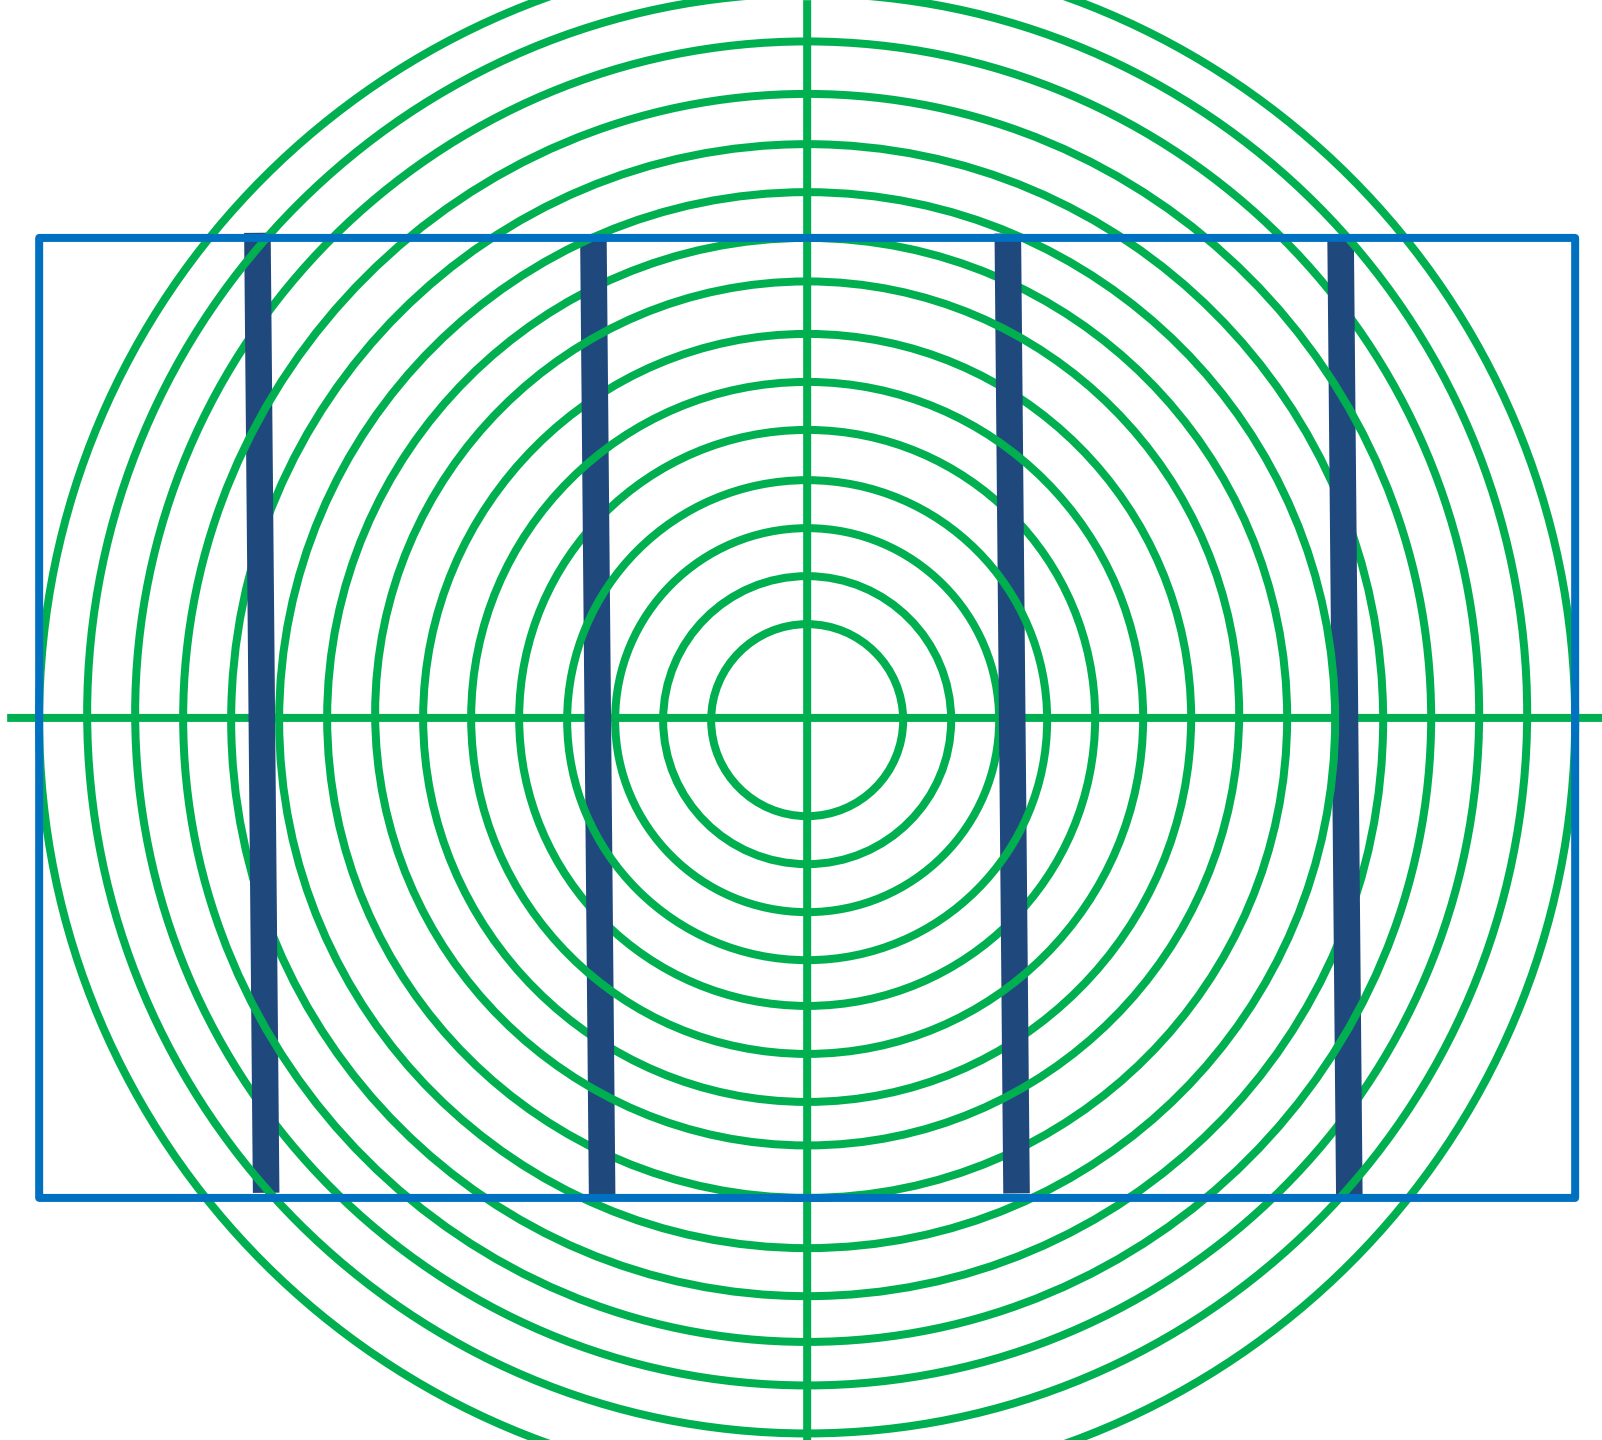

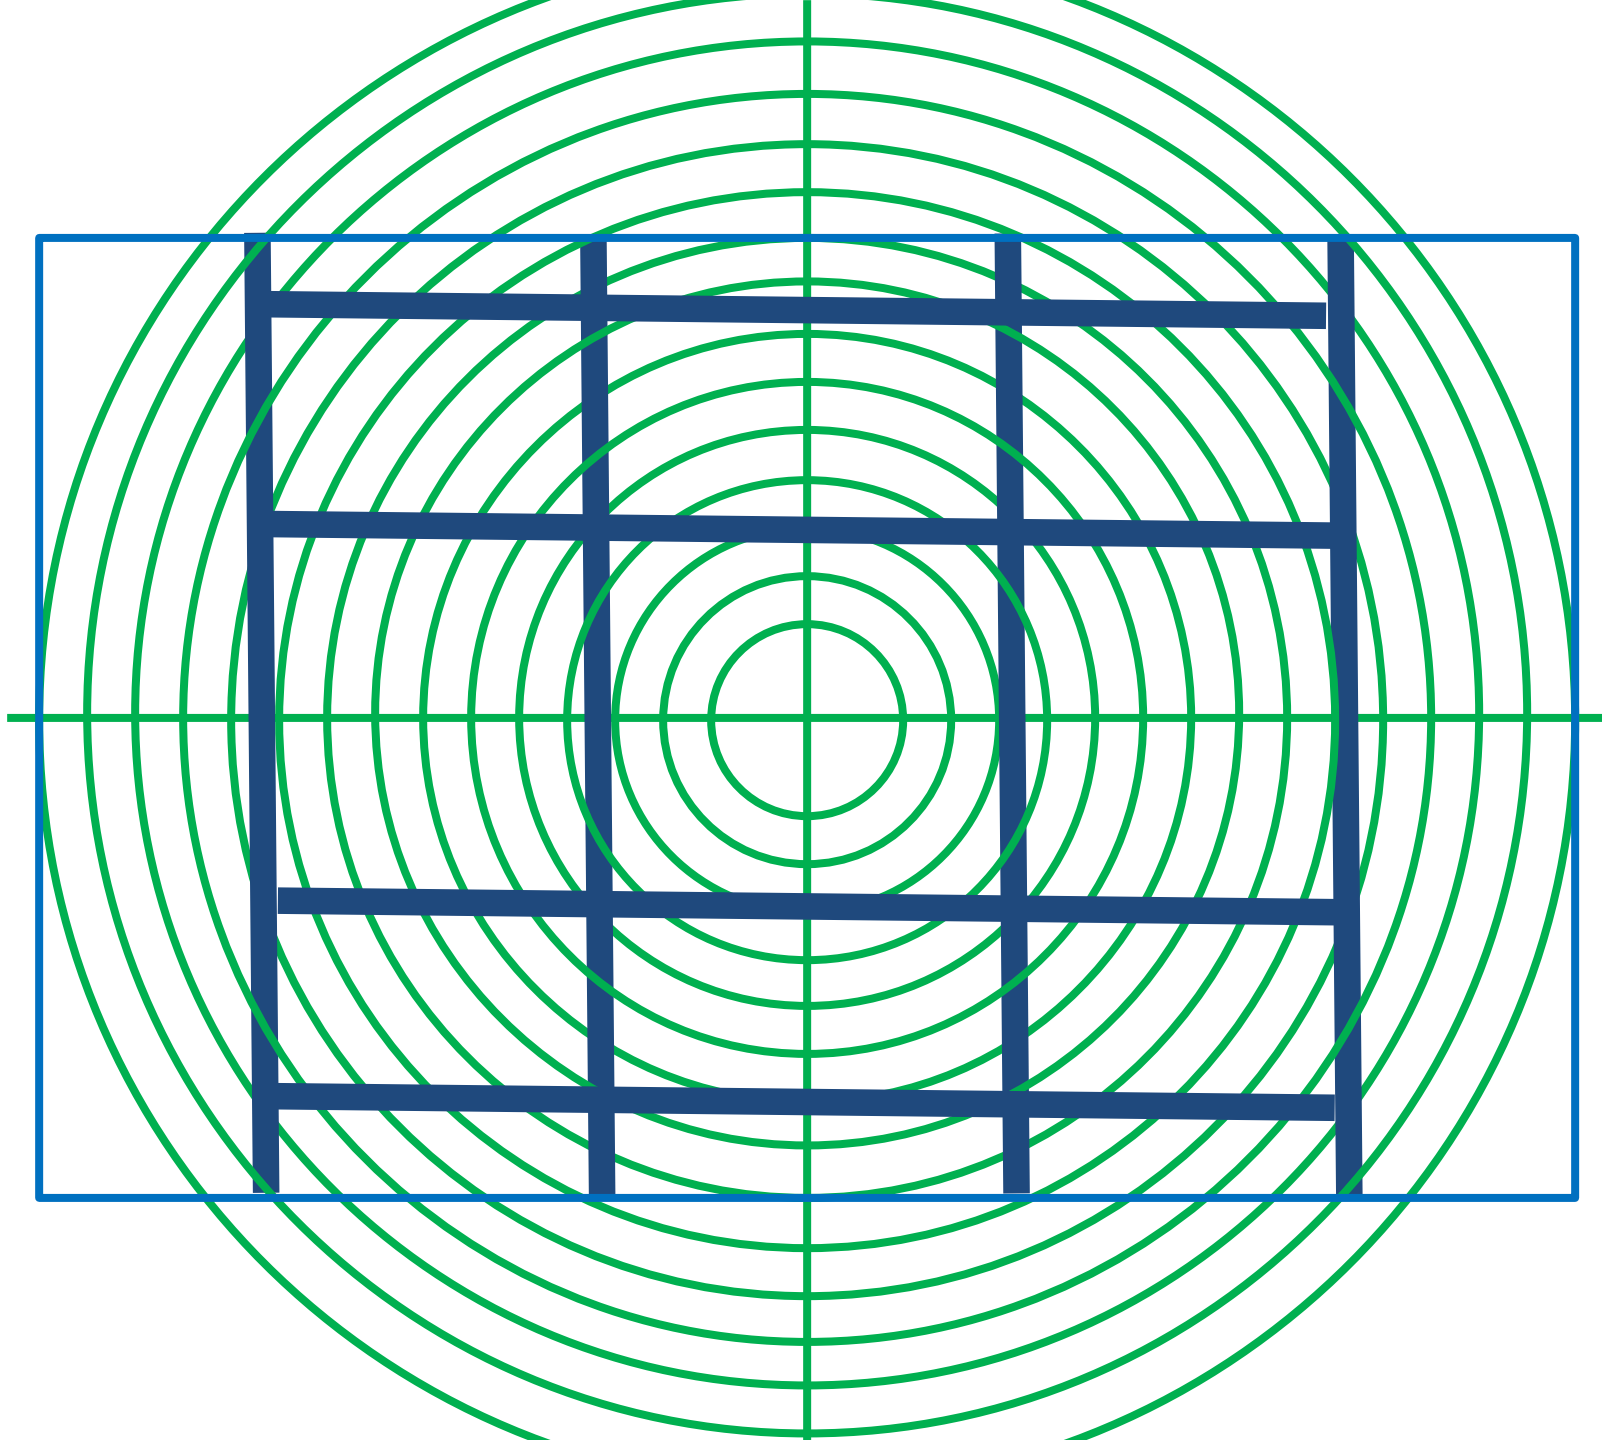



**NOTES:**

- 1. The 2 colonnades do not line up vertically.**
- 2. The lower colonnade has one more column (11) than the upper (10) .**
- 3. The columns on the lower colonnade are wider/thicker than the ones above.**
- 4. Both colonnades begin at the same point on the left, but the lower colonnade extends considerably beyond the endpoint of the upper colonnade.**

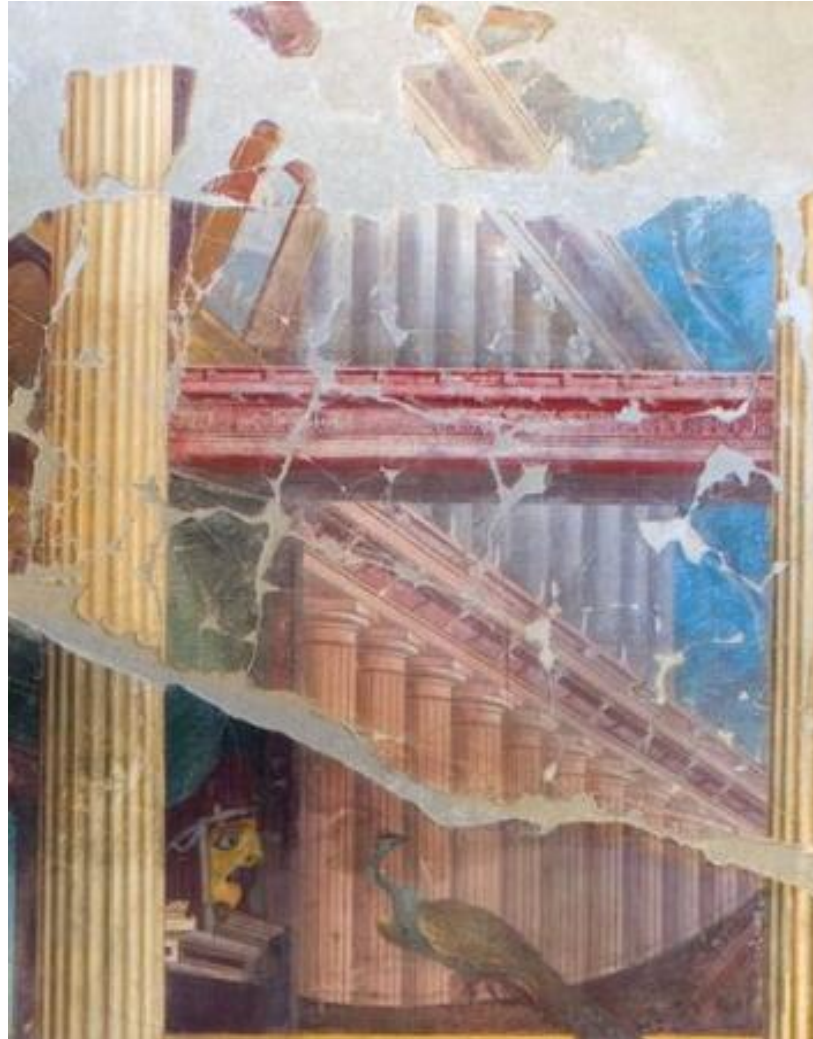

1. Removed two middle x-pieces on bottom.
2. Changed from arc to circle.
3. Added horiz x-piece.

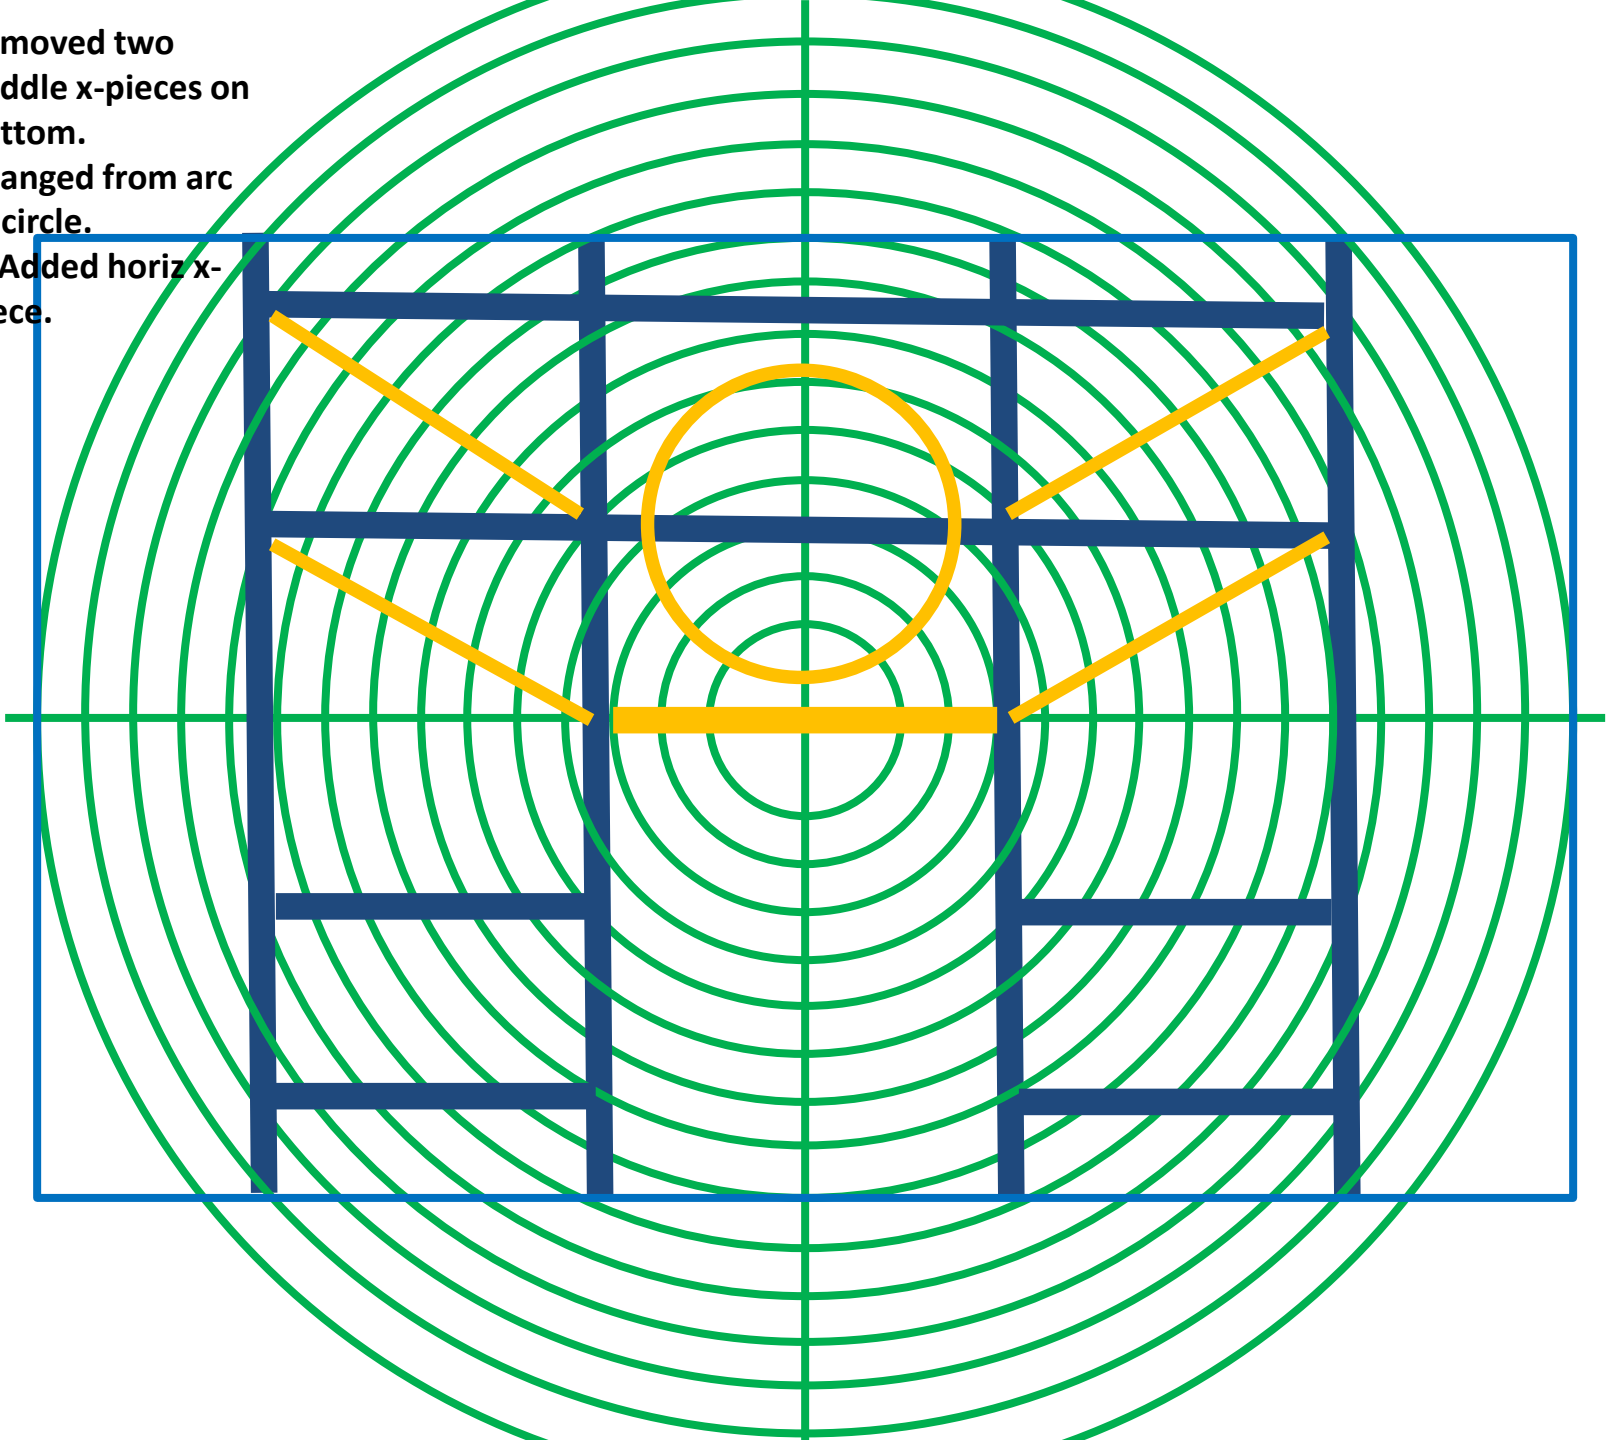

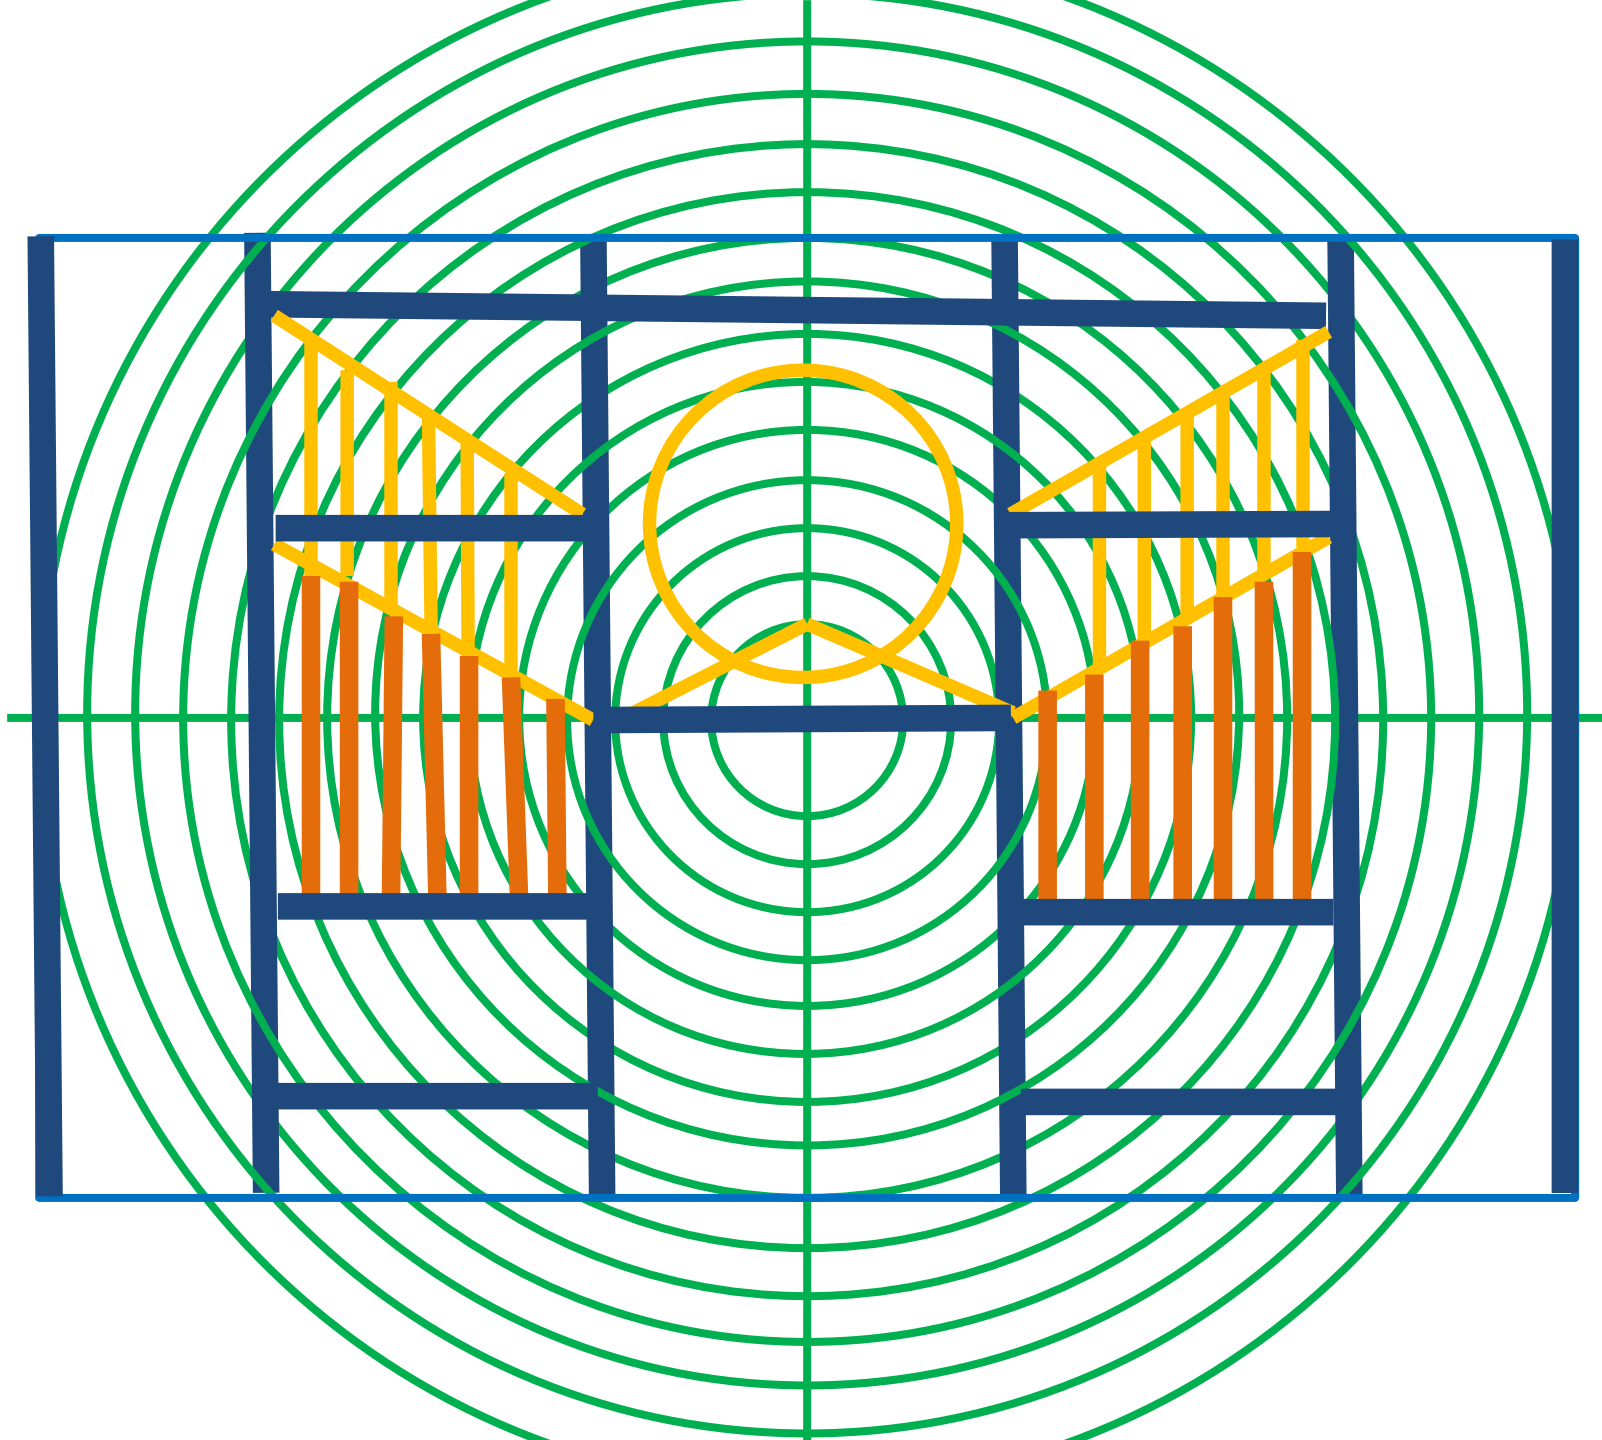

Because the colonnades slant downward, that taper is reflected in the upper columns at first being 2 circles inward from their start. I.e., the purple column ends at the bottom on the blue circle, but by the yellow column the separation is only one circle.

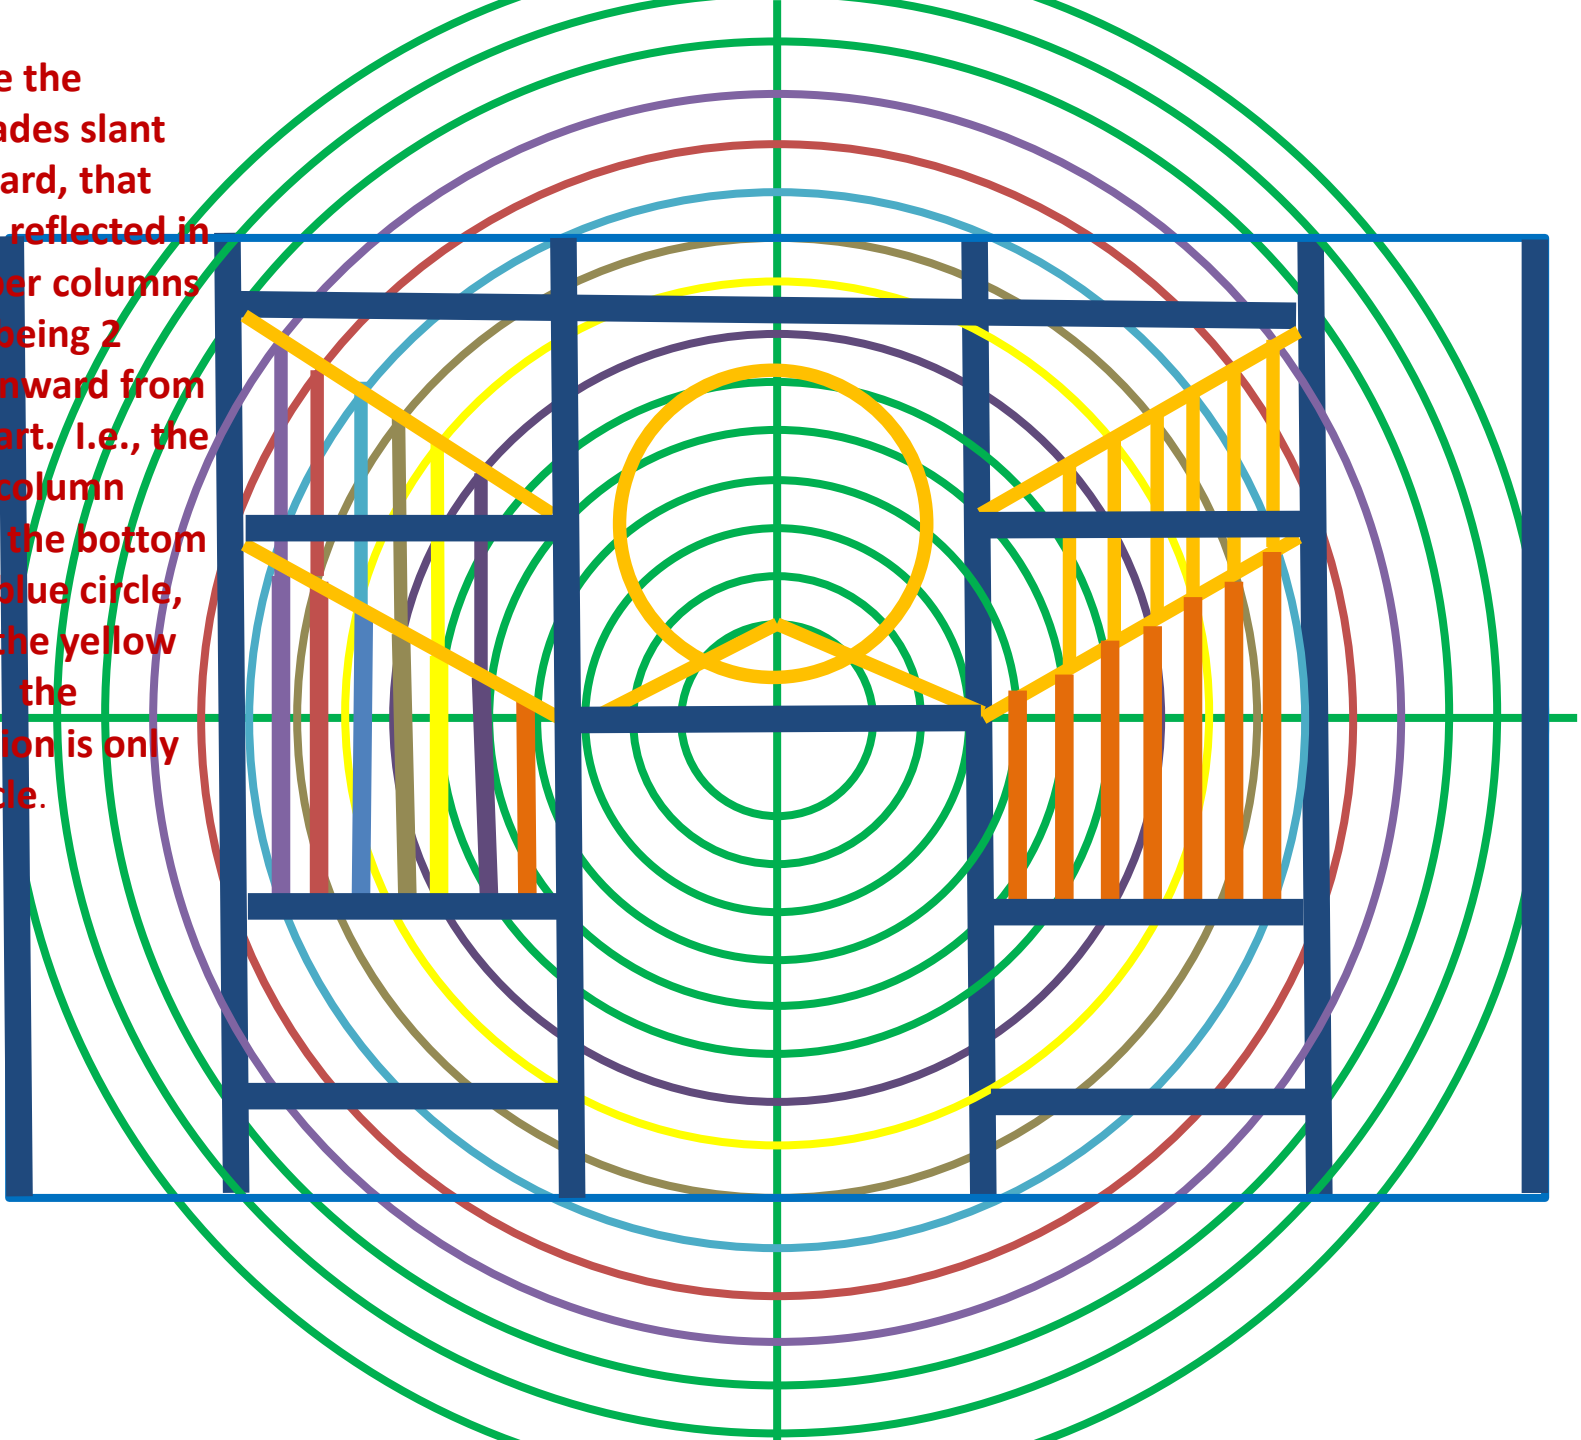

1. Innermost black circle abuts the blue horizontal crosspieces AND sets the width/point at which the vertical sides of the arch drop.
2. The two outer black circles determine where the verticals slant down to the blue verticals.

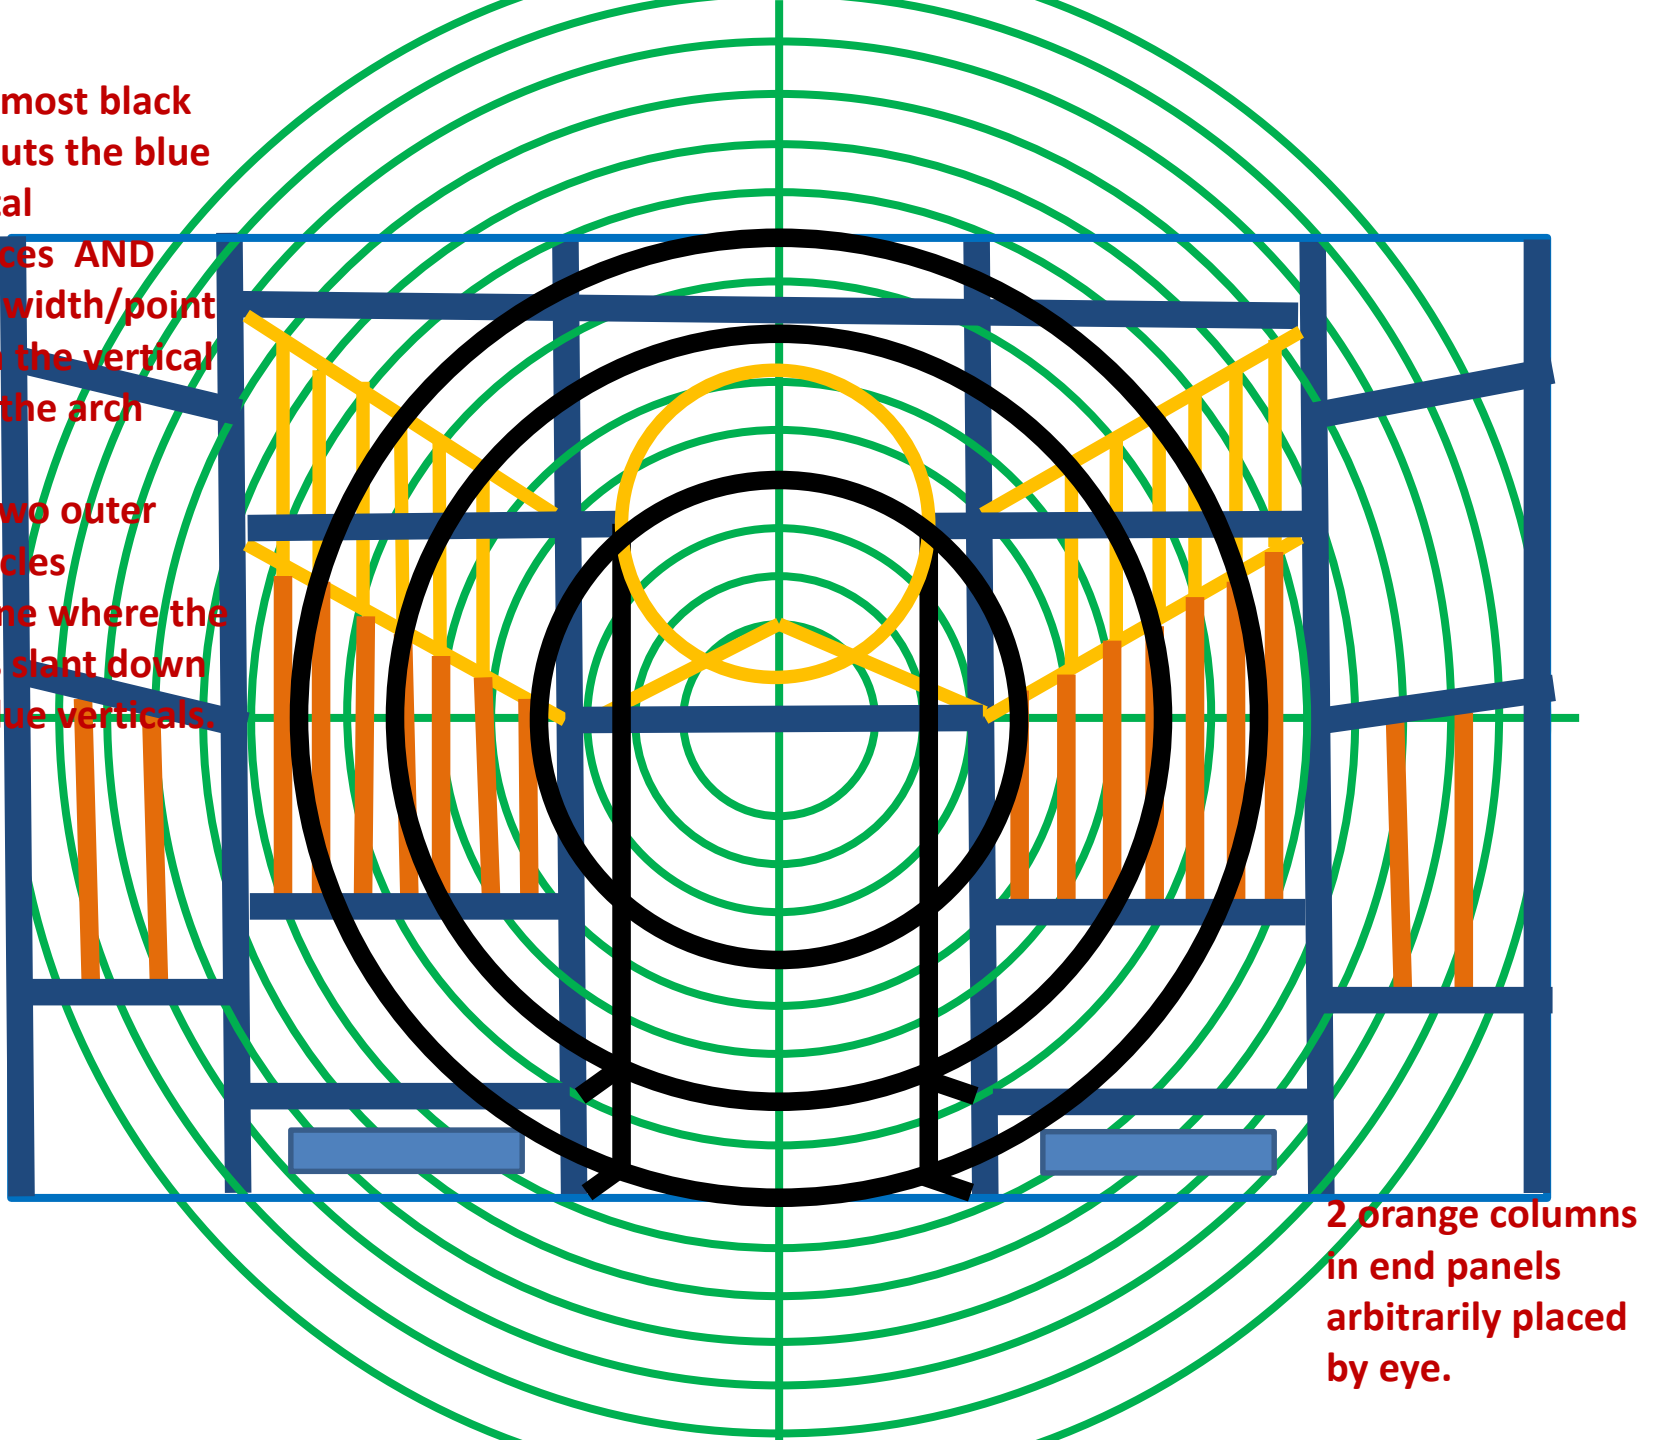

2 orange columns  
in end panels  
arbitrarily placed  
by eye.

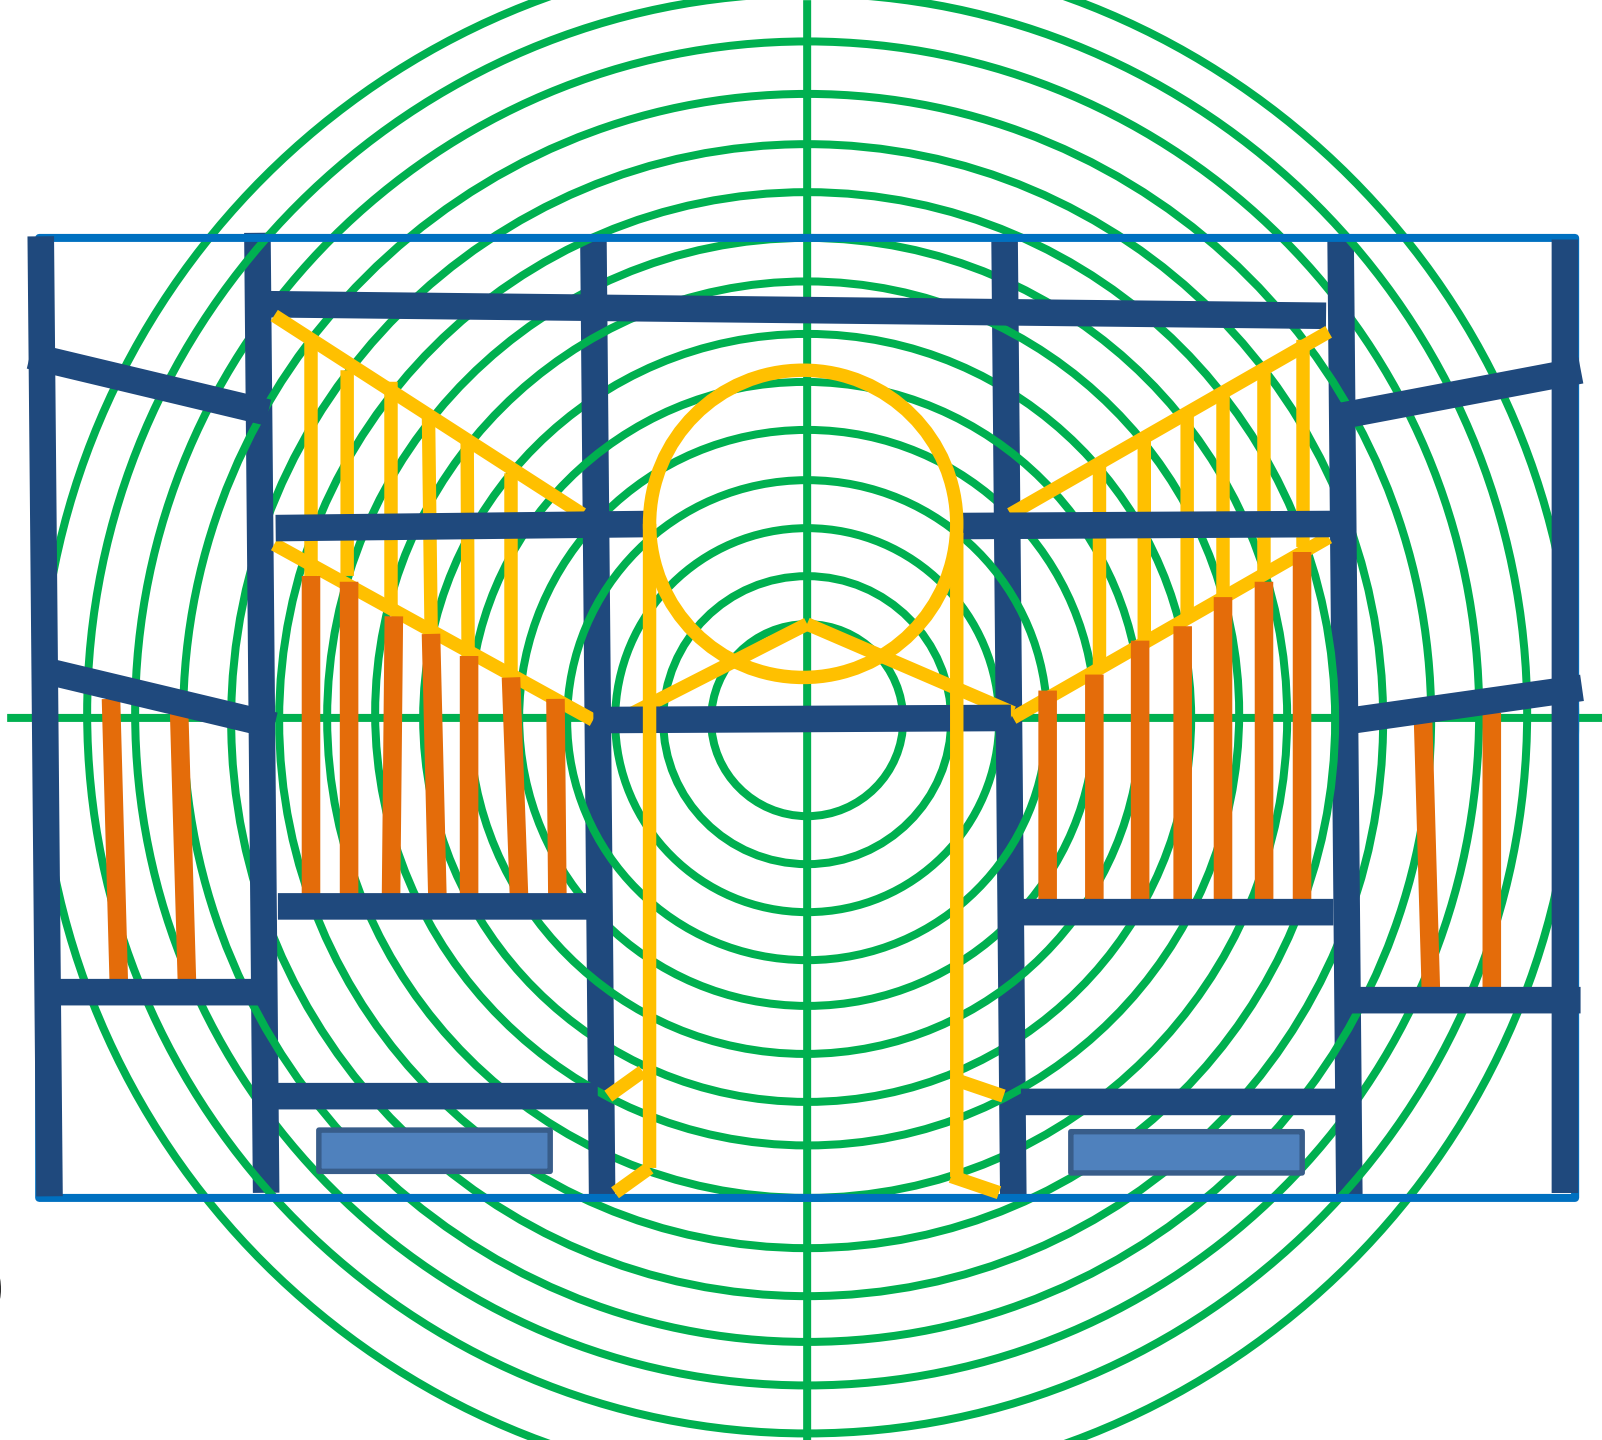



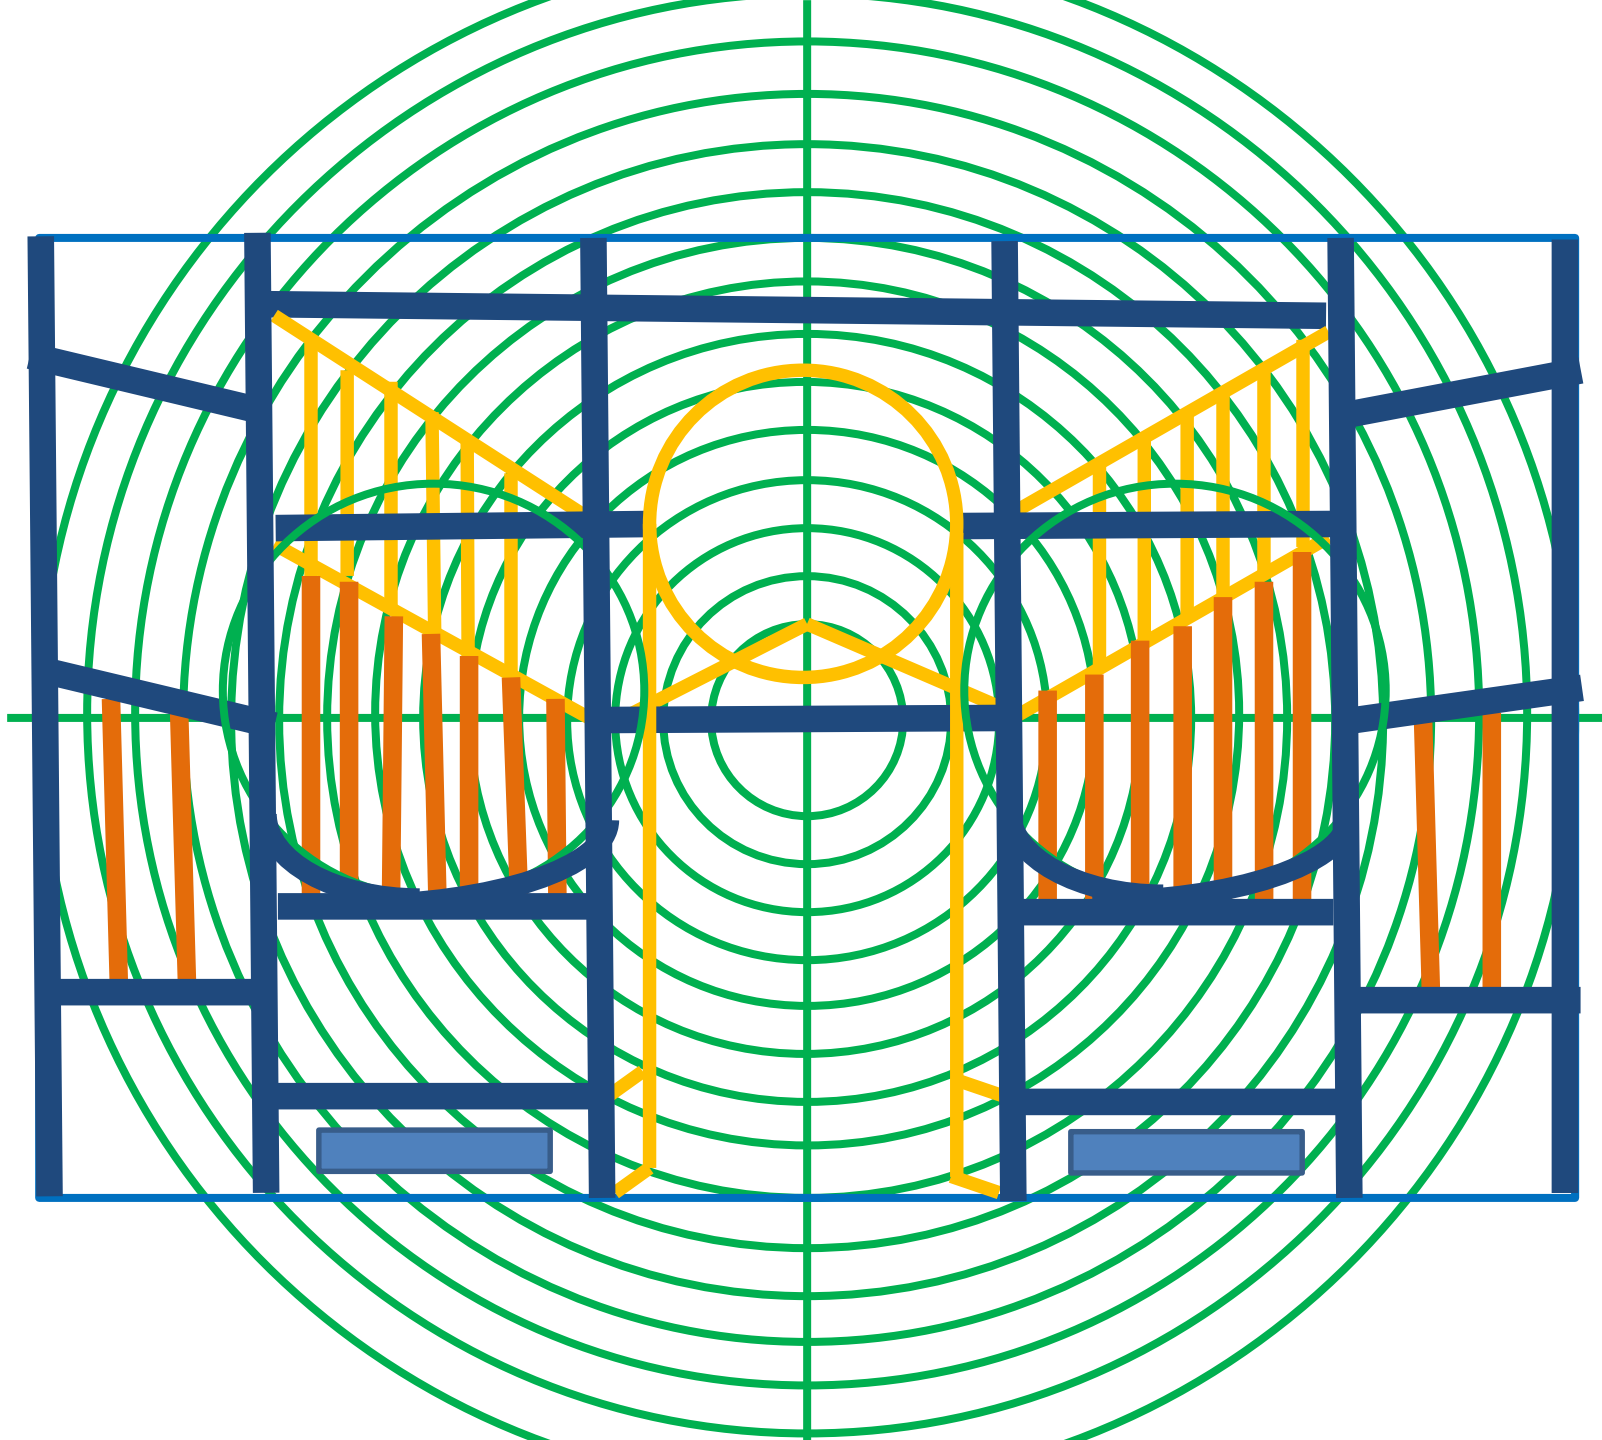

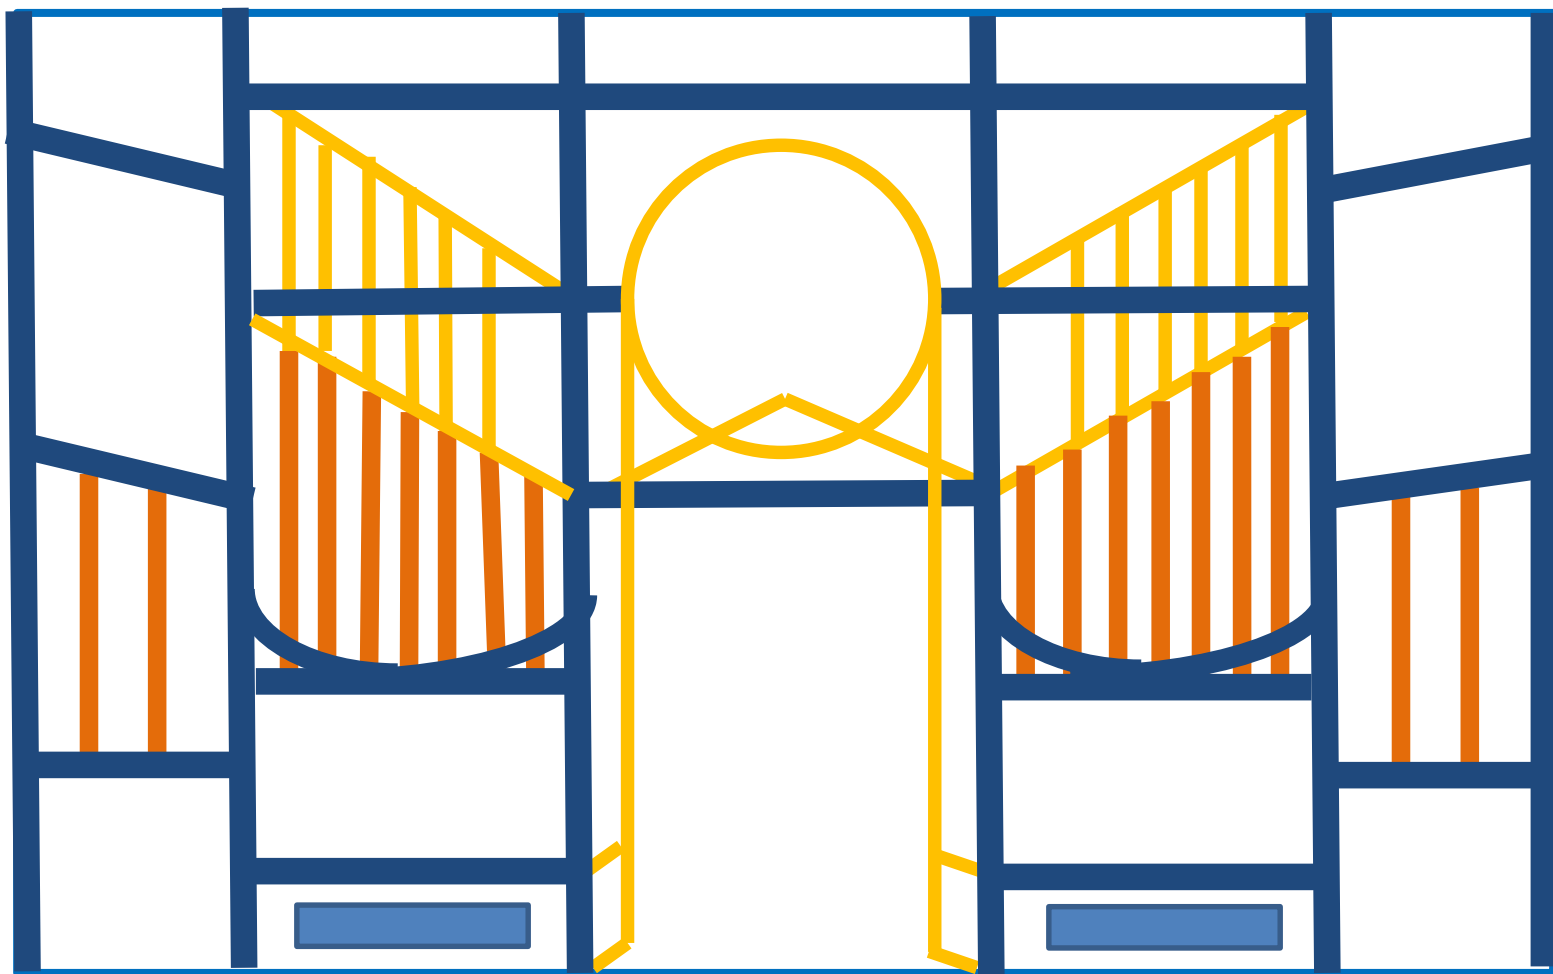

# **Second Style**

## **2. House of the Cryptoporticus**

Frigidarium

Pompeii I.6.2-4

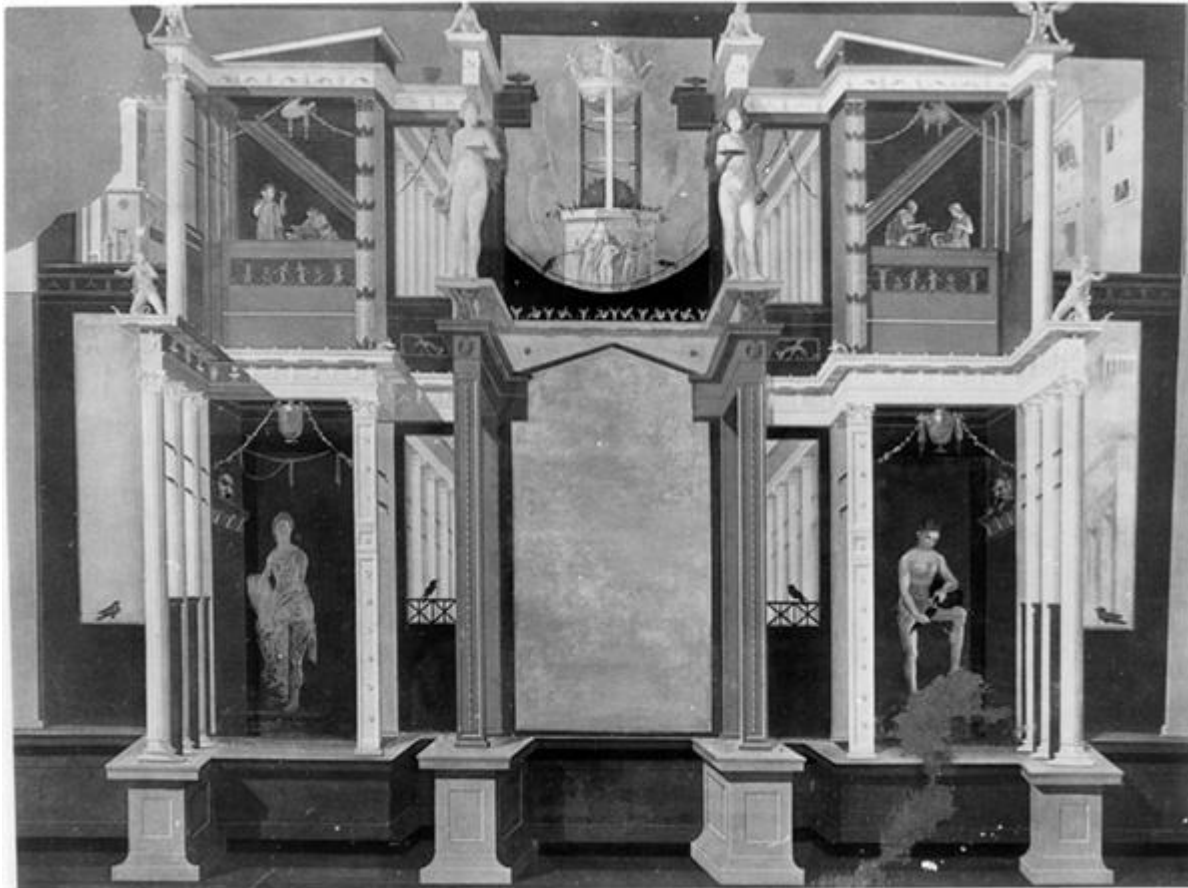

[http://www.kvl.cch.kcl.ac.uk/wall\\_paintings/crypto/artist/default.htm](http://www.kvl.cch.kcl.ac.uk/wall_paintings/crypto/artist/default.htm)

= to conversion of the Schefold (Klinkert) painting to grayscale. Am using this one because the colors are off in the color version.

For photographs:

<http://www.pompeiiinpictures.com/pompeiiinpictures/r1/1%2006%2002%20p6.htm>

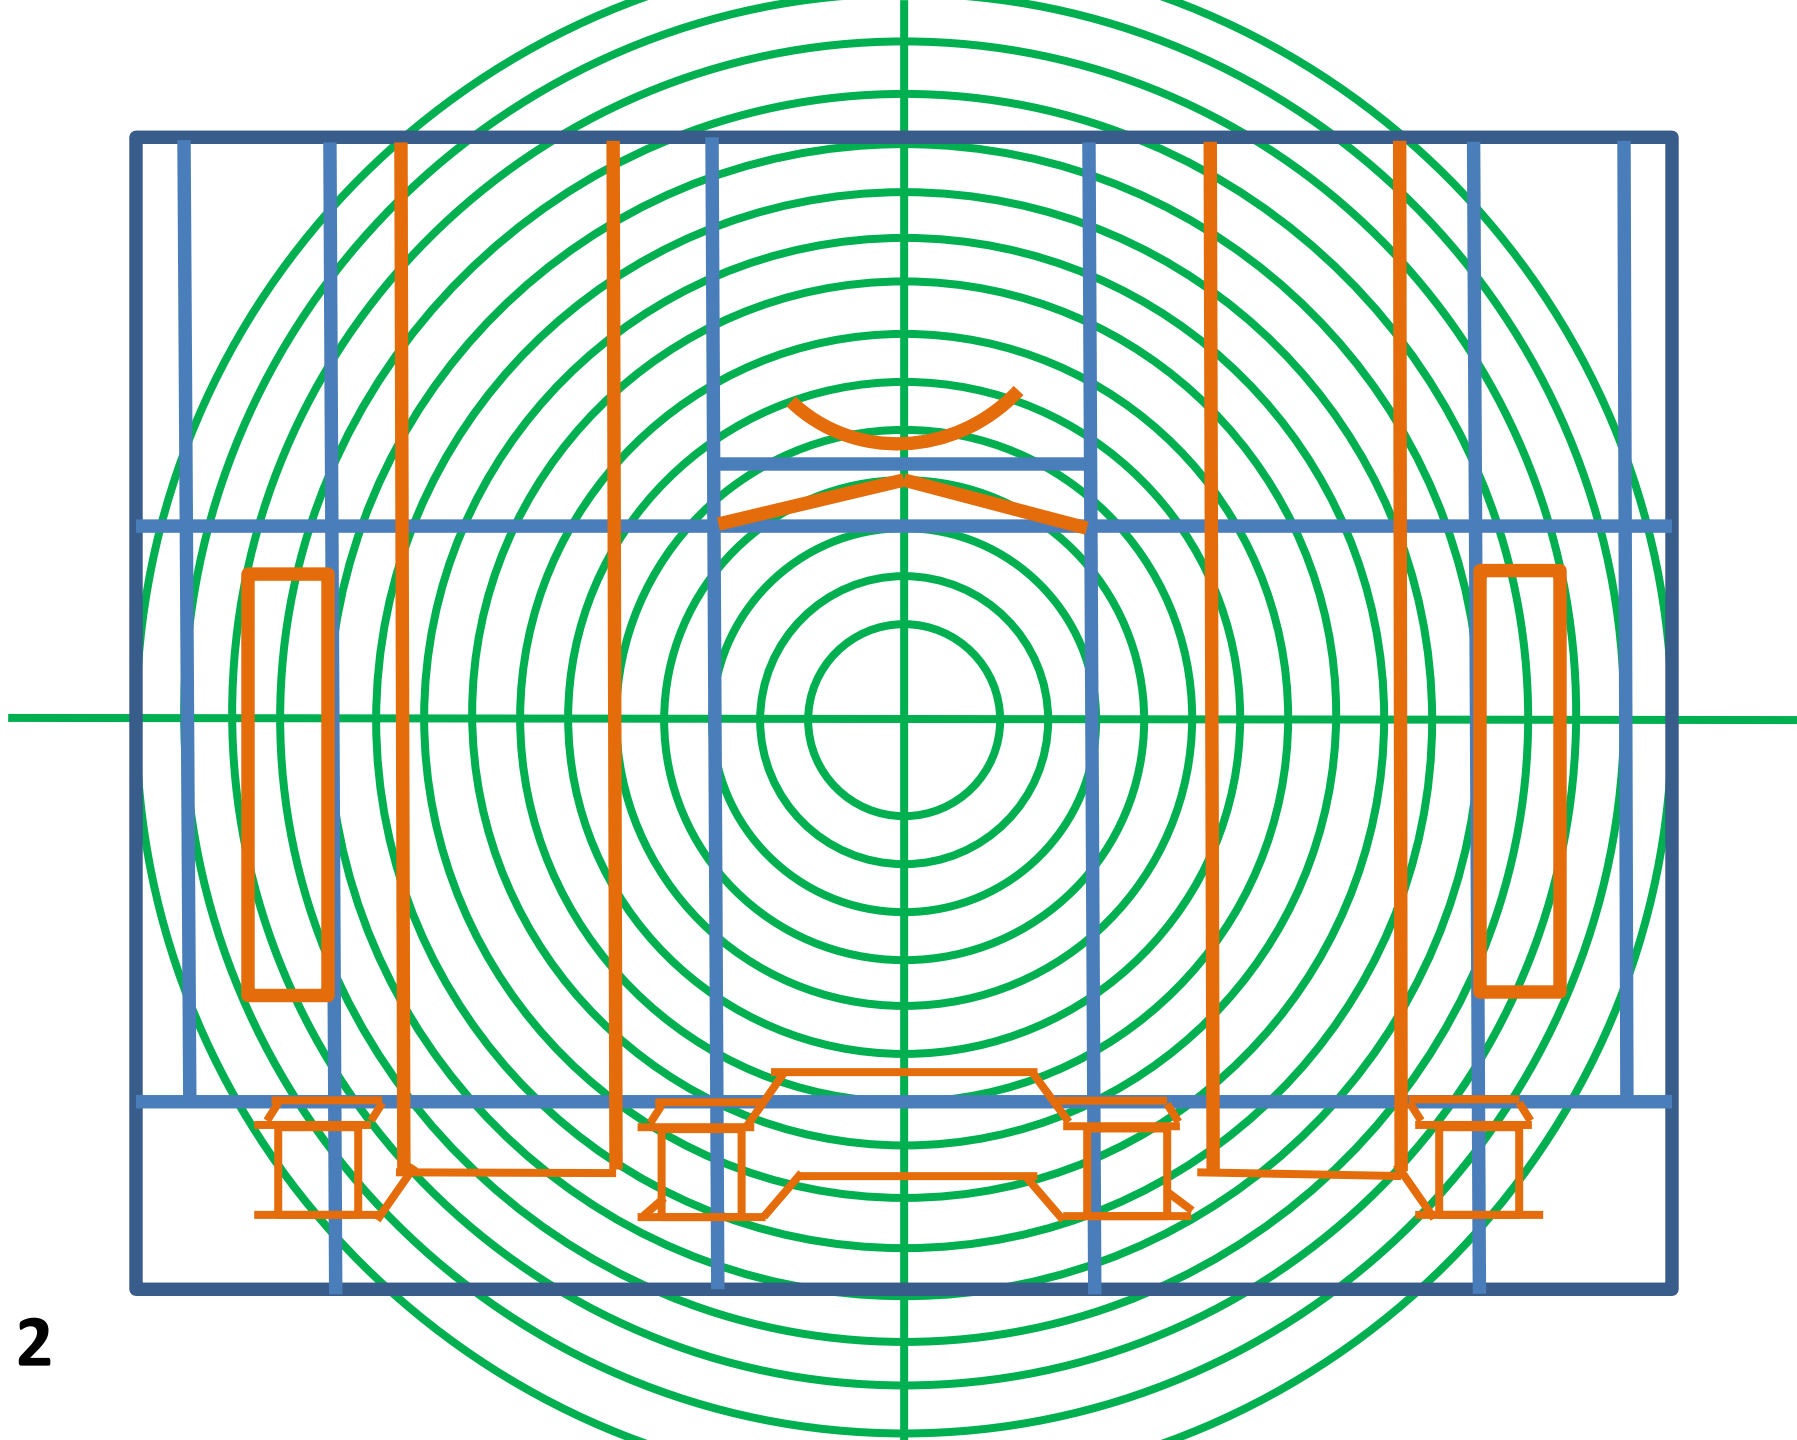

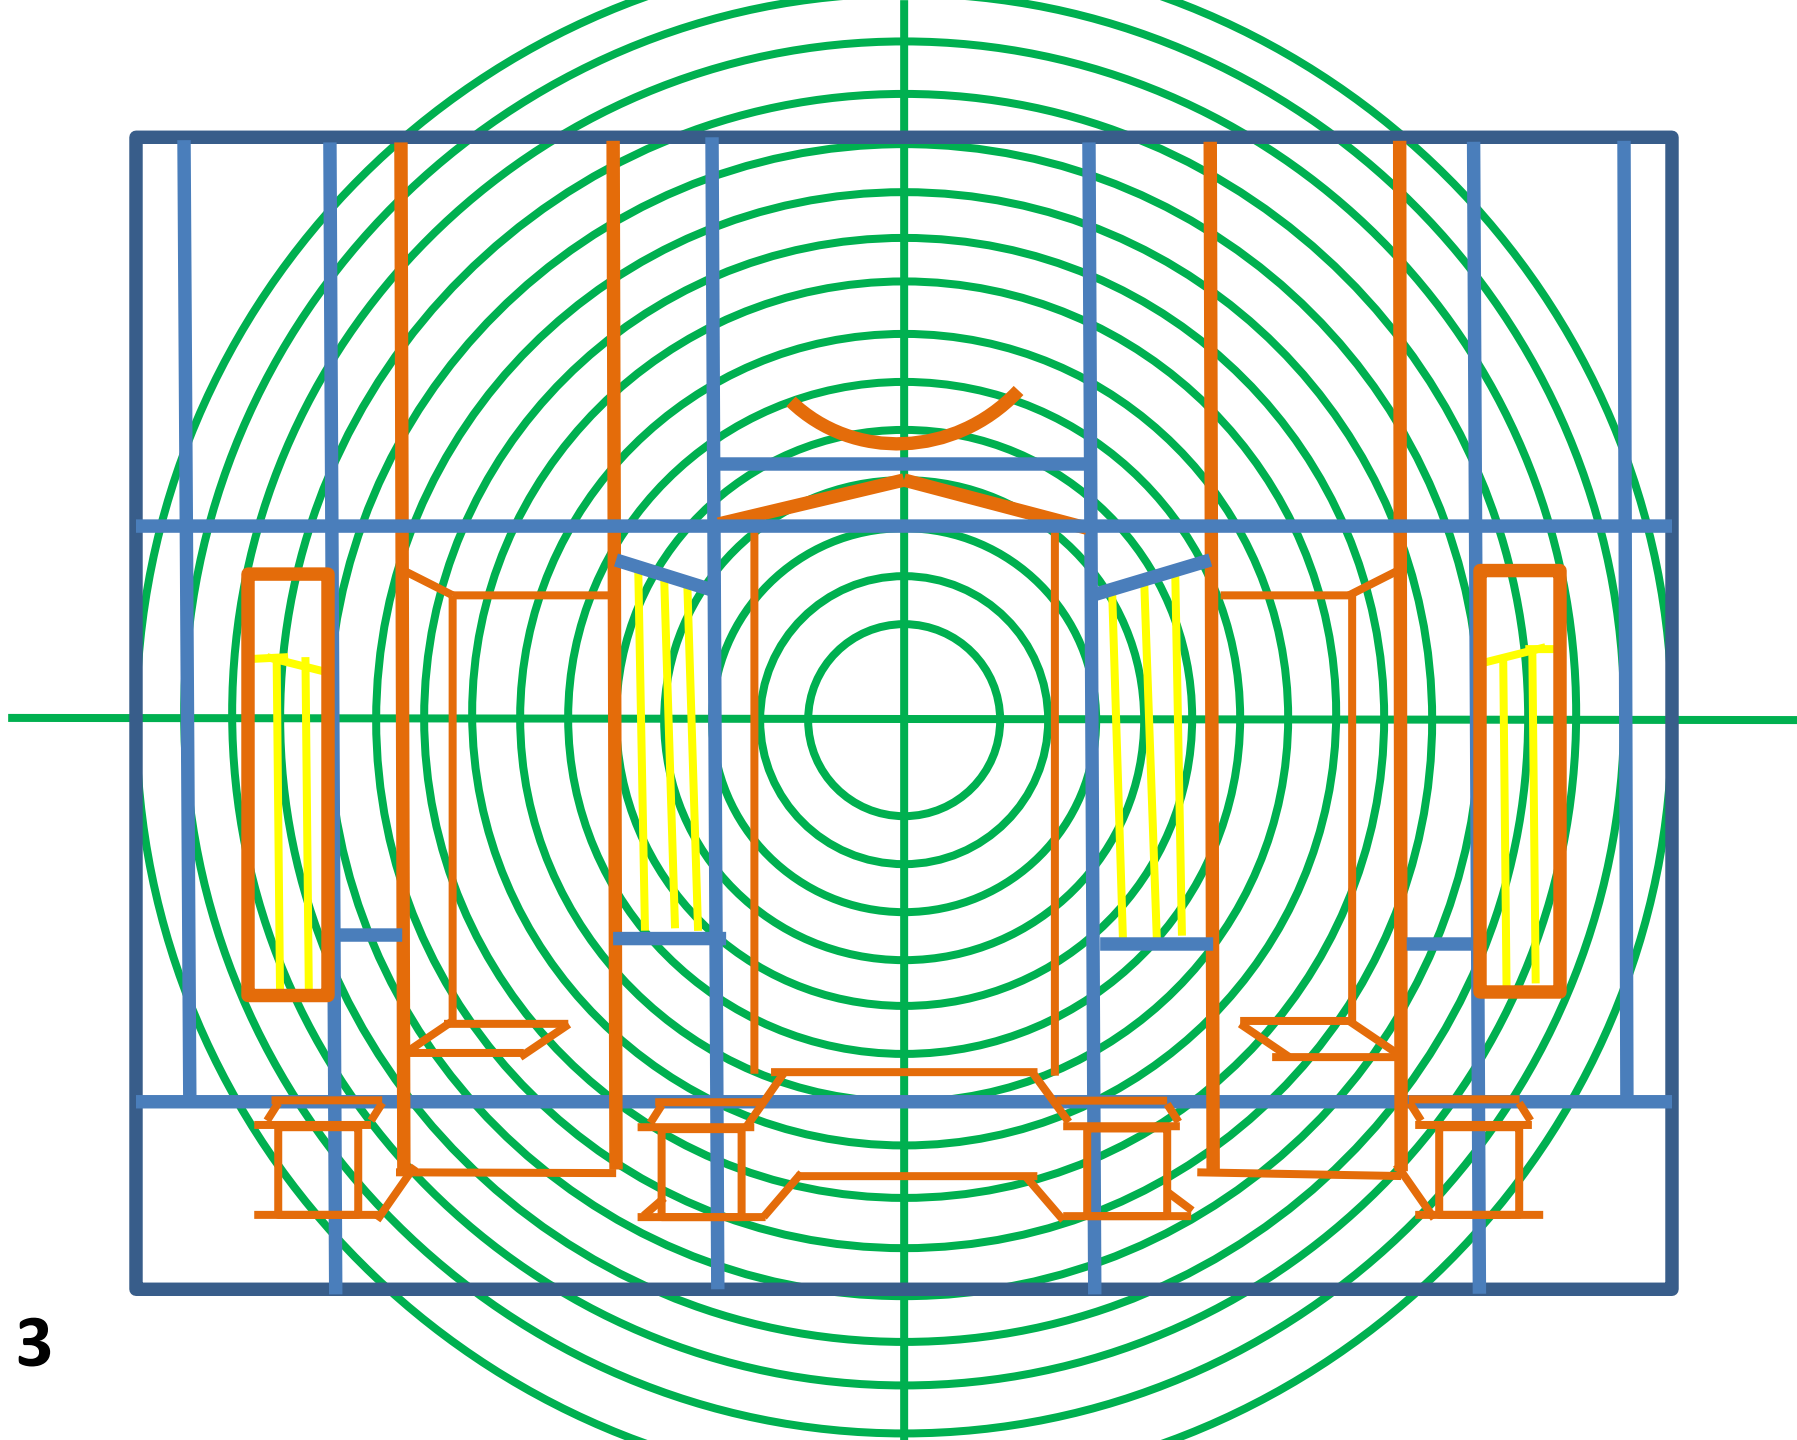



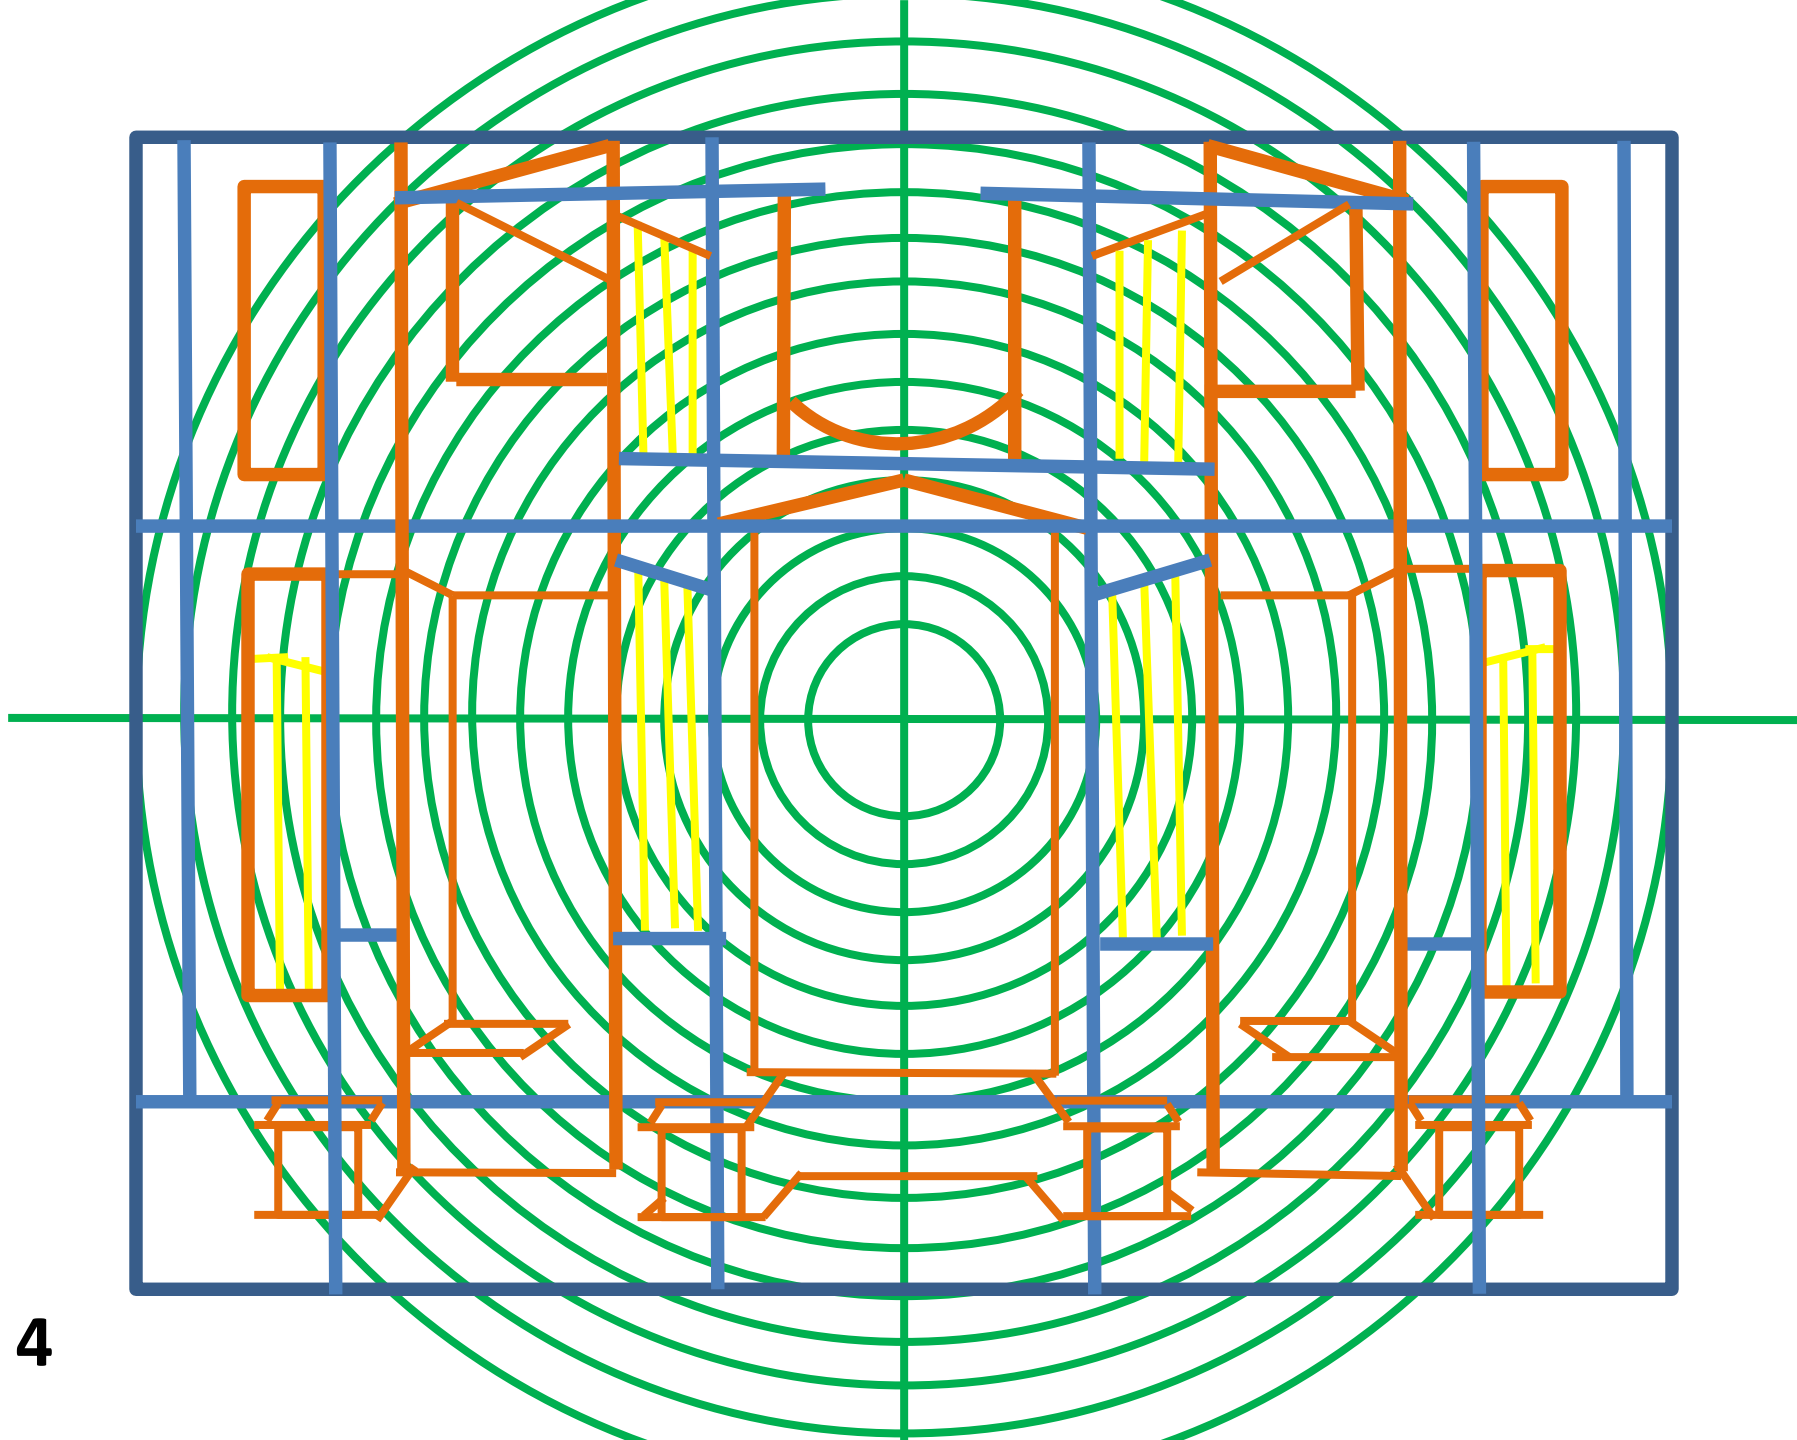

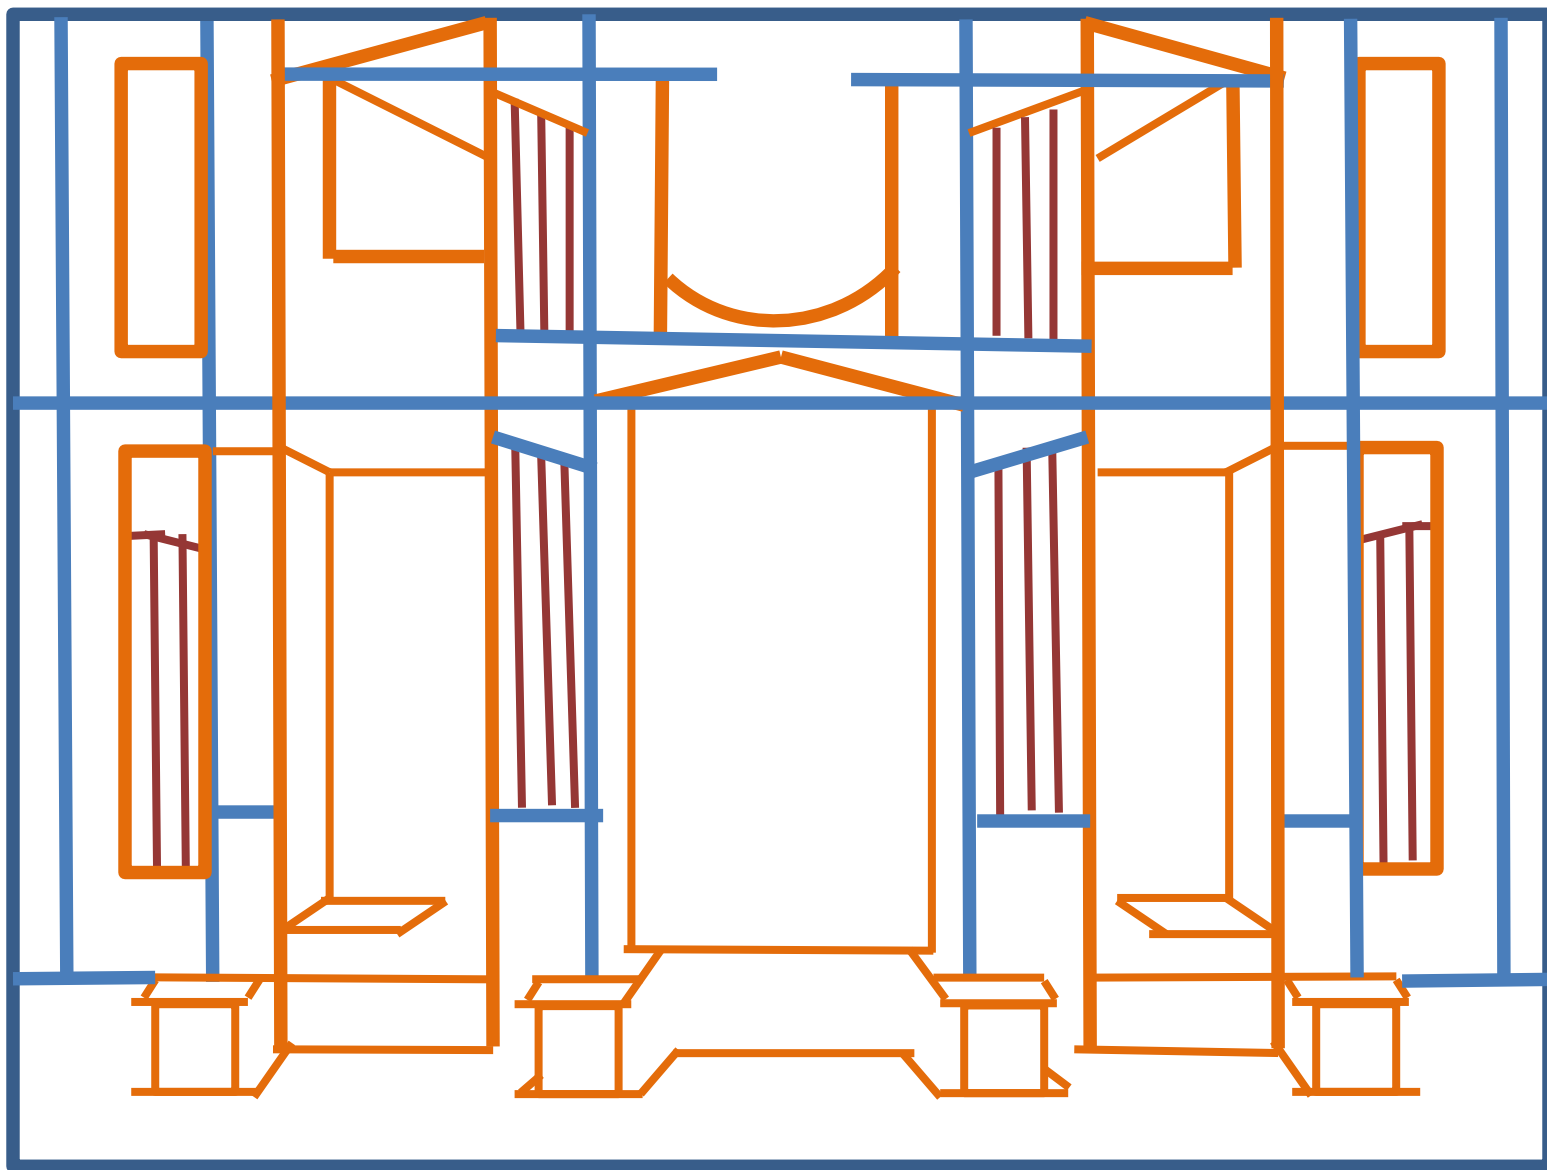

**Third Style**

**3. House of Marcus Lucretius**

**Fronto**

Tablinum

Pompeii V.4.a

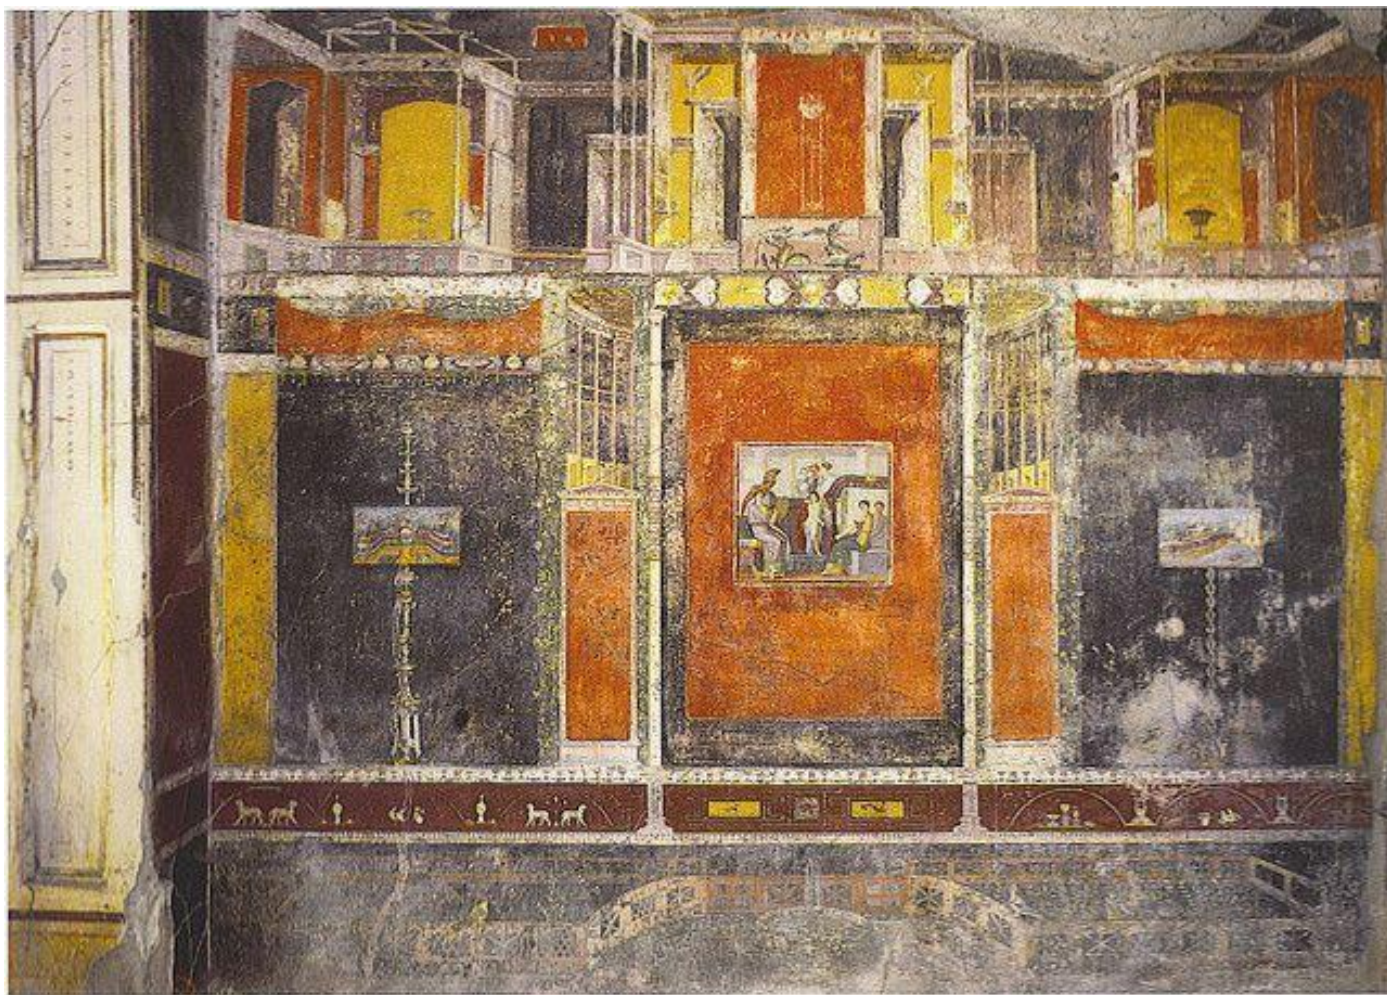

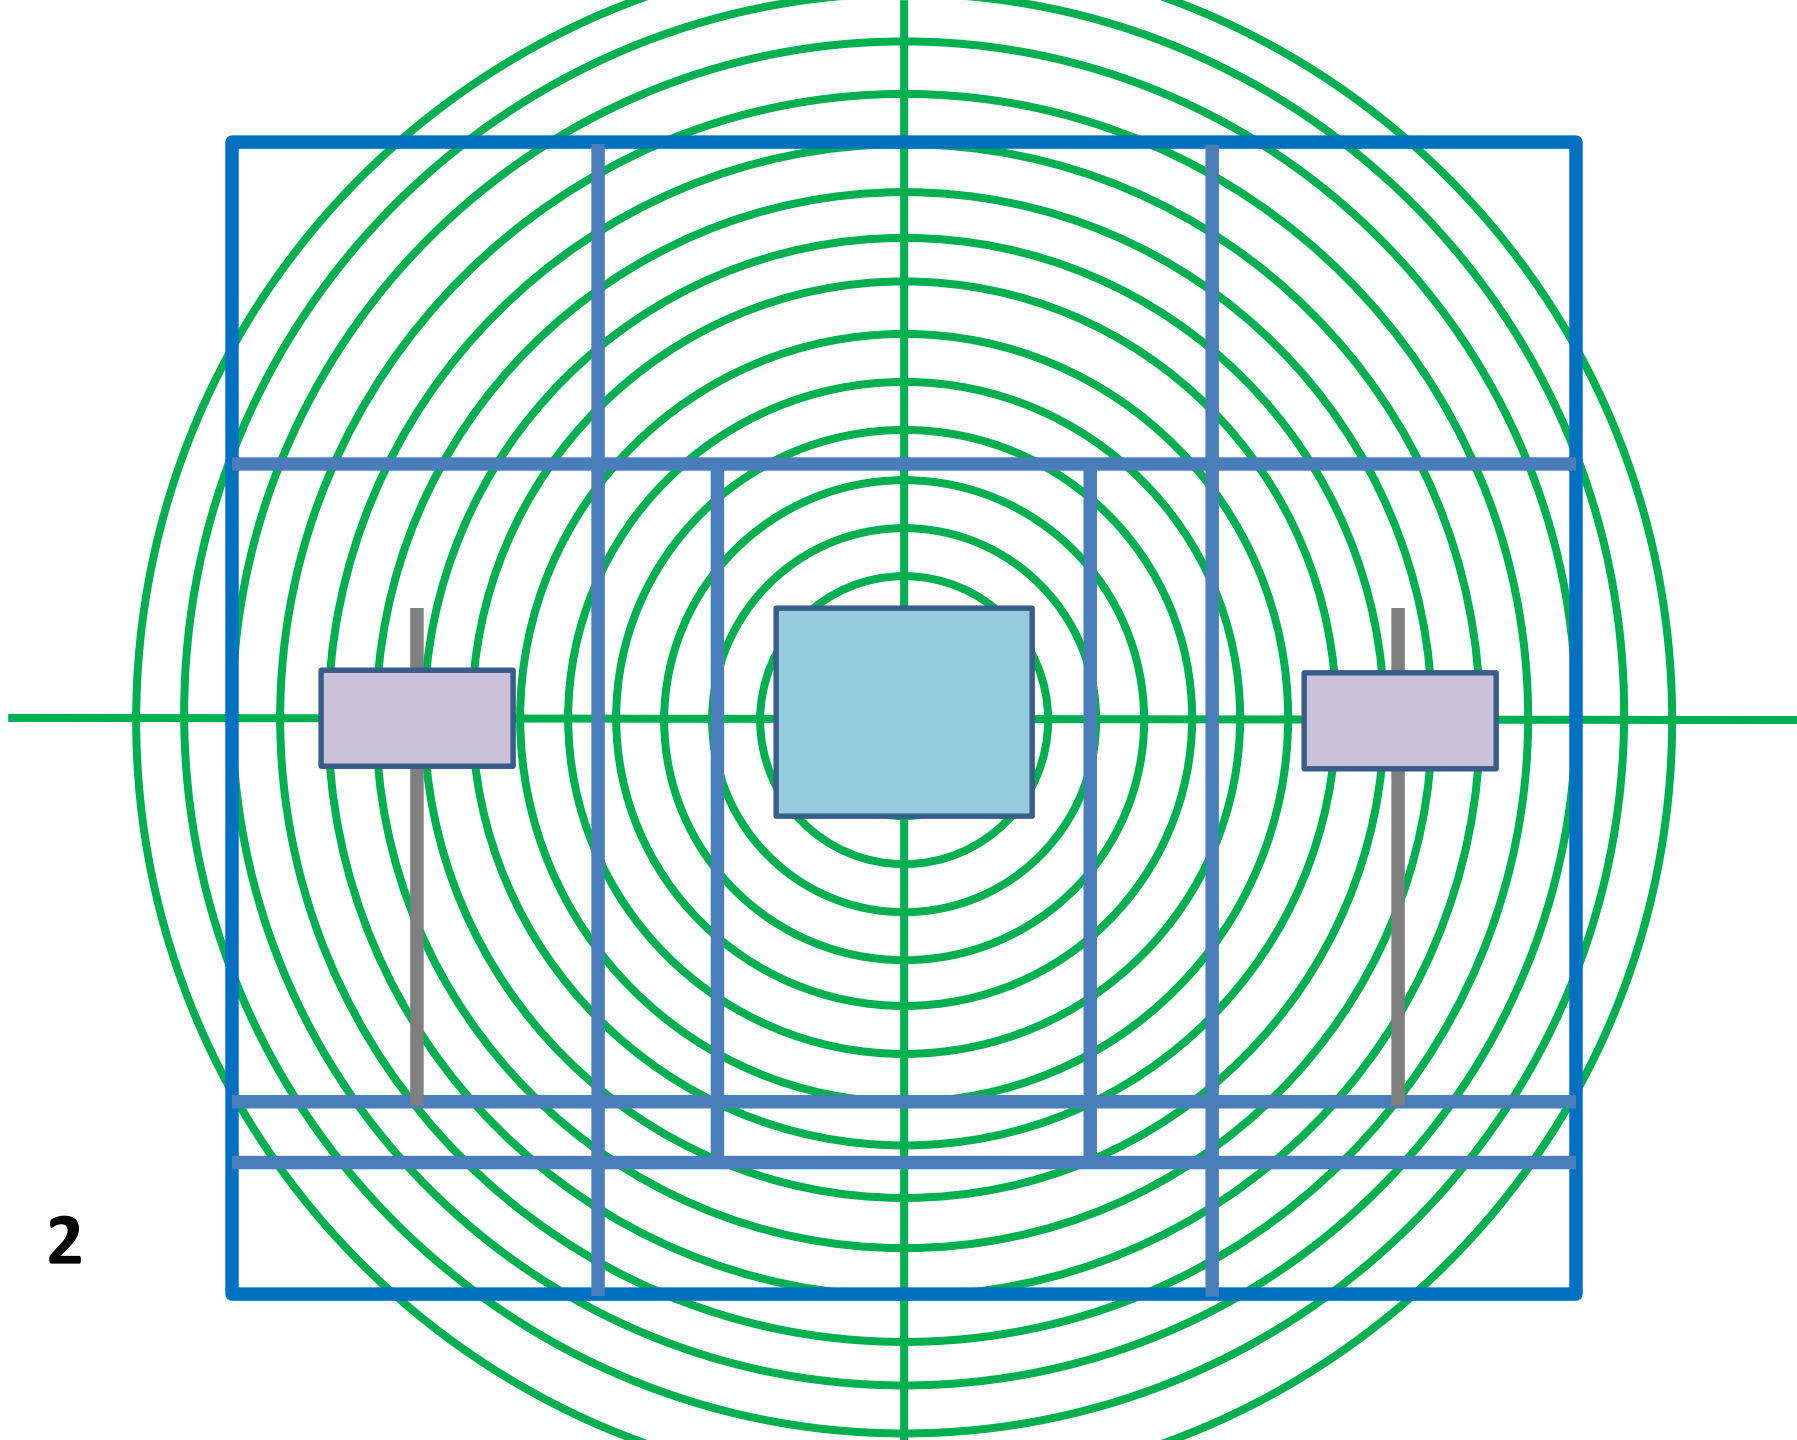

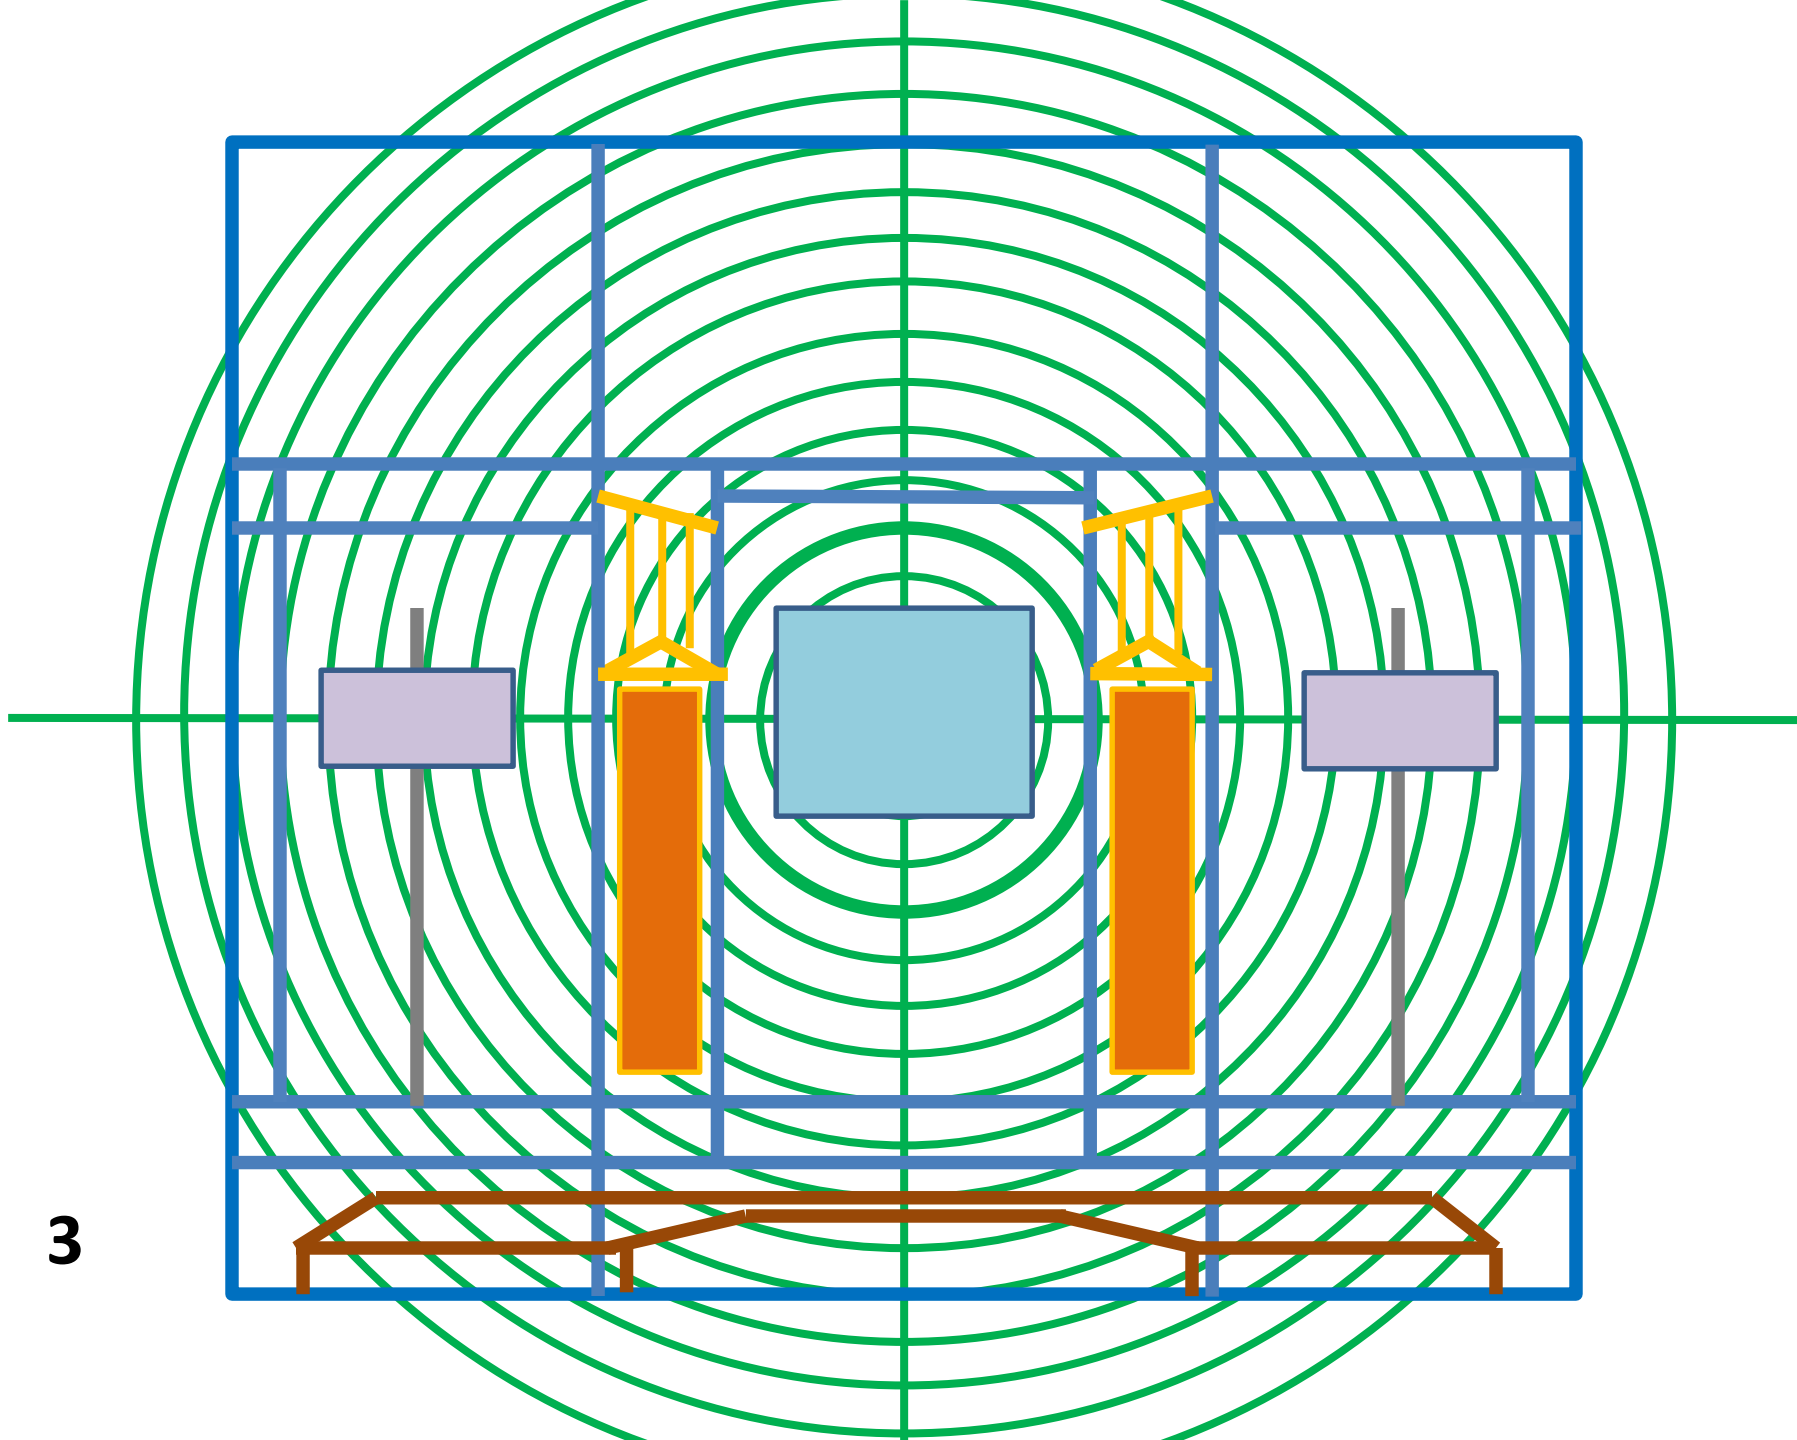

3



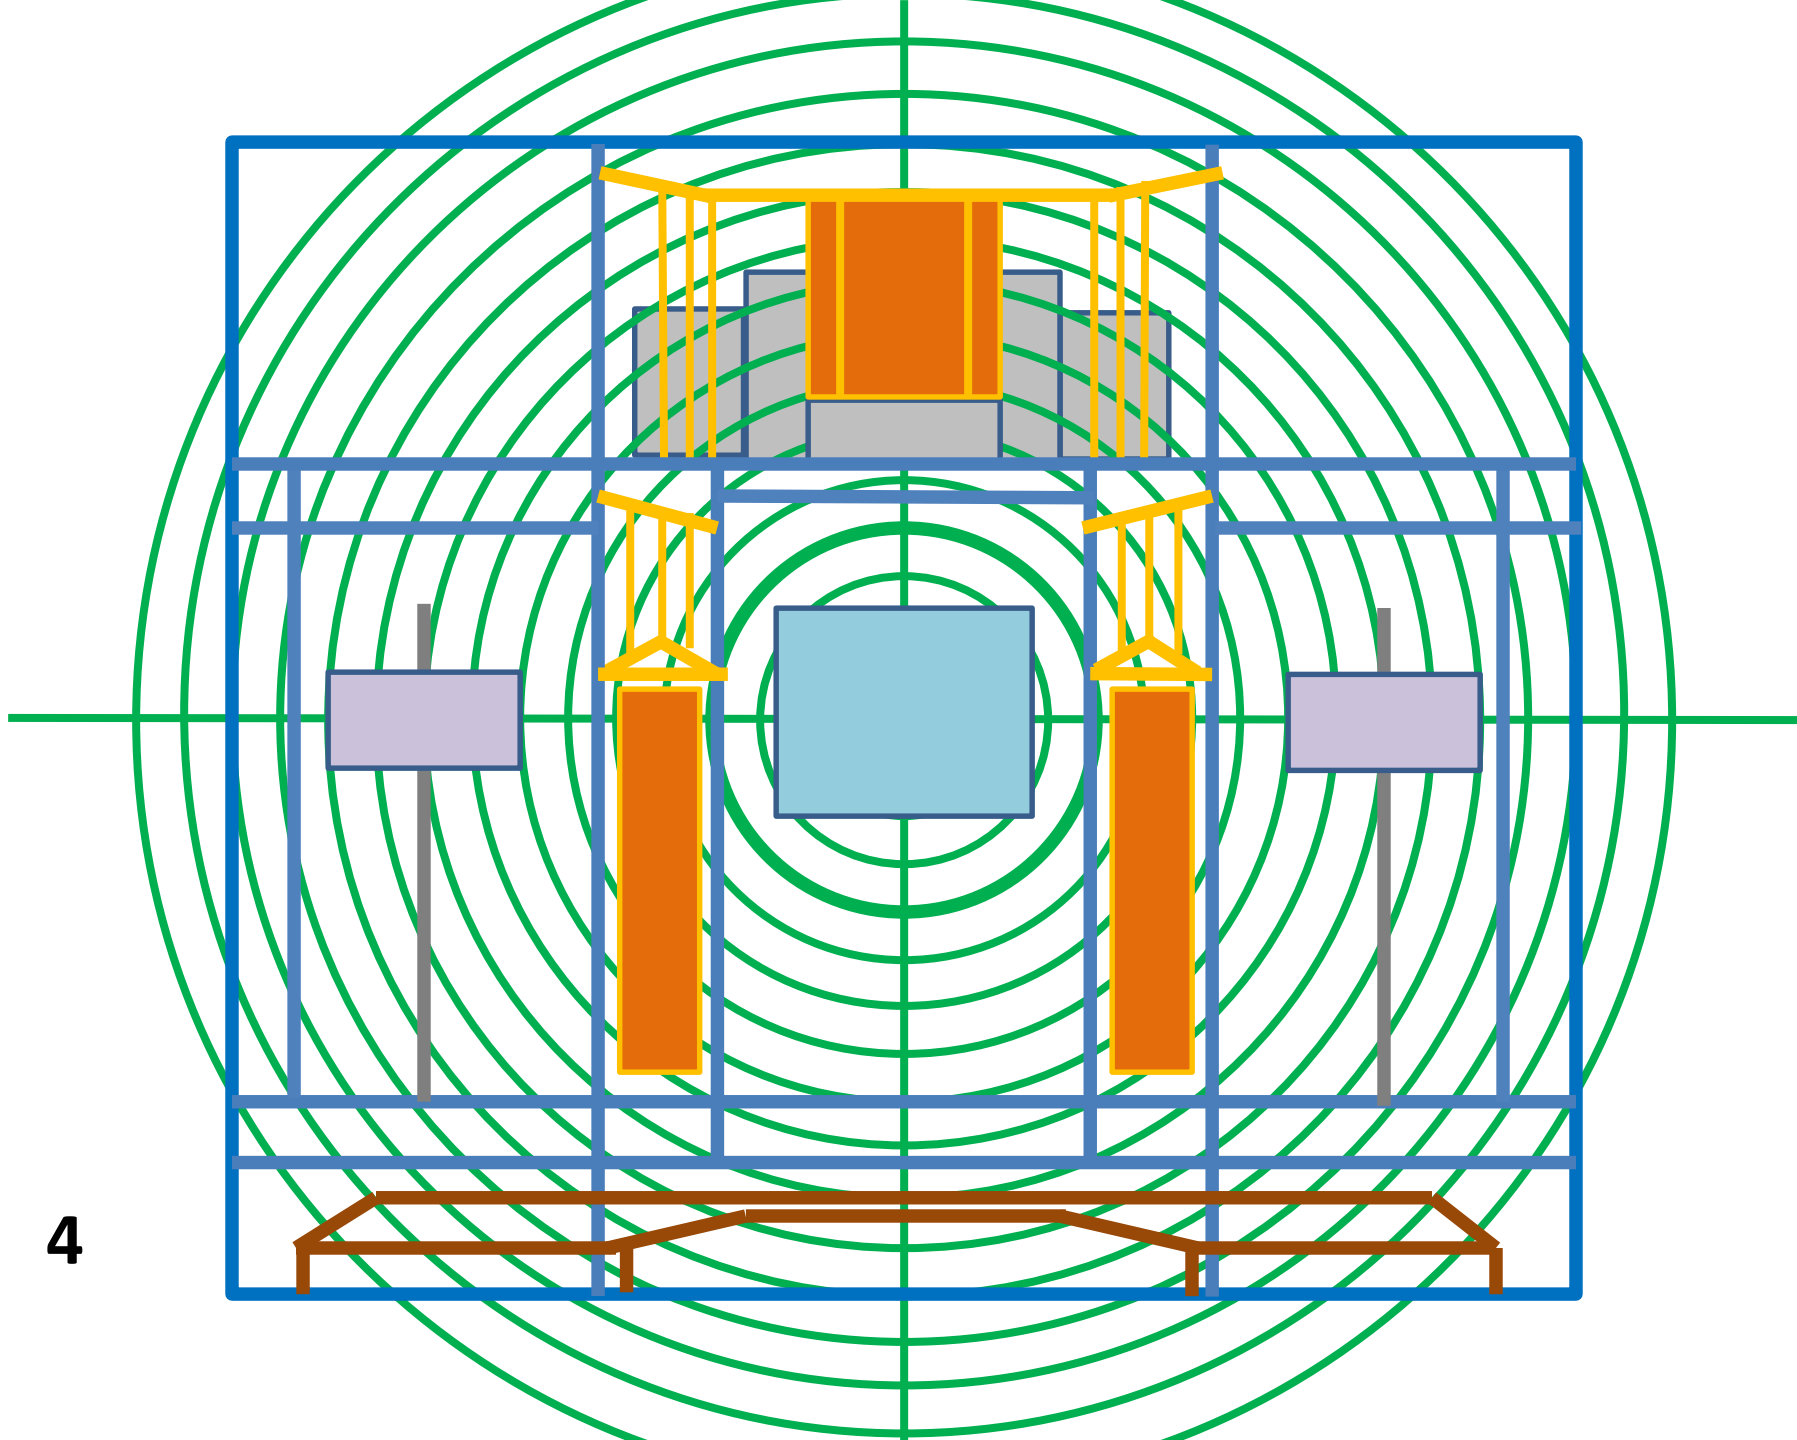

4

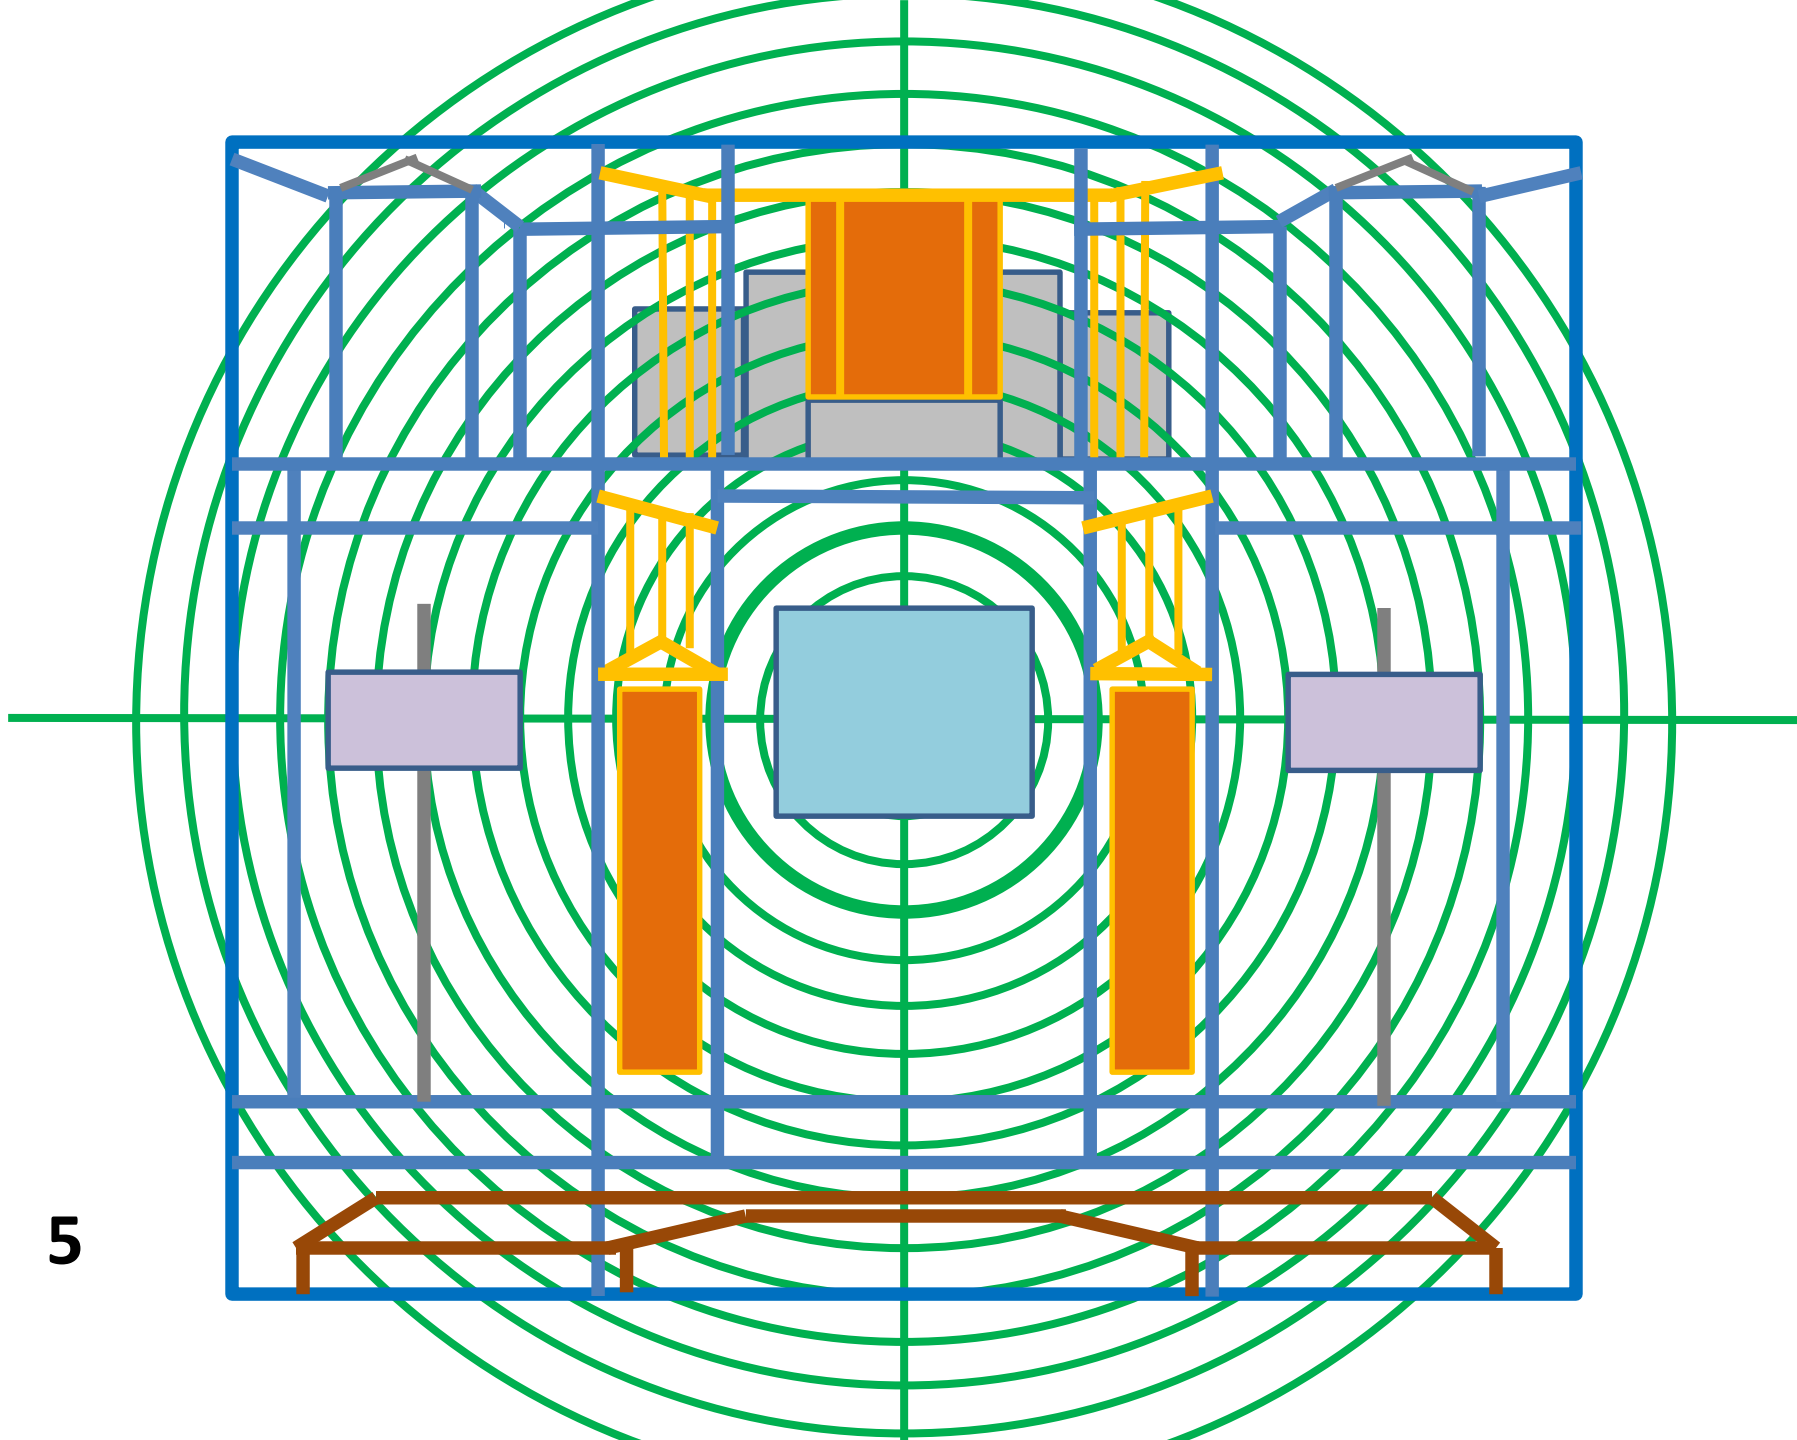

5

6

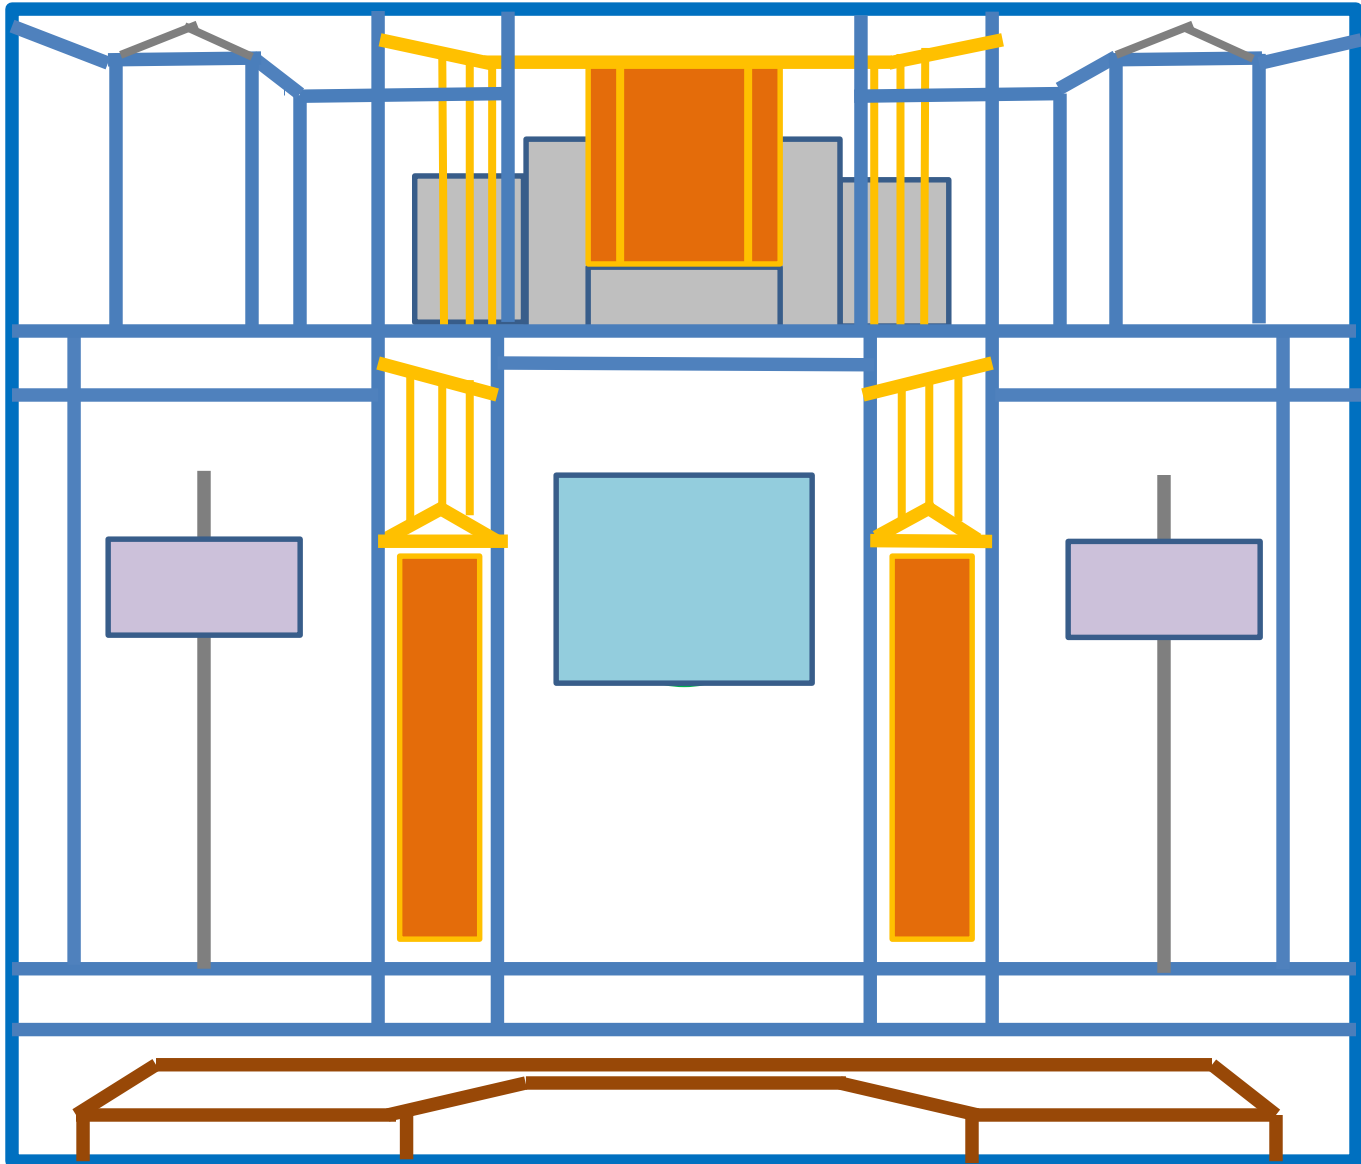

# **Fourth Style**

## **4. House of the Vettii**

Triclinium

Pompeii VI.15.1

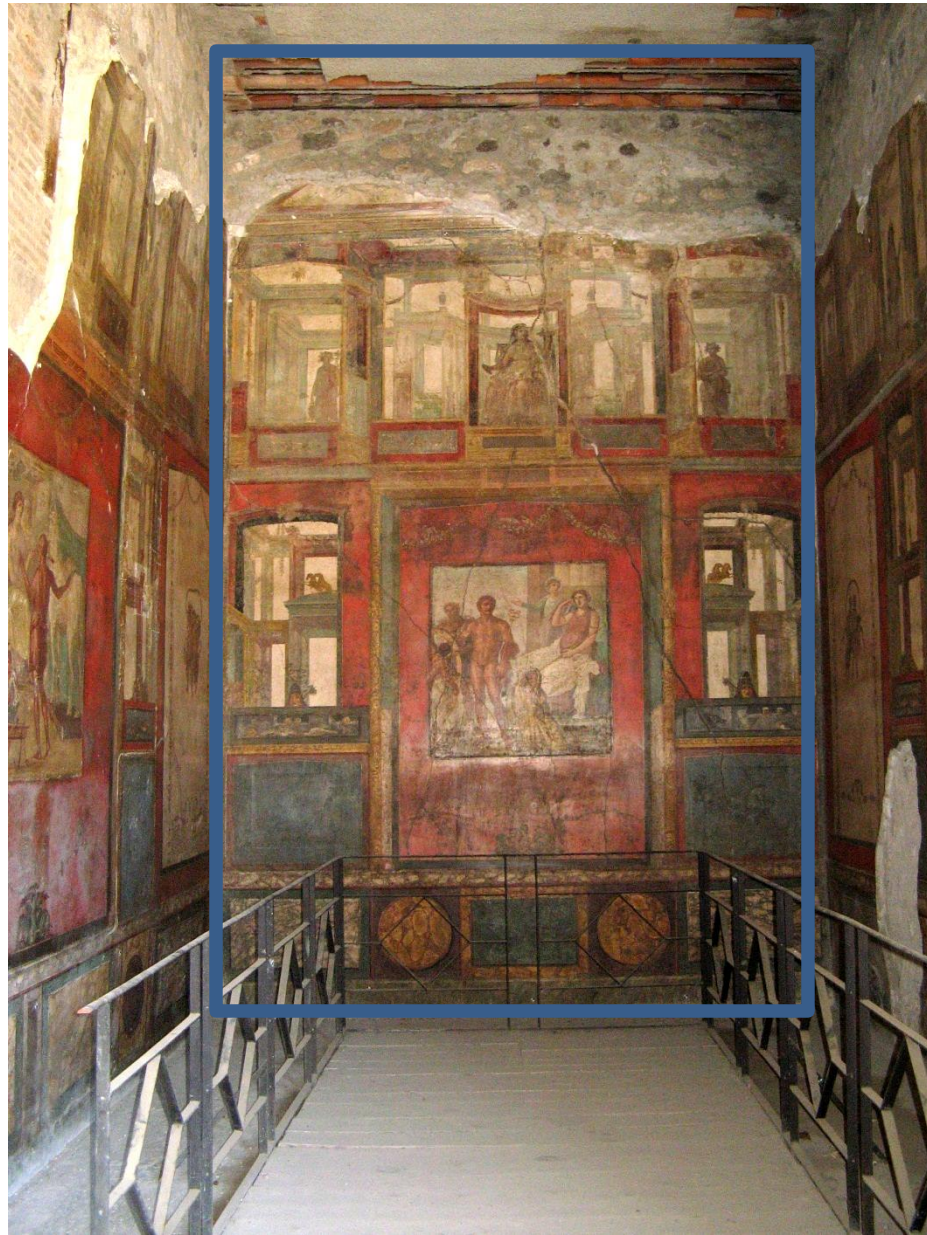

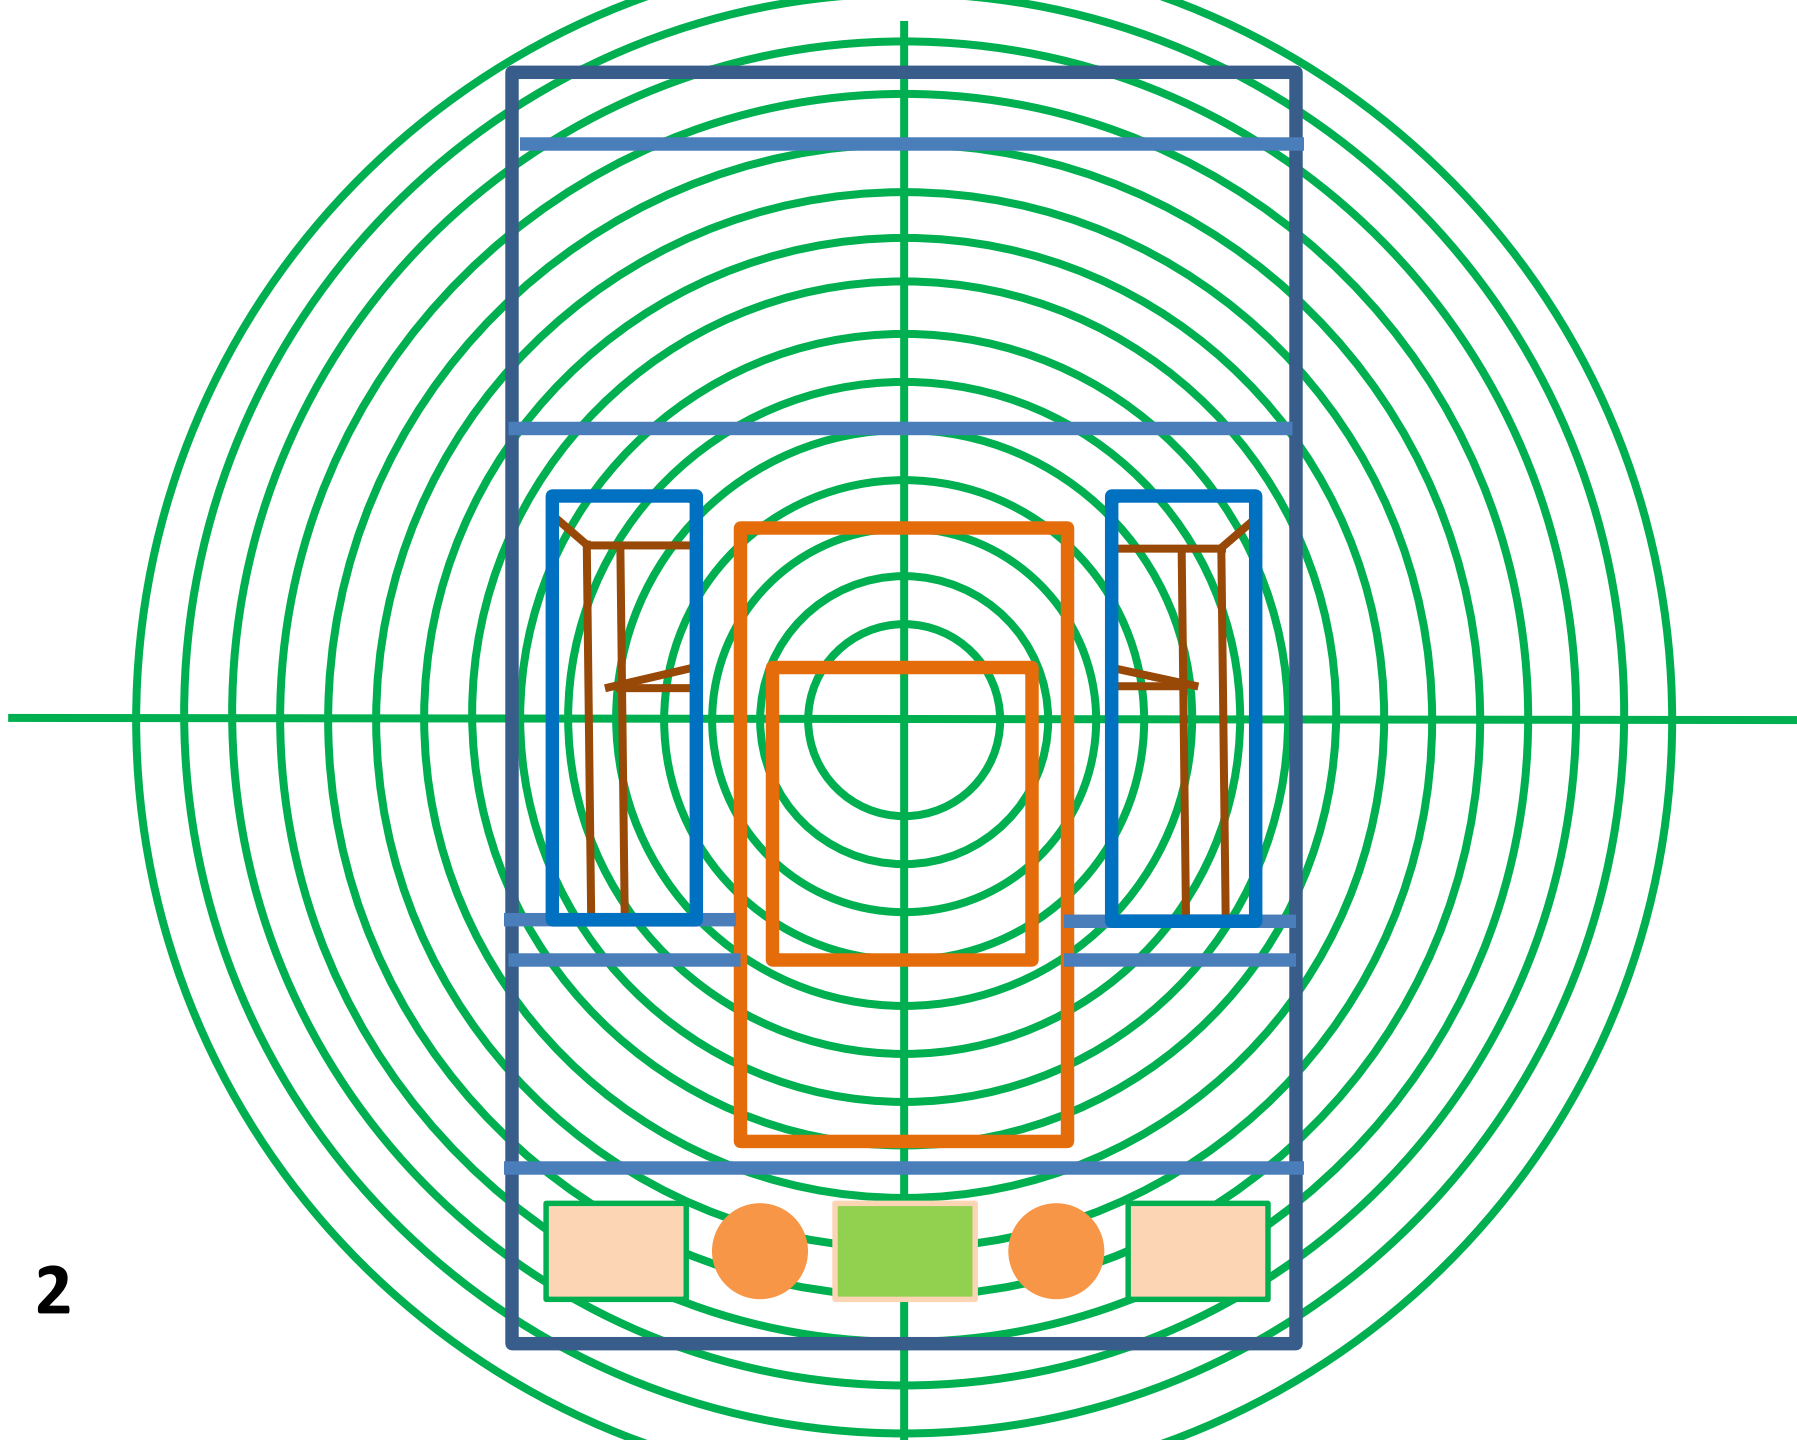

2



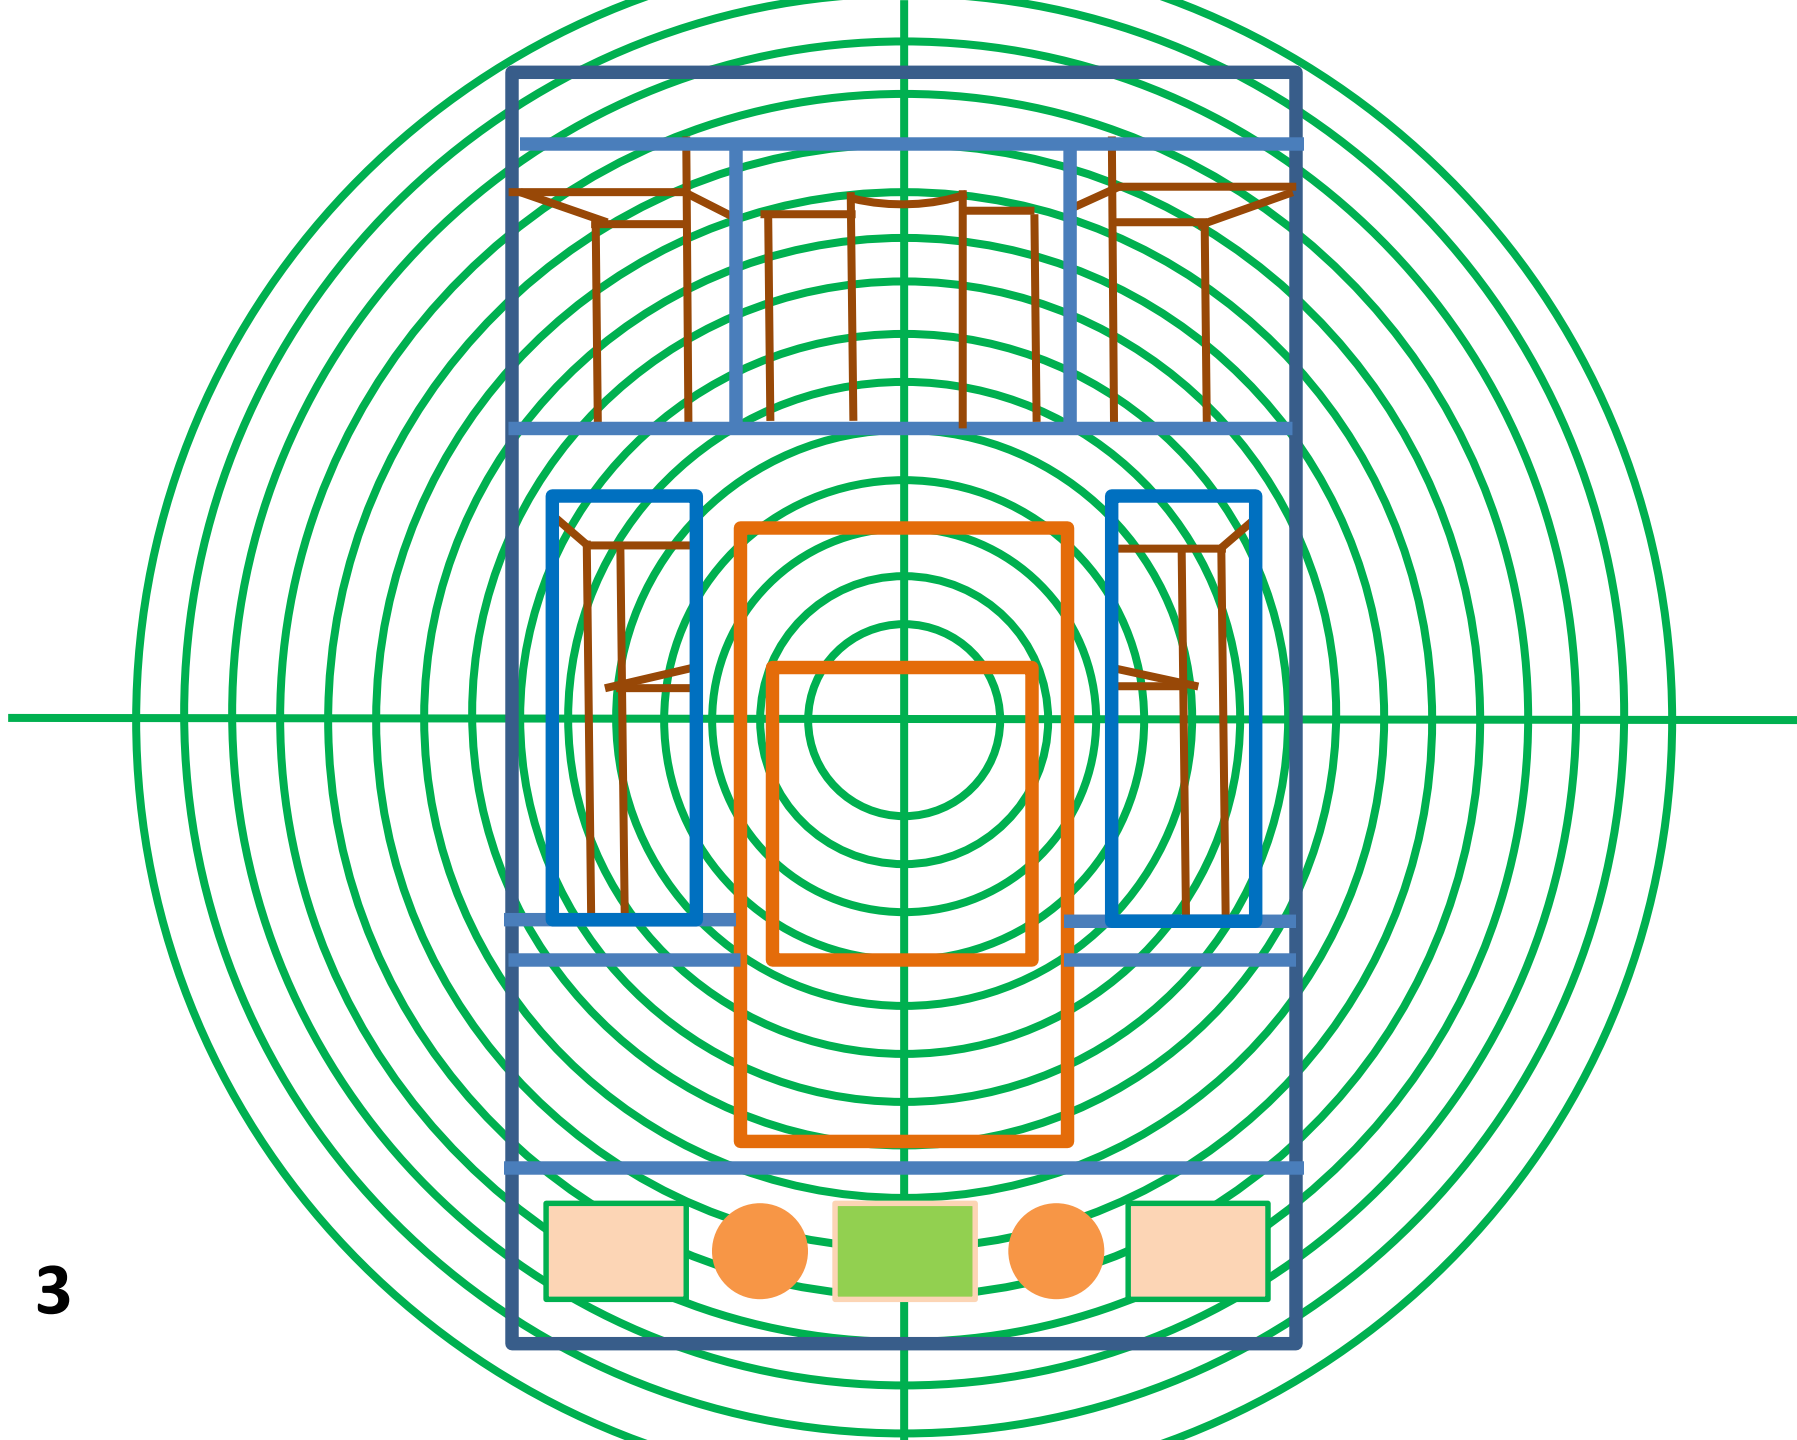

3

4

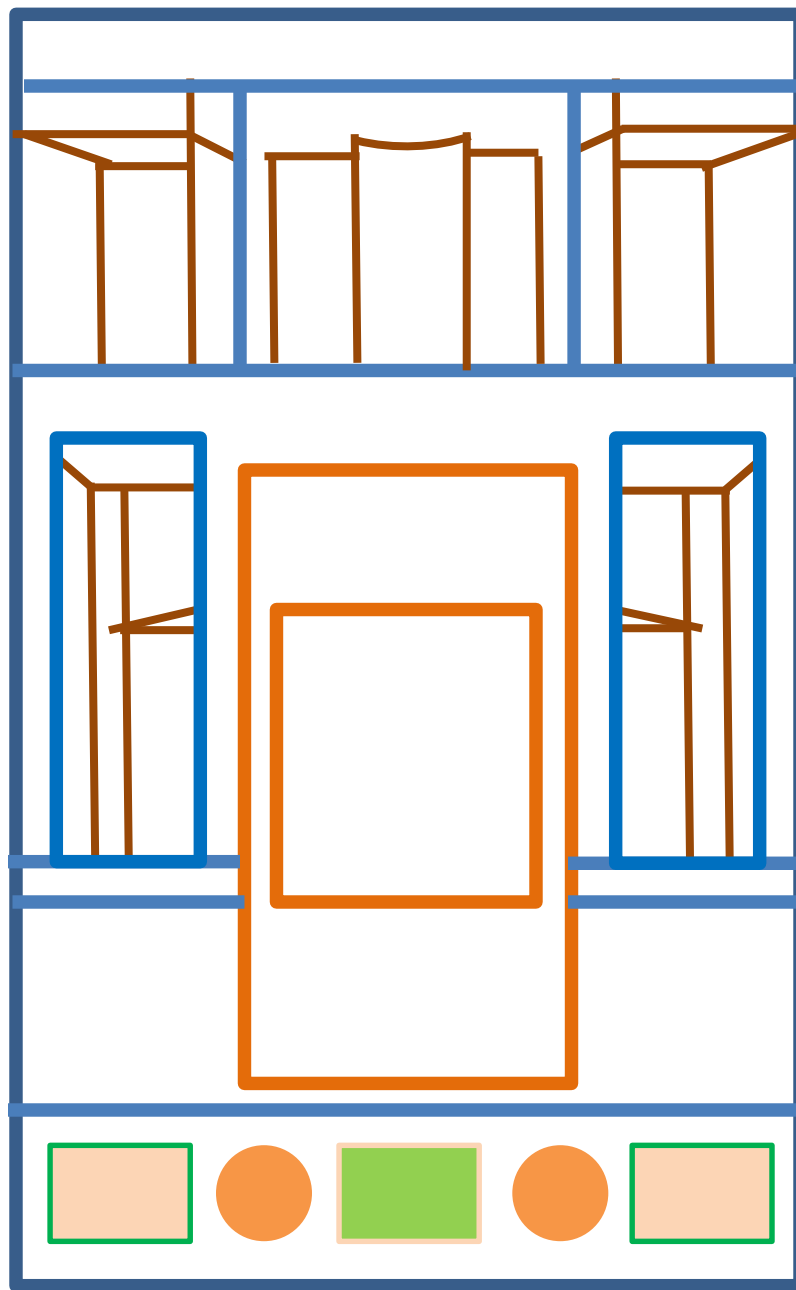

Supplement: s1 [file s1]
